# Supplementary material for: Enantioselective conjugate addition of an α,α-dithioacetonitrile with nitroalkenes using chiral bis(imidazoline)–Pd complexes
Source: Royal Society of Chemistry journal article supplement (doi:10.1039/c9cc02443c), 2019-01-01
Supplement: c9cc02443c1.pdf [file c9cc02443c1.pdf]

## Supporting Information

### Enantioselective conjugate addition of an $\alpha,\alpha$ -dithioacetonitrile with nitrostyrenes using chiral bis(imidazoline)-Pd complexes

Shuichi Nakamura,<sup>\*,a,b</sup> Akari Tokunaga,<sup>a</sup> Hikari Saito,<sup>a</sup> Masaru Kondo<sup>a,b</sup>

<sup>a</sup>Department of Life Science and Applied Chemistry, Graduate School of Engineering,  
Nagoya Institute of Technology, Gokiso, Showa-ku, Nagoya 466-8555 (Japan).

E-mail: snakamur@nitech.ac.jp

<sup>b</sup>Frontier Research Institute for Material Science,  
Nagoya Institute of Technology, Gokiso, Showa-ku, Nagoya 466-8555 (Japan)

#### CONTENTS:

|                                                                                                                                              |         |
|----------------------------------------------------------------------------------------------------------------------------------------------|---------|
| General method.....                                                                                                                          | S2      |
| Various reaction conditions.....                                                                                                             | S3      |
| Synthesis of palladium-pincer complex with phehim.....                                                                                       | S4      |
| General procedure for the reaction of $\alpha,\alpha$ -dithioacetonitrile with nitroalkenes catalyzed by chiral phehim-Pd(II) complexes..... | S4      |
| Characterization data of <b>3aa, b-o, 5-11</b> .....                                                                                         | S4-S15  |
| ESI-Mass spectroscopic analysis.....                                                                                                         | S16     |
| References.....                                                                                                                              | S17     |
| <sup>1</sup> H, <sup>19</sup> F, and <sup>13</sup> C NMR Spectra.....                                                                        | S18-S42 |
| HPLC Charts.....                                                                                                                             | S43-S64 |
| MO calculation.....                                                                                                                          | S65-68  |

## General Methods:

All reactions were performed in oven-dried glassware under a positive pressure of argon. Solvents were transferred via syringe and were introduced into the reaction vessels through a rubber septum. All reactions were monitored by thin-layer chromatography (TLC) carried out on 0.25 mm Merck silica-gel (60-F254). The TLC plates were visualized with UV light and Basic KMnO<sub>4</sub> aqueous solution/heat. Column chromatography was carried out on a column packed with silica-gel 60N spherical neutral size 63-210 μm. Optical rotations were measured on a JASCO P-2200. The <sup>1</sup>H NMR (300 MHz), <sup>19</sup>F NMR (282 MHz) spectra for solution in CDCl<sub>3</sub> were recorded on Varian Mercury 300 or <sup>13</sup>C NMR (125 MHz) spectrum for solution in CDCl<sub>3</sub> were recorded on Bruker Avance 500. Chemical shifts (δ) are expressed in ppm downfield from internal TMS, CHCl<sub>3</sub>. Infrared spectra were recorded on a JASCO FT/IR-4600 spectrometer with ZnSe ATR unit. HRMS were recorded on a Waters SYNAPT G2 (ESI). ESI Mass spectra were recorded on a SHIMADZU LCMS-2020 using positive mode. HPLC analyses were performed on a JASCO PU-2089T, UV-2075T, CO-2060Plus using 4.6 x 250 mm DAICEL CHIRALPAK IG<sup>®</sup>, IF-3<sup>®</sup>, IH<sup>®</sup> column. The reagents **2a-d** were synthesized according to previous synthetic methods.<sup>1)</sup> Nitroalkenes **1a-p** were synthesized according to previous synthetic methods.<sup>2)</sup>

**Table S1. Reaction of ethyl 1,3-dithiolane-2-carboxylate **2e** or various acetonitrile carbanion equivalents **2f-i** with nitrostyrene **1a** using **4f-Ag** system**

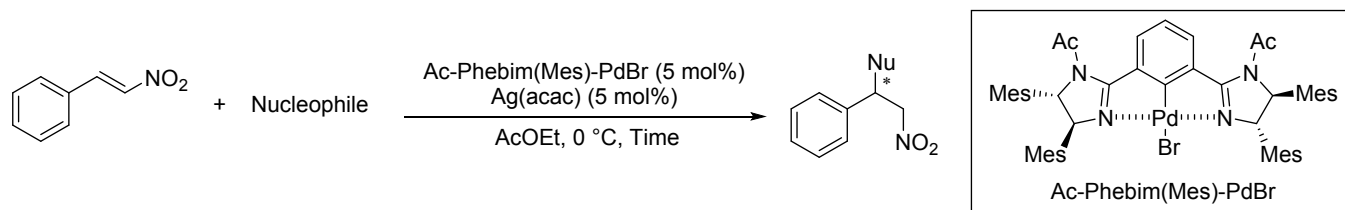

| Entry | <b>2</b>  | Nucleophile              | product | Time (h) | Yield (%)       | Ee (%) |
|-------|-----------|--------------------------|---------|----------|-----------------|--------|
| 1     | <b>2e</b> |                          |         | 48       | N.R.            | -      |
| 2     | <b>2f</b> | CH <sub>3</sub> CN       |         | 24       | N.R.            | -      |
| 3     | <b>2g</b> | PhS-CH <sub>2</sub> -CN  |         | 48       | Complex Mixture | -      |
| 4     | <b>2h</b> |                          |         | 24       | 42              | 73     |
| 5     | <b>2i</b> | HOOC-CH <sub>2</sub> -CN |         | 24       | N.R.            | -      |

## Synthesis of palladium-pincer complex with phehim:

Catalysts **4a-g** were synthesized by using previous method.<sup>3)</sup>

### General procedure for the reaction of $\alpha,\alpha$ -dithioacetonitrile with nitroalkenes catalyzed by chiral phehim-Pd(II) complexes:

**2a** (15.1  $\mu$ L, 0.15 mmol) and *trans*- $\beta$ -nitrostyrene **1a** (14.9 mg, 0.1 mmol) were added to the mixture of Ag(acac) (1.0 mg, 5  $\mu$ mol) and **4f** (4.8 mg, 5  $\mu$ mol) in AcOEt (0.65 mL) at 0 °C. After disappearance of *trans*- $\beta$ -nitrostyrene **1a** monitored by TLC, the reaction was quenched by saturated NH<sub>4</sub>Cl aq. and extracted with AcOEt, and combined organic layer was dried over Na<sub>2</sub>SO<sub>4</sub>. Filtration and removal of solvent under reduced pressure gave a residue, which was purified by column chromatography (Toluene/Hexane=80/20) giving **3aa** (27.6 mg, 99 %) as a white solid.

#### (3*R*)-2-[(1,3-Dithiolane)-2-yl]-4-nitro-3-phenylbutanenitrile (**3aa**)

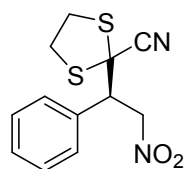

$[\alpha]_D^{25} +44.8$  (*c* 0.603, CHCl<sub>3</sub>, 98% ee); mp = 108.2-109.0 °C; <sup>1</sup>H NMR (300 MHz, CDCl<sub>3</sub>)  $\delta$  3.41-3.66 (m, 4H), 4.18 (dd, *J* = 9.0, 5.7 Hz, 1H), 5.03-5.15 (m, 2H), 7.37-7.50 (m, 5H); <sup>13</sup>C NMR (125.5 MHz, CDCl<sub>3</sub>)  $\delta$  40.3, 41.0, 51.6, 59.0, 76.9, 119.3, 128.6, 129.1, 129.7, 134.4; IR (ATR) 2925, 2224, 1551, 1496, 1455, 1423, 1376, 1281, 1198, 1092, 977, 956, 919, 903, 853, 824, 738, 698, 653 cm<sup>-1</sup>; HRMS (ESI, positive) *m/z* calcd for C<sub>12</sub>H<sub>12</sub>N<sub>2</sub>NaO<sub>2</sub>S<sub>2</sub> [M+Na<sup>+</sup>]: 303.0238, found 303.0234; HPLC (DAICEL CHIRALPAK IG<sup>®</sup>, Hexane:*i*PrOH = 80:20, 1.0 mL/min, 254 nm) t<sub>R</sub> = 12.3 min (minor), 13.5 min (major).

#### (3*R*)-2-[(1,3-Dithiolane)-2-yl]-3-(4-fluorophenyl)-4-nitrobutanenitrile (**3ba**)

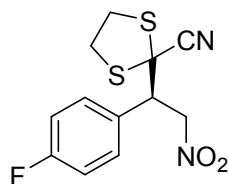

Reaction of **1b** (16.7 mg, 0.10 mmol), **2a** (14.5  $\mu$ L, 0.15 mmol) using Ag(acac) (1.0 mg, 5  $\mu$ mol) and **4f** (4.8 mg, 5  $\mu$ mol) in AcOEt (0.65 mL) at r.t. for 9 h gave (*R*)-**3ba** (29.3 mg, 98%, 95% ee) as a pale yellow solid.

$[\alpha]_D^{25} +32.5$  (*c* 0.817, CHCl<sub>3</sub>, 96% ee); mp = 98.3-99.0 °C; <sup>1</sup>H NMR (300 MHz, CDCl<sub>3</sub>)  $\delta$  3.43-3.68 (m, 4H), 4.16 (dd, *J* = 10.1, 5.0 Hz, 1H), 4.98-5.13 (m, 2H), 7.05-7.13 (m, 2H), 7.42-7.49 (m, 2H); <sup>13</sup>C NMR (125.5 MHz, CDCl<sub>3</sub>)  $\delta$  40.4, 41.1, 51.0, 58.8, 76.9, 116.2 (d, *J*<sub>C-F</sub> = 21.7 Hz), 119.1, 130.2 (d, *J*<sub>C-F</sub> = 3.3 Hz), 130.5 (d, *J*<sub>C-F</sub> = 8.4 Hz), 163.3 (d, *J*<sub>C-F</sub> = 249.2 Hz); <sup>19</sup>F NMR (282.3 MHz, CDCl<sub>3</sub>)  $\delta$  -111.1 (s, 1F); IR (ATR) 2924, 2852, 2224, 1604, 1552, 1509, 1423, 1375, 1227, 1163, 1107, 1015, 843, 807, 718, 652 cm<sup>-1</sup>; HRMS (ESI, positive) *m/z* calcd for C<sub>12</sub>H<sub>11</sub>FN<sub>2</sub>NaO<sub>2</sub>S<sub>2</sub> [M+Na<sup>+</sup>]: 321.0144, found 321.0135; HPLC (DAICEL CHIRALPAK IG<sup>®</sup>, Hexane:*i*PrOH = 80:20, 1.0 mL/min, 254 nm) t<sub>R</sub> = 12.4 min (minor), 15.5 min (major).

**(3*R*)-2-[(1,3-Dithiolane)-2-yl]-3-(3-fluorophenyl)-4-nitrobutanenitrile (3ca)**

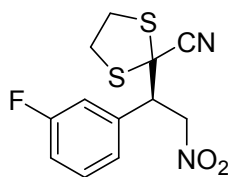

Reaction of **1c** (16.7 mg, 0.10 mmol), **2a** (14.7  $\mu$ L, 0.15 mmol) using Ag(acac) (1.0 mg, 5  $\mu$ mol) and **4f** (4.8 mg, 5  $\mu$ mol) in AcOEt (0.65 mL) at r.t. for 48 h gave (*R*)-**3ca** (23.1 mg, 78%, 97% ee) as a pale yellow solid.

$[\alpha]_D^{25} +31.4$  (*c* 0.333, CHCl<sub>3</sub>, 97% ee); mp = 67.1-68.1 °C; <sup>1</sup>H NMR (300 MHz, CDCl<sub>3</sub>)  $\delta$  3.44-3.68 (m, 4H), 4.17 (dd, *J* = 9.9, 4.8 Hz, 1H), 4.99-5.14 (m, 2H), 7.07-7.42 (m, 4H); <sup>13</sup>C NMR (125.5 MHz, CDCl<sub>3</sub>)  $\delta$  40.5, 41.1, 51.3, 58.5, 76.7, 115.9 (d, *J*<sub>C-F</sub> = 22.6 Hz), 116.8 (d, *J*<sub>C-F</sub> = 20.8 Hz), 119.0, 124.3 (d, *J*<sub>C-F</sub> = 3.1 Hz), 130.8 (d, *J*<sub>C-F</sub> = 8.3 Hz), 136.6 (d, *J*<sub>C-F</sub> = 7.3 Hz), 162.7 (d, *J*<sub>C-F</sub> = 247.9 Hz); <sup>19</sup>F NMR (282.3 MHz, CDCl<sub>3</sub>)  $\delta$  -110.8 (ddd, 1F, *J* = 9.0, 9.0, 5.9 Hz); IR (ATR) 2925, 2854, 2223, 1725, 1612, 1590, 1556, 1546, 1487, 1452, 1434, 1380, 1281, 1260, 1234, 1149, 1096, 1003, 900, 872, 856, 790, 723, 695, 660 cm<sup>-1</sup>; HRMS (ESI, positive) *m/z* calcd for C<sub>12</sub>H<sub>11</sub>FN<sub>2</sub>NaO<sub>2</sub>S<sub>2</sub> [M+Na<sup>+</sup>]: 321.0144, found 321.0140; HPLC (DAICEL CHIRALPAK IG<sup>®</sup>, Hexane:*i*PrOH = 95:5, 1.0 mL/min, 254 nm) tR = 32.3 min (minor), 33.5 min (major).

**(3*R*)-2-[(1,3-Dithiolane)-2-yl]-3-(4-chlorophenyl)-4-nitrobutanenitrile (3da)**

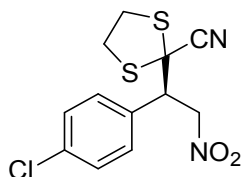

Reaction of **1d** (18.4 mg, 0.10 mmol), **2a** (14.8  $\mu$ L, 0.15 mmol) using Ag(acac) (1.0 mg, 5  $\mu$ mol) and **4f** (4.8 mg, 5  $\mu$ mol) in AcOEt (0.65 mL) at r.t. for 24 h gave (*R*)-**3da** (27.5 mg, 87%, 97% ee) as a pale yellow solid.

$[\alpha]_D^{25} +31.8$  (*c* 0.867, CHCl<sub>3</sub>, 97% ee); mp = 72.9-73.8 °C <sup>1</sup>H NMR (300 MHz, CDCl<sub>3</sub>)  $\delta$  3.43-3.67 (m, 4H), 4.10-4.17 (m, 1H), 4.98-5.13 (m, 2H), 7.36-7.43(m, 4H); <sup>13</sup>C NMR (125.5 MHz, CDCl<sub>3</sub>)  $\delta$  40.5, 41.1, 51.1, 58.6, 76.7, 119.1, 129.4, 130.0, 132.8, 135.8; IR (ATR) 2925, 2852, 2224, 1718, 1552, 1493, 1415, 1375, 1281, 1198, 1093, 1014, 905, 842, 806, 775, 714, 654 cm<sup>-1</sup>; HRMS (ESI, positive) *m/z* calcd for C<sub>12</sub>H<sub>11</sub>ClN<sub>2</sub>NaO<sub>2</sub>S<sub>2</sub> [M+Na<sup>+</sup>]: 336.9848, found 336.9840; HPLC (DAICEL CHIRALPAK IG<sup>®</sup>, Hexane:*i*PrOH = 80:20, 1.0 mL/min, 254 nm) tR = 15.6 min (minor), 26.2 min (major).

**(3*R*)-2-[(1,3-Dithiolane)-2-yl]-3-(3-chlorophenyl)-4-nitrobutanenitrile (3ea)**

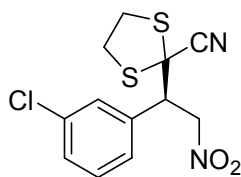

Reaction of **1e** (18.4 mg, 0.10 mmol), **2a** (14.7  $\mu$ L, 0.15 mmol) using Ag(acac) (1.0 mg, 5  $\mu$ mol) and **4f** (4.8 mg, 5  $\mu$ mol) in AcOEt (0.65 mL) at r.t. for 24 h gave (*R*)-**3ea** (24.1 mg, 77%, 98% ee) as a white solid.  $[\alpha]_D^{25} +41.7$  (*c* 0.503, CHCl<sub>3</sub>, 98% ee); mp = 77.8-78.4 °C; <sup>1</sup>H NMR (300 MHz, CDCl<sub>3</sub>)  $\delta$  3.44-3.69 (m, 4H), 4.14 (dd, *J* = 9.9, 4.8 Hz, 1H), 4.99-5.14 (m, 2H), 7.30-7.45 (m, 4H); <sup>13</sup>C NMR (125.5 MHz, CDCl<sub>3</sub>)  $\delta$  40.5, 41.1, 51.3, 58.5, 76.6, 119.0, 126.6, 129.0, 130.0, 130.4, 135.0, 136.3; IR (ATR) 2925, 2855, 2220, 1730, 1545, 1476, 1435, 1381, 1280, 1200, 1089, 841, 785, 696, 657 cm<sup>-1</sup>; HRMS (ESI, positive) *m/z* calcd for C<sub>12</sub>H<sub>11</sub>ClN<sub>2</sub>NaO<sub>2</sub>S<sub>2</sub> [M+Na<sup>+</sup>]: 336.9848, found 336.9839; HPLC (DAICEL CHIRALPAK IG<sup>®</sup>, Hexane:*i*PrOH = 90:10, 1.0 mL/min, 254 nm) tR = 17.9 min (major), 18.7 min (minor).

**(3*R*)-2-[(1,3-Dithiolane)-2-yl]-3-(4-bromophenyl)-4-nitrobutanenitrile (3fa)**

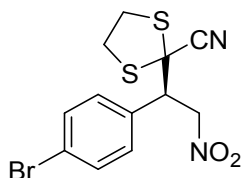

Reaction of **1f** (22.8 mg, 0.10 mmol), **2a** (14.9  $\mu$ L, 0.15 mmol) using Ag(acac) (1.0 mg, 5  $\mu$ mol) and **4f** (4.8 mg, 5  $\mu$ mol) in AcOEt (0.65 mL) at 0 °C for 48 h gave (*R*)-**3fa** (28.7 mg, 80%, 98% ee) as a white solid.  $[\alpha]_D^{25} +26.1$  (*c* 0.853, CHCl<sub>3</sub>, 96% ee); mp = 98.5-99.4 °C; <sup>1</sup>H NMR (300 MHz, CDCl<sub>3</sub>)  $\delta$  3.43-3.68 (m, 4H), 4.14 (dd, *J* = 10.2, 4.8 Hz, 1H), 4.98-5.13 (m, 2H), 7.26-7.37 (m, 2H), 7.51-7.55 (m, 2H); <sup>13</sup>C NMR (125.5 MHz, CDCl<sub>3</sub>)  $\delta$  40.5, 41.2, 51.2, 58.5, 76.6, 119.1, 124.1, 130.3, 132.3, 133.3; IR (ATR) 2925, 2853, 2224, 1719, 1552, 1489, 1423, 1374, 1281, 1198, 1075, 1011, 838, 802, 768, 712, 650 cm<sup>-1</sup>; HRMS (ESI, positive) *m/z* calcd for C<sub>12</sub>H<sub>11</sub>BrN<sub>2</sub>NaO<sub>2</sub>S<sub>2</sub>, [M+Na<sup>+</sup>]: 380.9343, found 380.9340; HPLC (DAICEL CHIRALPAK IG<sup>®</sup>, Hexane:*i*PrOH = 80:20, 1.0 mL/min, 254 nm) tR = 17.9 min (minor), 32.4 min (major).

**(3*R*)-2-[(1,3-Dithiolane)-2-yl]-4-nitro-3-(4-trifluoromethyl)phenylbutanenitrile (3ga)**

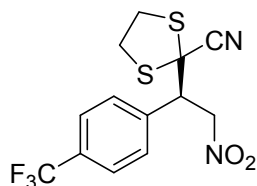

Reaction of **1g** (21.7 mg, 0.10 mmol), **2a** (14.9  $\mu$ L, 0.15 mmol) using Ag(acac) (1.0 mg, 5  $\mu$ mol) and **4f** (4.8 mg, 5  $\mu$ mol) in AcOEt (0.65 mL) at r.t. for 24 h gave (*R*)-**3ga** (29.9 mg, 86%, 96% ee) as a pale yellow oil.

$[\alpha]_D^{25} +27.4$  (*c* 0.757, CHCl<sub>3</sub>, 96% ee); <sup>1</sup>H NMR (300 MHz, CDCl<sub>3</sub>)  $\delta$  3.45-3.69 (m, 4H), 4.24 (dd, *J* = 9.9, 5.1 Hz, 1H), 5.04-5.18 (m, 2H), 7.59-7.69 (m, 4H); <sup>13</sup>C NMR (125.5 MHz, CDCl<sub>3</sub>)  $\delta$  40.6, 41.2, 51.4, 58.3, 76.6, 118.9, 122.6, 124.7, 126.1 (q, *J*<sub>C-F</sub> = 3.8 Hz), 129.2, 131.9 (q, *J*<sub>C-F</sub> = 3.3 Hz), 138.2; <sup>19</sup>F NMR (282.3 MHz, CDCl<sub>3</sub>)  $\delta$  -62.9. (s, 3F) IR (ATR) 2923, 2851, 2225, 1722, 1620, 1556, 1422, 1376, 1323, 1166, 1117, 1068, 1017, 849, 815, 737, 657 cm<sup>-1</sup>; HRMS (ESI, positive) *m/z* calcd for C<sub>13</sub>H<sub>11</sub>N<sub>2</sub>NaO<sub>2</sub>S<sub>2</sub>F<sub>3</sub> [*M*+Na<sup>+</sup>]: 371.0112, found 371.0107; HPLC (DAICEL CHIRALPAK IG<sup>®</sup>, Hexane:*i*PrOH = 80:20, 1.0 mL/min, 254 nm) *t*R = 9.7 min (minor), 12.3 min (major).

**(3R)-2-[(1,3-Dithiolane)-2-yl]-3-(4-methylphenyl)-4-nitrobutanenitrile (3ha)**

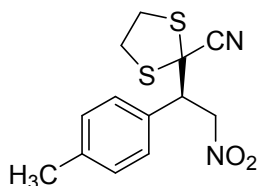

Reaction of **1h** (16.3 mg, 0.10 mmol), **2a** (15.1  $\mu$ L, 0.15 mmol) using Ag(acac) (1.0 mg, 5  $\mu$ mol) and **4f** (4.8 mg, 5  $\mu$ mol) in AcOEt (0.65 mL) at 50 °C for 24 h gave (*R*)-**3ha** (13.8 mg, 47%, 94% ee) as a white oil.

$[\alpha]_D^{25} +30.7$  (*c* 0.470, CHCl<sub>3</sub>, 94% ee); <sup>1</sup>H NMR (300 MHz, CDCl<sub>3</sub>)  $\delta$  2.35 (s, 3H), 3.42-3.67 (m, 4H), 4.11-4.16 (m, 1H), 5.00-5.13 (m, 2H), 7.19 (d, *J* = 8.0 Hz, 2H), 7.34 (d, *J* = 8.0 Hz, 2H); <sup>13</sup>C NMR (125.5 MHz, CDCl<sub>3</sub>)  $\delta$  21.3, 40.3, 41.0, 51.3, 59.1, 77.0, 119.3, 128.4, 129.8, 131.4, 139.7; IR (ATR) 2924, 2856, 2224, 1721, 1552, 1515, 1425, 1375, 1281, 1261, 1189, 1119, 1022, 978, 955, 907, 796, 716, 642 cm<sup>-1</sup>; HRMS (ESI, positive) *m/z* calcd for C<sub>13</sub>H<sub>14</sub>N<sub>2</sub>NaO<sub>2</sub>S<sub>2</sub> [*M*+Na<sup>+</sup>]: 317.0394, found 317.0386; HPLC (DAICEL CHIRALPAK IG<sup>®</sup>, Hexane:*i*PrOH = 80:20, 1.0 mL/min, 254 nm) *t*R = 12.3 min (minor), 15.4 min (major).

**(3*R*)-2-[(1,3-Dithiolane)-2-yl]-3-(4-methoxyphenyl)-4-nitrobutanenitrile (3ia)**

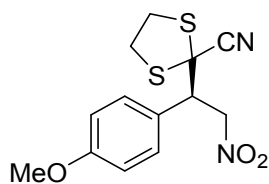

Reaction of **1i** (17.9 mg, 0.10 mmol), **2a** (14.9  $\mu$ L, 0.15 mmol) using Ag(acac) (1.0 mg, 5  $\mu$ mol) and **4f** (4.8 mg, 5  $\mu$ mol) in AcOEt (0.65 mL) at 0 °C for 72 h gave (*R*)-**3ia** (18.4 mg, 59%, 98% ee) as a yellow oil.

$[\alpha]_D^{25} +31.1$  (*c* 0.307, CHCl<sub>3</sub>, 98% ee); <sup>1</sup>H NMR (300 MHz, CDCl<sub>3</sub>)  $\delta$  3.41-3.67 (m, 4H), 3.80 (s, 3H), 4.10 (dd, *J* = 9.8, 5.3 Hz, 1H), 4.98-5.12 (m, 2H), 6.88-6.93 (m, 2H), 7.32-7.41 (m, 2H); <sup>13</sup>C NMR (125.5 MHz, CDCl<sub>3</sub>)  $\delta$  40.3, 41.1, 51.1, 55.3, 59.3, 77.0, 114.4, 119.4, 126.2, 129.8, 160.4; IR (ATR) 2932, 2839, 2224, 1715, 1609, 1552, 1513, 1462, 1426, 1376, 1251, 1182, 1120, 1030, 908, 840, 802, 729, 650 cm<sup>-1</sup>; HRMS (ESI, positive) *m/z* calcd for C<sub>13</sub>H<sub>14</sub>N<sub>2</sub>NaO<sub>3</sub>S<sub>2</sub> [M+Na<sup>+</sup>]: 333.0344, found 333.0335; HPLC (DAICEL CHIRALPAK IG<sup>®</sup>, Hexane:*i*PrOH = 80:20, 1.0 mL/min, 254 nm) *t*R = 18.7 min (minor), 24.9 min (major).

**(3*R*)-2-[(1,3-Dithiolane)-2-yl]-3-(2-naphthyl)-4-nitrobutanenitrile (3ja)**

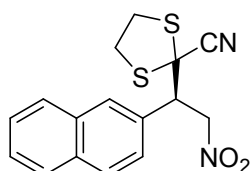

Reaction of **1j** (19.9 mg, 0.10 mmol), **2a** (15.1  $\mu$ L, 0.15 mmol) using Ag(acac) (1.0 mg, 5  $\mu$ mol) and **4f** (4.8 mg, 5  $\mu$ mol) in AcOEt (0.65 mL) at r.t. for 48 h gave (*R*)-**3ja** (25.3 mg, 77%, 98% ee) as a white solid.

$[\alpha]_D^{25} +45.3$  (*c* 0.623, CHCl<sub>3</sub>, 98% ee); mp = 140.8-141.0 °C; <sup>1</sup>H NMR (300 MHz, CDCl<sub>3</sub>)  $\delta$  3.44-3.66 (m, 4H), 4.40 (dd, *J* = 8.9, 6.2 Hz, 1H), 5.16-5.26 (m, 2H), 7.50-7.60 (m, 3H), 7.82-7.94 (m, 4H); <sup>13</sup>C NMR (125.5 MHz, CDCl<sub>3</sub>)  $\delta$  40.4, 41.1, 51.8, 59.0, 77.0, 119.3, 125.4, 126.8, 127.1, 127.8, 128.4, 128.5, 129.1, 131.8, 133.0, 133.6; IR (ATR) 2925, 2853, 2228, 1733, 1555, 1425, 1376, 1345, 1278, 1260, 1243, 1128, 1091, 1048, 1017, 966, 902, 869, 814, 754, 693, 672, 629 cm<sup>-1</sup>; HRMS (ESI, positive) *m/z* calcd for C<sub>16</sub>H<sub>14</sub>N<sub>2</sub>NaO<sub>2</sub>S<sub>2</sub> [M+Na<sup>+</sup>]: 353.0394, found 353.0400; HPLC (DAICEL CHIRALPAK IG<sup>®</sup>, Hexane:*i*PrOH = 80:20, 1.0 mL/min, 254 nm) *t*R = 17.2 min (major), 18.2 min (minor).



**(3R)-2-[(1,3-Dithiolane)-2-yl]-3-(2-furyl)-4-nitrobutanenitrile (3ka)**

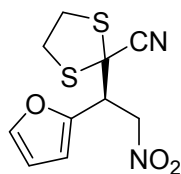

Reaction of **1k** (13.9 mg, 0.10 mmol), **2a** (14.9  $\mu$ L, 0.15 mmol) using Ag(acac) (1.0 mg, 5  $\mu$ mol) and **4f** (4.8 mg, 5  $\mu$ mol) in AcOEt (0.65 mL) at 0 °C for 96 h gave (*R*)-**3ka** (19.1 mg, 71%, 95% ee) as a brown oil.

$[\alpha]_D^{25} +30.0$  (*c* 0.497, CHCl<sub>3</sub>, 95% ee); <sup>1</sup>H NMR (300 MHz, CDCl<sub>3</sub>)  $\delta$  3.46-3.64 (m, 4H), 4.37 (dd, *J* = 6.4, 5.4 Hz, 1H), 4.99-5.09 (m, 2H), 6.38-6.40 (m, 1H), 6.51 (d, *J* = 3.3 Hz, 1H), 7.45 (d, *J* = 1.8 Hz, 1H); <sup>13</sup>C NMR (125.5 MHz, CDCl<sub>3</sub>)  $\delta$  40.6, 41.0, 45.6, 57.9, 110.9, 111.0, 118.9, 143.8, 147.4; IR (ATR) 3122, 2926, 2225, 1721, 1553, 1500, 1423, 1375, 1281, 1241, 1180, 1146, 1082, 1016, 976, 916, 812, 744, 677, 633 cm<sup>-1</sup>; HRMS (ESI, positive) *m/z* calcd for C<sub>10</sub>H<sub>10</sub>N<sub>2</sub>NaO<sub>3</sub>S<sub>2</sub> [M+Na<sup>+</sup>]: 293.0031, found 293.0025; HPLC (DAICEL CHIRALPAK IG<sup>®</sup>, Hexane:*i*PrOH = 80:20, 1.0 mL/min, 254 nm) tR = 13.1 min (minor), 23.2 min (major).

**(3R)-2-[(1,3-Dithiolane)-2-yl]-3-(3-furyl)-4-nitrobutanenitrile (3la)**

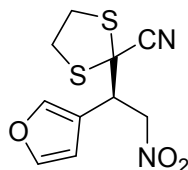

Reaction of **1l** (13.9 mg, 0.10 mmol), **2a** (15.1  $\mu$ L, 0.15 mmol) using Ag(acac) (1.0 mg, 5  $\mu$ mol) and **4f** (4.8 mg, 5  $\mu$ mol) in AcOEt (0.65 mL) at r.t. for 48 h gave (*R*)-**3la** (20.5 mg, 76%, 94% ee) as a white solid.

$[\alpha]_D^{25} +36.3$  (*c* 0.577, CHCl<sub>3</sub>, 94% ee); mp = 53.8-54.5 °C; <sup>1</sup>H NMR (300 MHz, CDCl<sub>3</sub>)  $\delta$  3.43-3.68 (m, 4H), 4.15 (dd, *J* = 10.5, 4.2 Hz, 1H), 4.80-4.88 (m, 1H), 5.00-5.06 (m, 1H), 6.58 (d, *J* = 1.8 Hz, 1H), 7.44 (dd, *J* = 2.1, 2.1 Hz, 1H), 7.56 (s, 1H); <sup>13</sup>C NMR (125.5 MHz, CDCl<sub>3</sub>)  $\delta$  40.6, 41.2, 44.0, 58.7, 77.1, 109.1, 119.3, 119.4, 141.9, 144.1; IR (ATR) 2925, 2854, 2227, 1736, 1549, 1504, 1435, 1420, 1379, 1339, 1281, 1192, 1165, 1095, 1075, 1024, 940, 908, 873, 827, 792, 735, 672, 605 cm<sup>-1</sup>; HRMS (ESI, positive) *m/z* calcd for C<sub>10</sub>H<sub>10</sub>N<sub>2</sub>NaO<sub>3</sub>S<sub>2</sub> [M+Na<sup>+</sup>]: 293.0031, found 293.0023; HPLC (DAICEL CHIRALPAK IG<sup>®</sup>, Hexane:*i*PrOH = 80:20, 1.0 mL/min, 254 nm) tR = 15.2 min (minor), 21.0 min (major).

**(3*R*)-2-[(1,3-Dithiolane)-2-yl]-4-nitro-3-(2-thienyl)butanenitrile (3ma)**

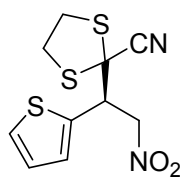

Reaction of **1m** (15.5 mg, 0.10 mmol), **2a** (14.9  $\mu$ L, 0.15 mmol) using Ag(acac) (1.0 mg, 5  $\mu$ mol) and **4f** (4.8 mg, 5  $\mu$ mol) in AcOEt (0.65 mL) at 0  $^{\circ}$ C for 72 h gave (*R*)-**3ma** (26.0 mg, 91%, 97% ee) as a white solid.

$[\alpha]_D^{25} +44.4$  (*c* 0.517, CHCl<sub>3</sub>, 97% ee); mp = 120.8-121.5  $^{\circ}$ C; <sup>1</sup>H NMR (300 MHz, CDCl<sub>3</sub>)  $\delta$  3.47-3.66 (m, 4H), 4.50 (dd, *J* = 10.2, 4.2 Hz, 1H), 4.93-5.01 (m, 1H), 5.12 (dd, *J* = 13.2, 4.2 Hz, 1H), 7.01-7.04 (dd, *J* = 5.1, 3.6 Hz, 1H), 7.22-7.26 (m, 1H), 7.35 (dd, *J* = 5.1, 1.2 Hz, 1H); <sup>13</sup>C NMR (125.5 MHz, CDCl<sub>3</sub>)  $\delta$  40.8, 41.3, 47.8, 59.2, 78.0, 119.1, 127.0, 127.3, 128.7, 135.9; IR (ATR) 2965, 2925, 2231, 1741, 1551, 1438, 1415, 1383, 1281, 1241, 1197, 1168, 1090, 950, 910, 849, 810, 712, 676, 656 cm<sup>-1</sup>; HRMS (ESI, positive) *m/z* calcd for C<sub>10</sub>H<sub>10</sub>N<sub>2</sub>NaO<sub>2</sub>S<sub>3</sub> [M+Na<sup>+</sup>]: 308.9802, found 308.9808; HPLC (DAICEL CHIRALPAK IG<sup>®</sup>, Hexane:*i*PrOH = 80:20, 1.0 mL/min, 254 nm) tR = 15.7 min (minor), 25.1 min (major).

**(3R)-2-[(1,3-Dithiolane)-2-yl]-4-nitro-3-propylbutanenitrile (3na)**

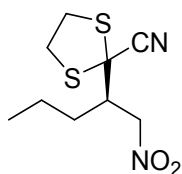

Reaction of **1n** (11.6  $\mu$ L, 0.10 mmol), **2a** (14.7  $\mu$ L, 0.15 mmol) using Ag(acac) (1.0 mg, 5  $\mu$ mol) and **4f** (4.8 mg, 5  $\mu$ mol) in AcOEt (0.65 mL) at 0  $^{\circ}$ C for 48 h. The residue was purified by silica gel column chromatography (eluent: hexane/diethyl ether, 80:20) to afford (*R*)-**3na** (17.6 mg, 72%, 95% ee) as a white oil.

$[\alpha]_D^{25} -5.5$  (*c* 0.457, CHCl<sub>3</sub>, 95% ee); <sup>1</sup>H NMR (300 MHz, CDCl<sub>3</sub>)  $\delta$  0.98 (t, *J* = 7.2 Hz, 3H), 1.40-1.64 (m, 3H), 1.88-1.99 (m, 1H), 3.11-3.19 (m, 1H), 3.45-3.61 (m, 4H), 4.40 (dd, *J* = 14.4, 5.4 Hz, 1H), 4.77 (dd, *J* = 14.4, 4.8 Hz, 1H); <sup>13</sup>C NMR (125.5 MHz, CDCl<sub>3</sub>)  $\delta$  13.8, 20.4, 35.2, 40.1, 40.2, 44.0, 59.9, 75.9, 119.9; IR (ATR) 2961, 2927, 2873, 2224, 1551, 1465, 1422, 1377, 1281, 1243, 1212, 1148, 1106, 1039, 977, 903, 852, 802, 741, 677, 643 cm<sup>-1</sup>; HRMS (ESI, positive) *m/z* calcd for C<sub>9</sub>H<sub>14</sub>N<sub>2</sub>NaO<sub>2</sub>S<sub>2</sub> [M+Na<sup>+</sup>]: 269.0394, found 269.0403; HPLC (DAICEL CHIRALPAK IG<sup>®</sup>, Hexane:*i*PrOH = 80:20, 1.0 mL/min, 254 nm) tR = 13.0 min (major), 15.6 min (minor).

**(3*R*)-2-[(1,3-Dithiolane)-2-yl]-3-(2-methylpropyl)-4-nitrobutanenitrile (3oa)**

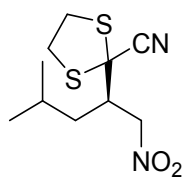

Reaction of **1o** (14.3  $\mu$ l, 0.10 mmol), **2a** (29.8  $\mu$ L, 0.30 mmol) using Ag(acac) (1.0 mg, 5  $\mu$ mol) and **4f** (4.8 mg, 5  $\mu$ mol) in AcOEt (0.65 mL) at r.t. for 24 h. The residue was purified by silica gel column chromatography (eluent: hexane/diethyl ether, 80:20) to afford (*R*)-**3oa** (20.9 mg, 80%, 96% ee) as a white oil.

$[\alpha]_D^{25}$  -11.9 (*c* 0.293, CHCl<sub>3</sub>, 96% ee); mp = 42.6-43.0 °C; <sup>1</sup>H NMR (300 MHz, CDCl<sub>3</sub>)  $\delta$  0.97-1.02 (m, 6H), 1.46-1.60 (m, 1H), 1.62-1.76 (m, 2H), 3.18-3.26 (m, 1H), 3.45-3.61 (m, 4H), 4.33 (dd, *J* = 14.7, 4.8 Hz, 1H), 4.77 (dd, *J* = 14.6, 5.6 Hz, 1H); <sup>13</sup>C NMR (125.5 MHz, CDCl<sub>3</sub>)  $\delta$  21.2, 23.5, 26.1, 39.9, 40.2, 42.3, 60.5, 76.1, 119.9; IR (ATR) 2960, 2928, 2871, 2220, 1728, 1550, 1467, 1415, 1375, 1279, 1239, 1170, 1011, 954, 910, 852, 831, 772, 711, 675, 636 cm<sup>-1</sup>; HRMS (ESI, positive) *m/z* calcd for C<sub>10</sub>H<sub>16</sub>N<sub>2</sub>NaO<sub>2</sub>S<sub>2</sub> [*M*+Na<sup>+</sup>]: 283.0551, found 283.0558; HPLC (DAICEL CHIRALPAK IF-3<sup>®</sup>, Hexane:*i*PrOH = 90:10, 1.0 mL/min, 254 nm) tR = 11.3 min (major), 12.9 min (minor).

**(3*R*)-2-[(1,3-Dithiolane)-2-yl]-4-nitro-3-phenylbutanamide (5)**

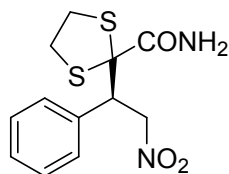

A mixture of **3aa** (83.0 mg, 0.296 mmol), acetaldoxime (54.0  $\mu$ L, 0.882 mmol), InCl<sub>3</sub>·4H<sub>2</sub>O (35.0 mg, 0.119 mmol) in toluene/THF(0.8 mL, v:v=4:1) was heated to 50 °C overnight under argon atmosphere. The reaction was quenched by water and extracted with AcOEt, and combined organic layer was dried over Na<sub>2</sub>SO<sub>4</sub>. Filtration and removal of solvent under reduced pressure gave a residue, which was purified by column chromatography (hexane/EtOAc =50:50) to give compound (*R*)-**5** as a white solid (76.8 mg, 87%, 97% ee).

$[\alpha]_D^{25}$  +22.5 (*c* 0.687, CHCl<sub>3</sub>, 99% ee); mp = 166.3-167.0 °C; <sup>1</sup>H NMR (300 MHz, CDCl<sub>3</sub>)  $\delta$  3.22-3.36 (m, 4H), 4.47-4.52 (m, 1H), 5.10-5.29 (m, 2H), 6.27 (s, 1H), 7.00 (s, 1H), 7.26-7.37 (m, 5H); <sup>13</sup>C NMR (125.5 MHz, CDCl<sub>3</sub>)  $\delta$  40.3, 51.2, 75.0, 78.1, 128.5, 128.6, 129.0, 135.5, 172.9; IR (ATR) 3403, 3119, 1670, 1547, 1456, 1418, 1375, 1282, 1200, 1094, 1026, 981, 848, 815, 768, 742, 697 cm<sup>-1</sup>; HRMS (ESI, positive) *m/z* calcd for C<sub>12</sub>H<sub>14</sub>N<sub>2</sub>NaO<sub>3</sub>S<sub>2</sub> [*M*+Na<sup>+</sup>]: 321.0344, found 321.0344; HPLC (DAICEL CHIRALPAK IG<sup>®</sup>, Hexane:*i*PrOH = 80:20, 1.0 mL/min, 254 nm) tR = 26.0 min (minor), 27.4 min (major).

**(9*R*)-1,4-Dithia-9-phenyl-7-azaspiro[4.4]nonane (6)**

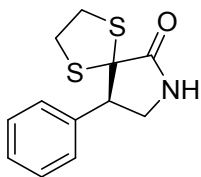

Fe (139.6 mg, 2.50 mmol) was added to the solution of **5** (76.4 mg, 0.255 mmol) in EtOH (3.6 mL) at 90 °C, then aqueous ammonium chloride (133.7 mg in 1.0 mL H<sub>2</sub>O, 2.50 mmol) was added. After 2 h, the reaction mixture was passed through celite with AcOEt and removal solvent under reduced pressure. Then, residue was dissolved in AcOEt/water, and extracted with AcOEt, and combined organic layer was dried over Na<sub>2</sub>SO<sub>4</sub>. Filtration and removal of solvent under reduced pressure gave a residue, which was purified by column chromatography (benzene/AcOEt = 50:50) to give compound (*R*)-**6** as a white solid (48.9 mg, 76%, 96% ee).

$[\alpha]_{\text{D}}^{25} -26.3$  (*c* 0.477, CHCl<sub>3</sub>, 98% ee); mp = 205.1-205.3 °C; <sup>1</sup>H NMR (300 MHz, CDCl<sub>3</sub>) δ 2.72-2.82 (m, 1H), 3.15-3.27 (m, 1H), 3.34-3.51 (m, 1H), 3.62-3.72 (m, 1H), 3.84 (t, *J* = 7.5 Hz, 1H), 7.28-7.43 (m, 5H), 7.89 (s, 1H); <sup>13</sup>C NMR (125.5 MHz, CDCl<sub>3</sub>) δ 39.0, 39.6, 45.3, 51.8, 71.1, 128.0, 128.1, 129.0, 136.6, 177.0; IR (ATR) 3195, 3093, 1693, 1479, 1454, 1423, 1352, 1279, 1254, 1279, 1254, 1087, 833, 763, 695, 636 cm<sup>-1</sup>; HRMS (ESI, positive) *m/z* calcd for C<sub>12</sub>H<sub>13</sub>NNaOS<sub>2</sub> [M+Na<sup>+</sup>]: 274.0336, found 274.0338; HPLC (DAICEL CHIRALPAK IG<sup>®</sup>, Hexane:*i*PrOH = 80:20, 1.0 mL/min, 254 nm) t<sub>R</sub> = 14.0 min (major), 15.3 min (minor).

**(4*R*)-4-Phenyl-2-pyrrolidinone (7)**

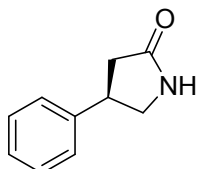

NaBH<sub>4</sub> (64.3 mg, 1.70 mmol) was added to the solution of **6** (42.7 mg, 0.170 mmol) and NiCl<sub>2</sub>·6H<sub>2</sub>O (204 mg, 0.858 mmol) in MeOH/THF (2.0 mL, v:v=4:1) at 0 °C, and the reaction mixture was stirred at room temperature. After 1 h, the reaction mixture was passed through celite with AcOEt and removal solvent under reduced pressure. Then, residue was dissolved in AcOEt/water, and extracted with AcOEt, and combined organic layer was dried over Na<sub>2</sub>SO<sub>4</sub>. Filtration and removal of solvent under reduced pressure gave a residue, which was purified by column chromatography (AcOEt only) to give compound **7** as a white solid (21.9 mg, 80%, 97% ee).

$[\alpha]_{\text{D}}^{25} -69.3$  (*c* 0.39, MeOH, 97% ee) [lit. <sup>4</sup> value  $[\alpha]_{\text{D}}^{20} -30.0$  (*c* 0.3, MeOH)]; mp = 94.5-95.1 °C; <sup>1</sup>H NMR (500 MHz, CDCl<sub>3</sub>) δ 2.47-2.56 (m, 1H), 2.70-2.79 (m, 1H), 3.43 (dd, *J* = 9.0, 6.9 Hz, 1H), 3.64-3.82 (m, 2H), 6.63 (s, 1H), 7.25-7.37 (m, 1H); <sup>13</sup>C NMR (125.5 MHz, CDCl<sub>3</sub>) δ 37.9, 40.3, 49.5, 126.8, 127.1, 128.9, 142.1, 177.7; IR (ATR) 3237, 2924, 2860, 1668, 1494, 1444, 1362, 1259, 1121, 1052, 744, 694, 630 cm<sup>-1</sup>; HRMS (ESI, positive) *m/z* calcd for C<sub>10</sub>H<sub>11</sub>NNaO [M+Na<sup>+</sup>]: 184.0738, found 184.0743; HPLC (DAICEL CHIRALPAK IG<sup>®</sup>, Hexane:*i*PrOH = 80:20, 1.0 mL/min, 254 nm) t<sub>R</sub> = 13.2 min (minor), 14.6 min (major).

**(3*R*)-2-[(1,3-Dithiolane)-2-yl]-4-nitro-3-[3-(cyclopentyloxy)-4-methoxyphenyl]butanenitrile (8)**

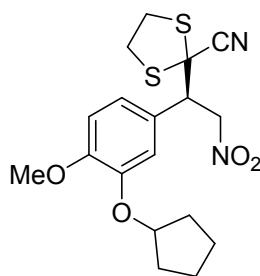

Reaction of **1p** (105.3 mg, 0.40 mmol), **2a** (60.6  $\mu$ L, 0.60 mmol) using Ag(acac) (4.1 mg, 20  $\mu$ mol) and **4f** (19.1 mg, 20  $\mu$ mol) in AcOEt (2.6 mL) at r.t. for 48 h gave (*R*)-**8** (138.8 mg, 88%, 95% ee) as a yellow oil.  $[\alpha]_D^{25} +31.4$  (*c* 0.290, CHCl<sub>3</sub>, 95% ee); <sup>1</sup>H NMR (300 MHz, CDCl<sub>3</sub>)  $\delta$  1.60-1.64 (m, 2H), 1.77-1.99 (m, 6H), 3.47-3.67 (m, 4H), 3.85 (s, 1H), 4.08 (dd, *J* = 4.2, 3.0 Hz, 1H), 4.12-4.81 (m, 1H), 4.98-5.09 (m, 2H), 6.82-6.86 (m, 1H), 6.94-6.98 (m, 2H); <sup>13</sup>C NMR (125.5 MHz, CDCl<sub>3</sub>)  $\delta$  24.2, 32.8, 40.2, 41.1, 51.4, 55.9, 59.3, 80.4, 111.7, 114.4, 119.5, 120.9, 126.4, 147.7, 150.8; IR (ATR) 2958, 2871, 2224, 1717, 1590, 1555, 1514, 1429, 1375, 1257, 1238, 1164, 1142, 1020, 983, 909, 856, 802, 778, 729, 672, 648 cm<sup>-1</sup>; HRMS (ESI, positive) *m/z* calcd for C<sub>18</sub>H<sub>22</sub>N<sub>2</sub>NaO<sub>4</sub>S<sub>2</sub> [*M*+Na<sup>+</sup>]: 417.0919, found 417.0909; HPLC (DAICEL CHIRALPAK IG<sup>®</sup>, Hexane:*i*PrOH = 80:20, 1.0 mL/min, 254 nm) *t*R = 12.1 min (major), 13.2 min (minor).

**(3*R*)-2-[(1,3-Dithiolane)-2-yl]-4-nitro-3-[3-(cyclopentyloxy)-4-methoxyphenyl]butanamide (9)**

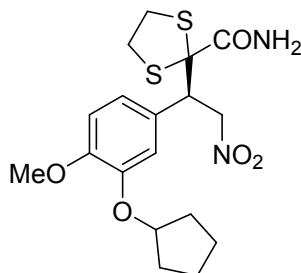

A mixture of **8** (125.6 mg, 0.318 mmol), acetaldoxime (58.4  $\mu$ L, 0.954 mmol), InCl<sub>3</sub>·4H<sub>2</sub>O (28.0 mg, 0.0954 mmol) in toluene/THF(1.6 mL, v:v=4:1) was heated to 100 °C overnight under argon atmosphere. The reaction was quenched by water and extracted with AcOEt, and combined organic layer was dried over Na<sub>2</sub>SO<sub>4</sub>. Filtration and removal of solvent under reduced pressure gave a residue, which was purified by column chromatography (hexane/EtOAc =50:50) to give compound (*R*)-**9** as a white solid (120.5 mg, 92%, 97% ee).

$[\alpha]_D^{25} +12.0$  (*c* 0.203, CHCl<sub>3</sub>, 97% ee); mp = 144.3-144.9 °C; <sup>1</sup>H NMR (300 MHz, CDCl<sub>3</sub>)  $\delta$  1.58-1.65 (m, 2H), 1.76-1.98 (m, 6H), 3.24-3.34 (m, 4H), 3.79 (s 3H), 4.42 (dd, *J* = 10.8, 4.2 Hz, 1H), 4.69-4.75 (m, 1H), 5.06-5.24 (m, 2H), 5.94 (s, 1H), 6.74 (d, *J* = 8.7 Hz, 1H), 6.84-6.86 (m, 2H), 7.01 (d, *J* = 3.6 Hz, 1H); <sup>13</sup>C NMR (125.5 MHz, CDCl<sub>3</sub>)  $\delta$  24.2, 32.8, 40.4, 51.0, 55.9, 75.3, 78.2, 80.3, 111.4, 115.4, 121.1, 127.5, 147.3, 150.0, 172.6; IR (ATR) 3432, 2955, 1676, 1548, 1512, 1427, 1375, 1260, 1234, 1163, 1141, 1022, 980, 846, 802, 777, 741, 687, 620 cm<sup>-1</sup>; HRMS (ESI, positive) *m/z* calcd for C<sub>18</sub>H<sub>24</sub>N<sub>2</sub>NaO<sub>5</sub>S<sub>2</sub> [*M*+Na<sup>+</sup>]: 435.1024, found 435.1020; HPLC (DAICEL CHIRALPAK IH<sup>®</sup>, Hexane:*i*PrOH = 80:20, 1.0 mL/min, 254 nm) *t*R = 28.4 min (minor), 30.7 min (major).

**(9*R*)-1,4-Dithia-9-[3-(cyclopentyloxy)-4-methoxyphenyl]-7-azaspiro[4.4]nonane (10)**

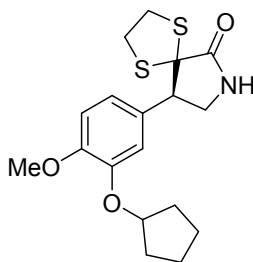

Fe (48.9 mg, 0.875 mmol) was added to the solution of **9** (36.1 mg, 0.0875 mmol) in EtOH (1.3 mL) at 100 °C, then aqueous ammonium chloride (46.8 mg in 0.37 mL H<sub>2</sub>O, 0.875 mmol) was added. After 2.5 h, the reaction mixture was passed through celite with AcOEt and removal solvent under reduced pressure. Then, residue was dissolved in AcOEt/water, and extracted with AcOEt, and combined organic layer was dried over Na<sub>2</sub>SO<sub>4</sub>. Filtration and removal of solvent under reduced pressure gave a residue, which was purified by column chromatography (benzene/AcOEt = 60:40) to give compound (*R*)-**10** as a white solid (27.2 mg, 85%, 96% ee).

$[\alpha]_D^{25}$  -20.0 (*c* 0.710, CHCl<sub>3</sub>, 96% ee); mp = 191.0-191.2 °C; <sup>1</sup>H NMR (300 MHz, CDCl<sub>3</sub>) δ 1.51-1.67 (m, 2H), 1.74-2.04 (m, 6H), 2.75-2.83 (m, 1H), 3.18-3.25 (m, 1H), 3.34-3.51 (m, 2H), 3.63 (d, *J* = 7.5 Hz, 2H), 3.72-3.79 (m, 1H), 3.84 (s, 1H), 4.75-4.81 (m, 1H), 6.80-6.90 (m, 1H), 6.98 (d, *J* = 2.1 Hz, 1H), 7.53 (s, 1H); <sup>13</sup>C NMR (125.5 MHz, CDCl<sub>3</sub>) δ 24.2, 32.9, 38.9, 39.7, 45.2, 51.3, 55.9, 71.1, 80.4, 111.0, 115.8, 121.0, 128.8, 147.0, 149.7, 176.4; IR (ATR) 3189, 3088, 2927, 2869, 1699, 1589, 1515, 1444, 1425, 1358, 1326, 1244, 1164, 1140, 1031, 1005, 982, 848, 796, 774, 737, 702, 635, 614 cm<sup>-1</sup>; HRMS (ESI, positive) *m/z* calcd for C<sub>18</sub>H<sub>23</sub>NNaO<sub>3</sub>S<sub>2</sub> [*M*+Na<sup>+</sup>]: 388.1017, found 388.1020; HPLC (DAICEL CHIRALPAK IH®, Hexane:*i*PrOH = 70:30, 1.0 mL/min, 254 nm) *t*R = 16.2 min (major), 19.1 min (minor).

**(4*R*)-4-[3-(Cyclopentyloxy)-4-methoxyphenyl]-2-pyrrolidinone (11)**

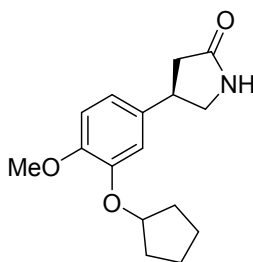

NaBH<sub>4</sub> (34.3 mg, 0.908 mmol) was added to the solution of **10** (22.1 mg, 0.0605 mmol) and NiCl<sub>2</sub>·6H<sub>2</sub>O (72.0 mg, 0.303 mmol) in MeOH/THF (0.75 mL, v:v=4:1) at 0 °C, and the reaction mixture was stirred at room temperature. After 6 h, the reaction mixture was passed through celite with MeOH and removal solvent under reduced pressure. Then, residue was dissolved in AcOEt/water, and extracted with AcOEt, and combined organic layer was dried over Na<sub>2</sub>SO<sub>4</sub>. Filtration and removal of solvent under reduced pressure gave a residue, which was purified by column chromatography (benzene/AcOEt = 10:90) to give compound **11** as a white solid (8.8 mg, 53%, 95% ee).

$[\alpha]_D^{25}$  -28.1 (*c* 0.177, CHCl<sub>3</sub>, 96% ee); mp = 132.4-133.1 °C; <sup>1</sup>H NMR (300 MHz, CDCl<sub>3</sub>) δ 1.58-1.64 (m, 2H), 1.77-1.94 (m, 6H), 2.42-2.52 (m, 1H), 2.66-2.76 (m, 1H), 3.35-3.40 (m, 2H), 3.57-3.78 (m, 1H), 3.83

(s, 3H), 4.73-4.79 (m, 1H), 6.03 (s, 1H), 6.75-6.85 (m, 1H);  $^{13}\text{C}$  NMR (125.5 MHz,  $\text{CDCl}_3$ )  $\delta$  24.1, 32.8, 38.1, 40.0, 49.8, 56.1, 80.6, 112.1, 113.7, 118.8, 134.5, 147.9, 149.1, 177.7; IR (ATR) 3199, 3097, 2941, 1697, 1685, 1593, 1513, 1493, 1439, 1327, 1271, 1249, 1235, 1144, 1025, 1002, 876, 815, 771, 686, 641, 619  $\text{cm}^{-1}$ ; HRMS (ESI, positive)  $m/z$  calcd for  $\text{C}_{16}\text{H}_{21}\text{NNaO}_3$  [ $\text{M}+\text{Na}^+$ ]: 298.1419, found 298.1414; HPLC (DAICEL CHIRALPAK IH<sup>®</sup>, Hexane:*i*PrOH = 70:30, 1.0 mL/min, 254 nm)  $t_R$  = 19.1 min (major), 34.2 min (minor).

## ESI-Mass spectroscopic analysis for complex between 4f and Ag(acac)

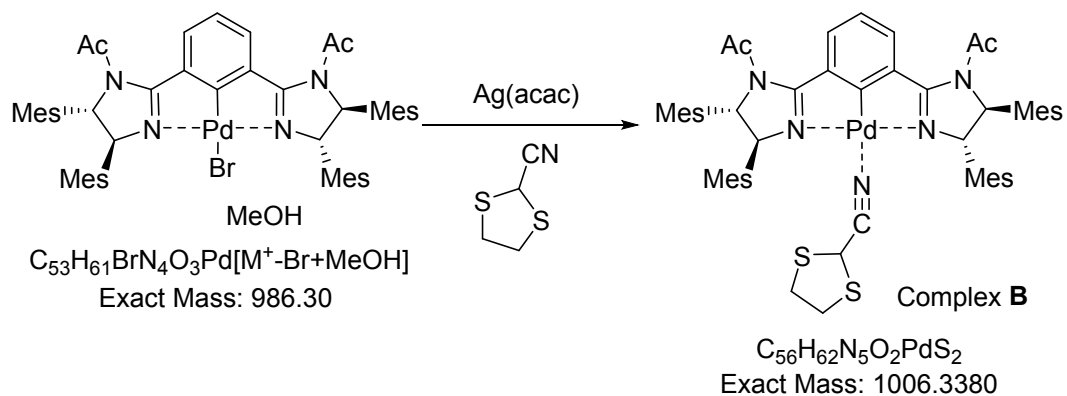

## ESI Mass spectrum of 4f, Ag(acac), and 2a

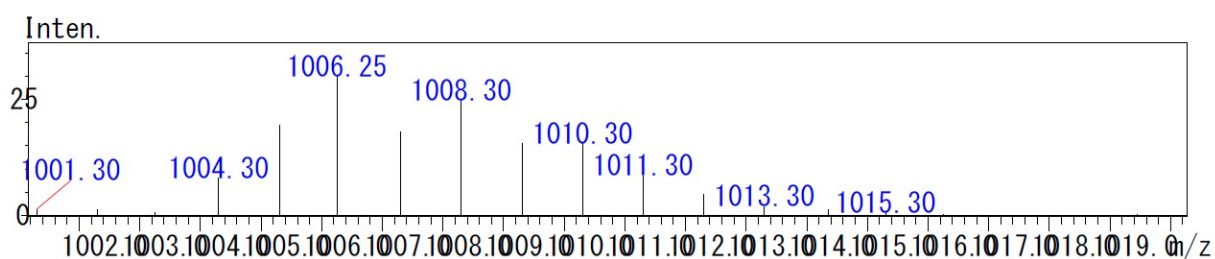

## Theoretical peaks about complex B

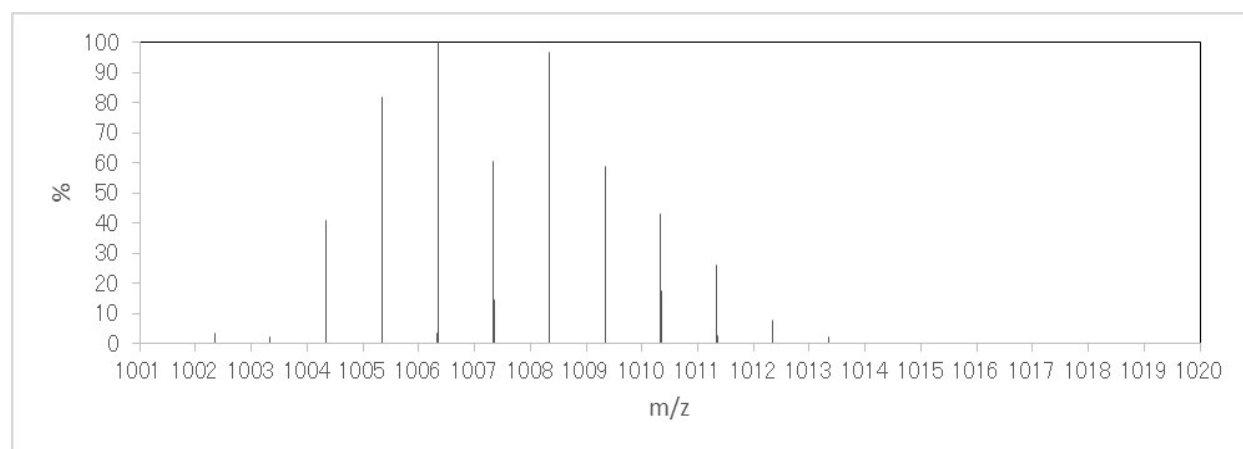



## References

- 1) J. Gonzalez, F. Sanchez, T. Torres, *Synthesis* **1983**, *11*, 911.
- 2) a) A. J. Simpson and Hon Wai Lam, *Org. Lett.* **2013**, *15*, 2586; b) Qiaozhi Yan, Man Liu, Duanyang Kong, Guofu Zi, Guohua Hou, *Chem. Commun.* **2014**, *50*, 12870.
- 3) a) K. Hyodo, S. Nakamura, K. Tsuji, T. Ogawa, Y. Funahashi, N. Shibata, *Adv. Synth. Catal.* **2011**, *353*, 3385; b) K. Hyodo, S. Nakamura, N. Shibata, *Angew. Chem. Int. Ed.* **2012**, *51*, 10337.
- 4) H. Jin, S. T. Kim, G.-S. Hwang, D. H. Ryu, *J. Org. Chem.* **2016**, *81*, 3263.

# <sup>1</sup>H and <sup>13</sup>C NMR

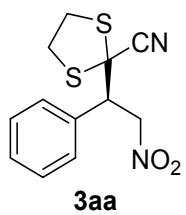

## <sup>1</sup>H NMR

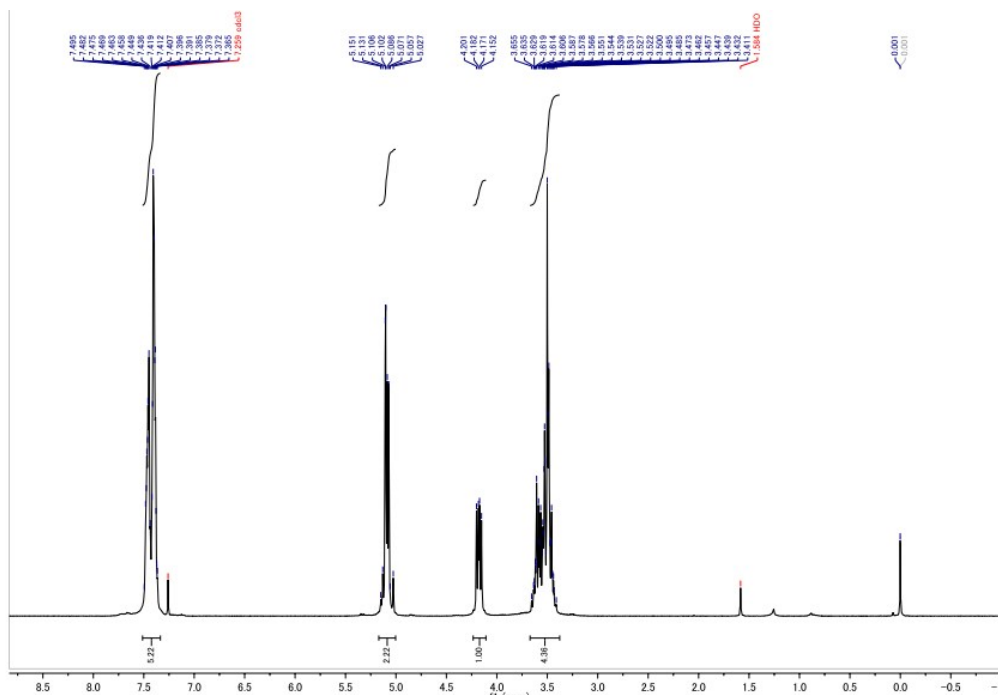

## <sup>13</sup>C NMR

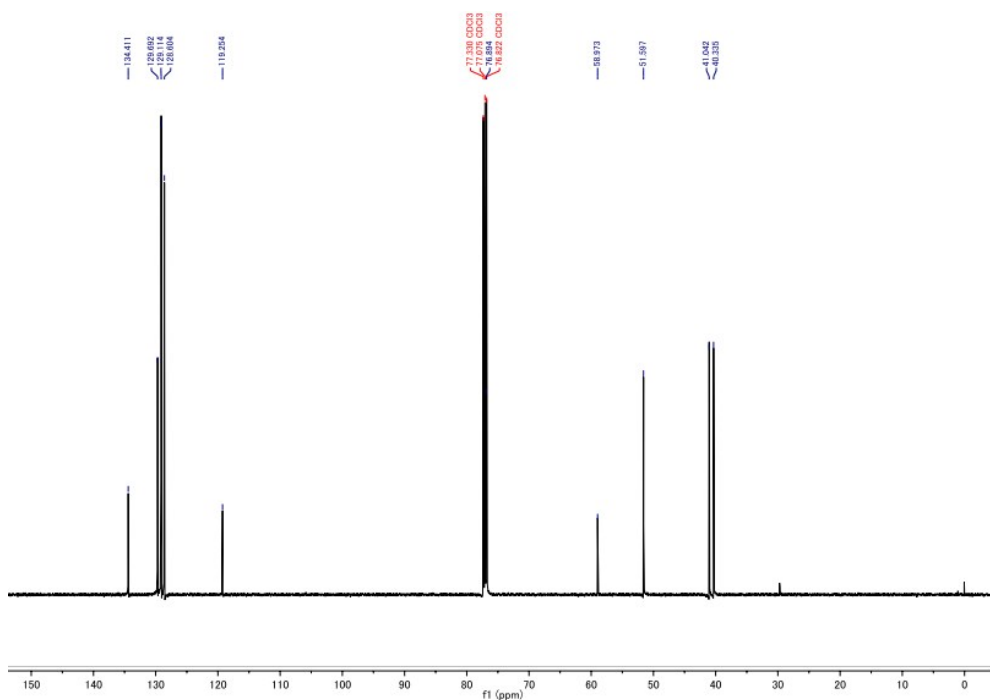

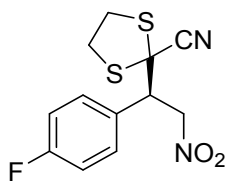

**3ba**

<sup>1</sup>H NMR

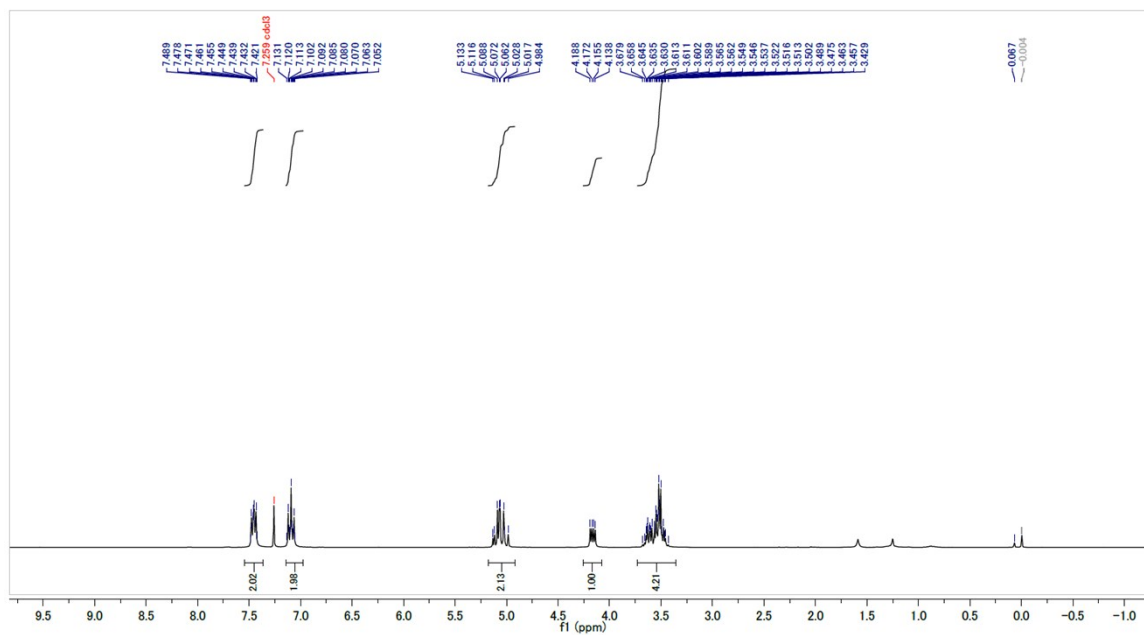

<sup>19</sup>F NMR

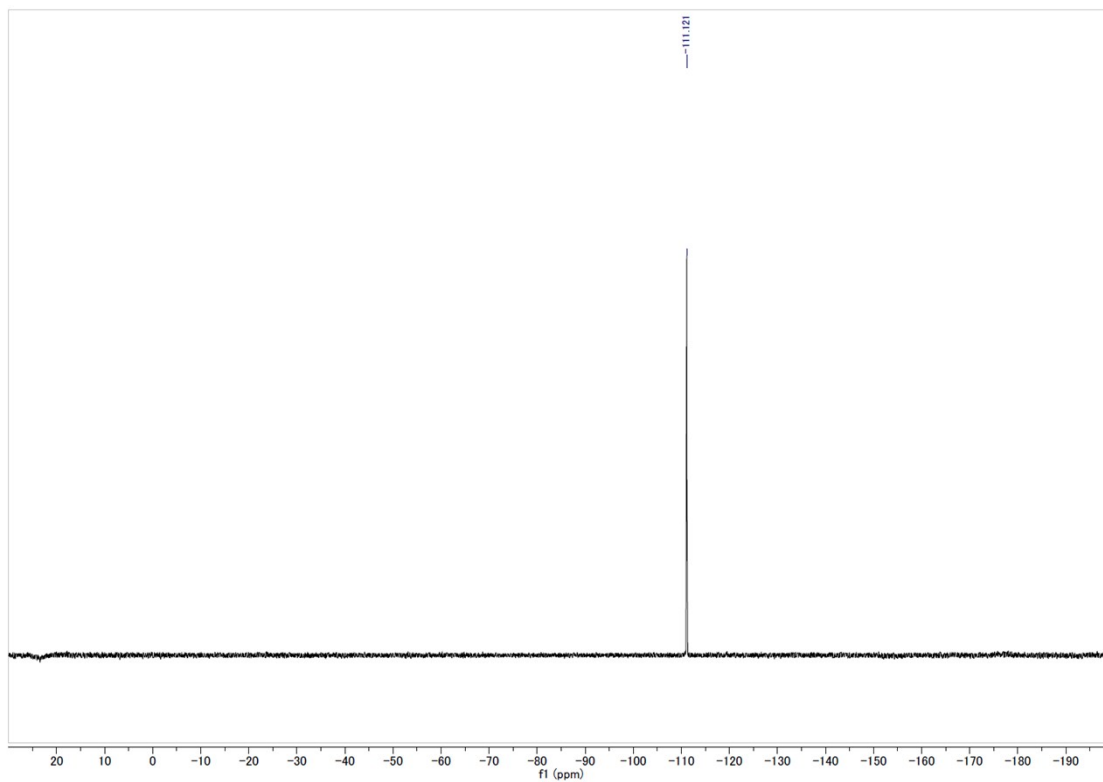

<sup>13</sup>C NMR

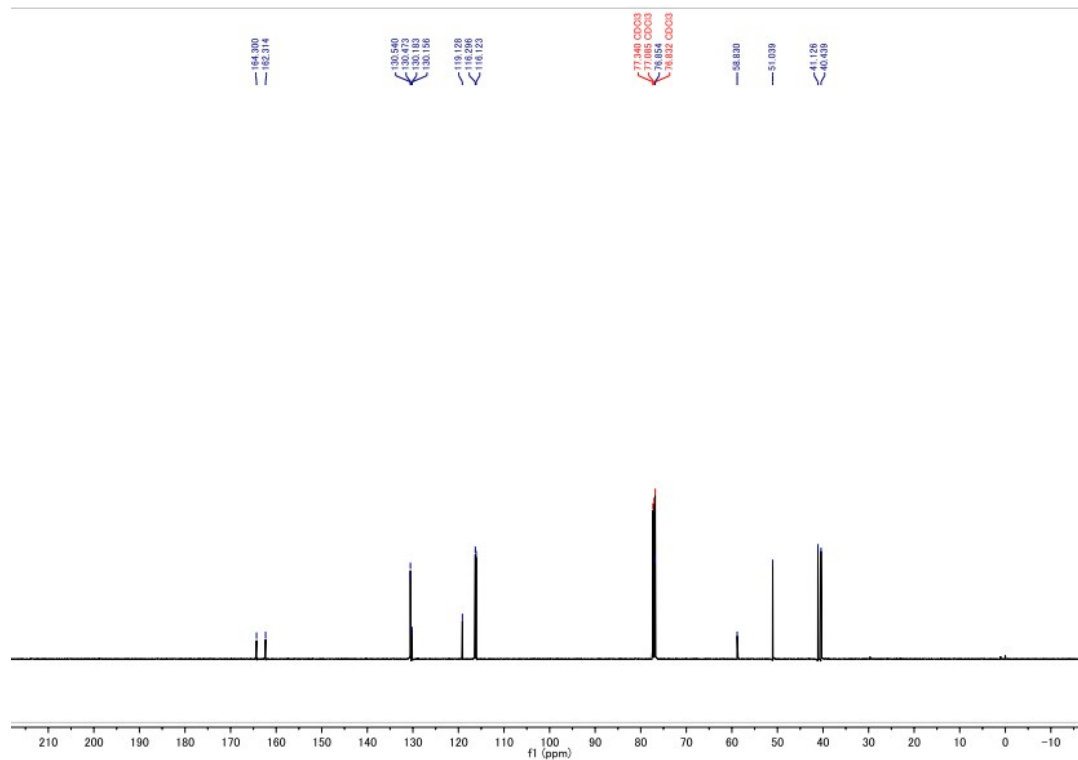

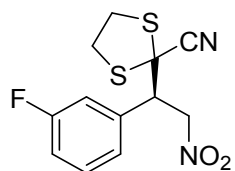

**3ca**

<sup>1</sup>H NMR

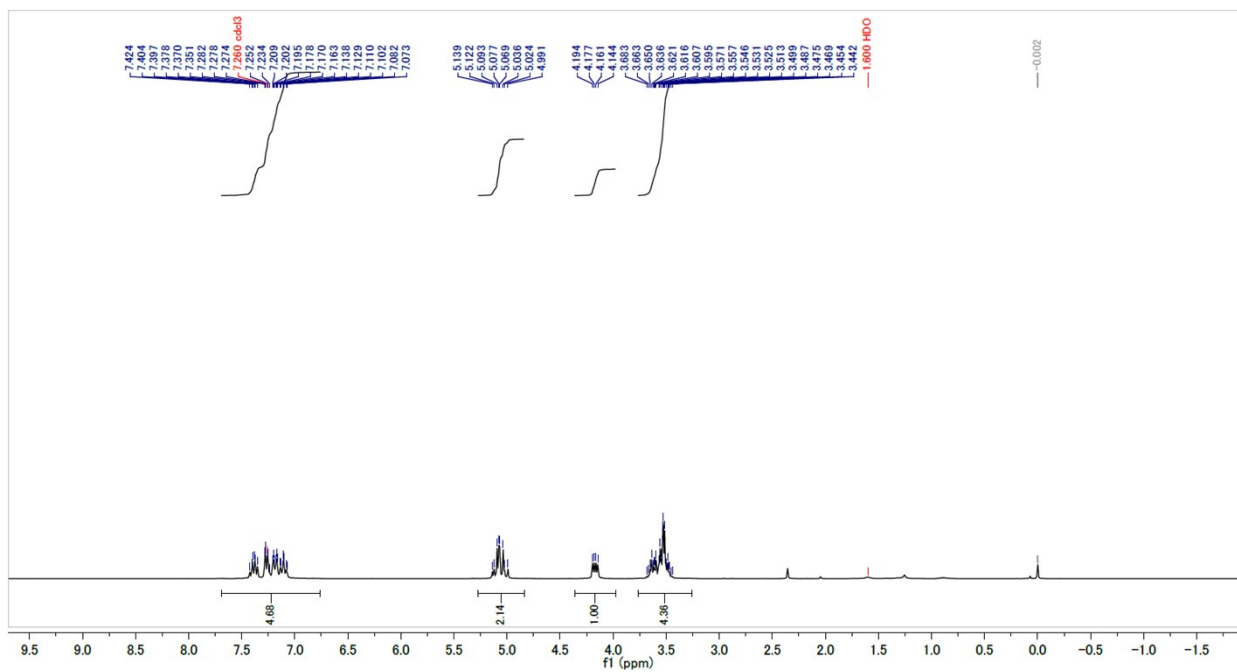

<sup>19</sup>F NMR

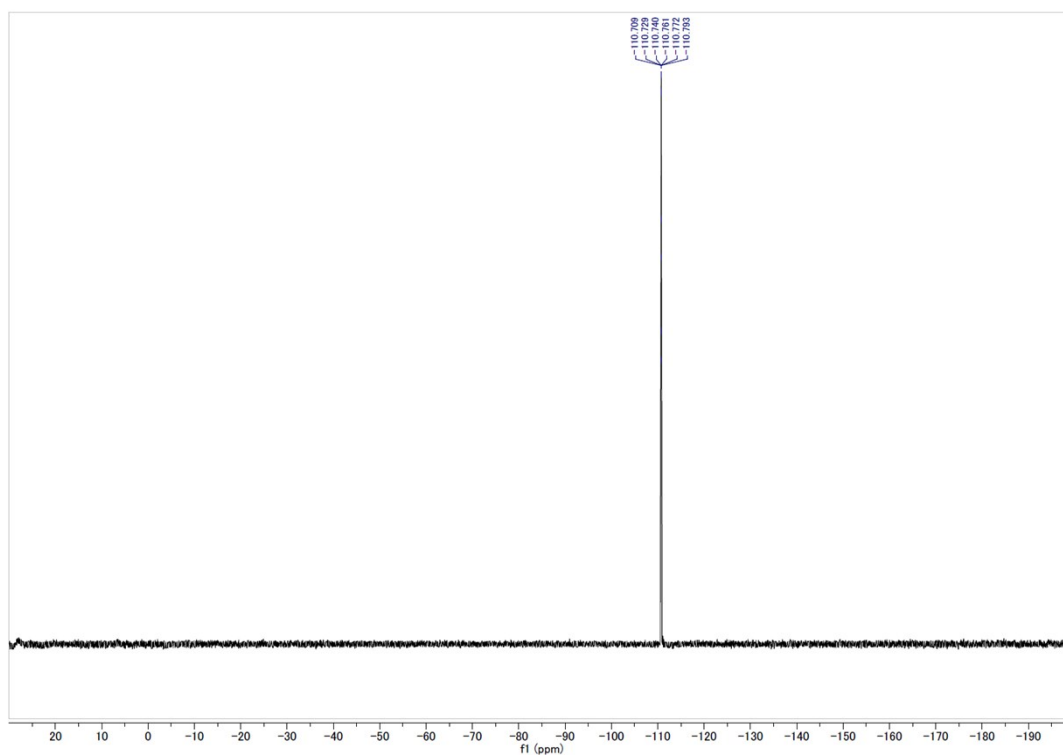

<sup>13</sup>C NMR

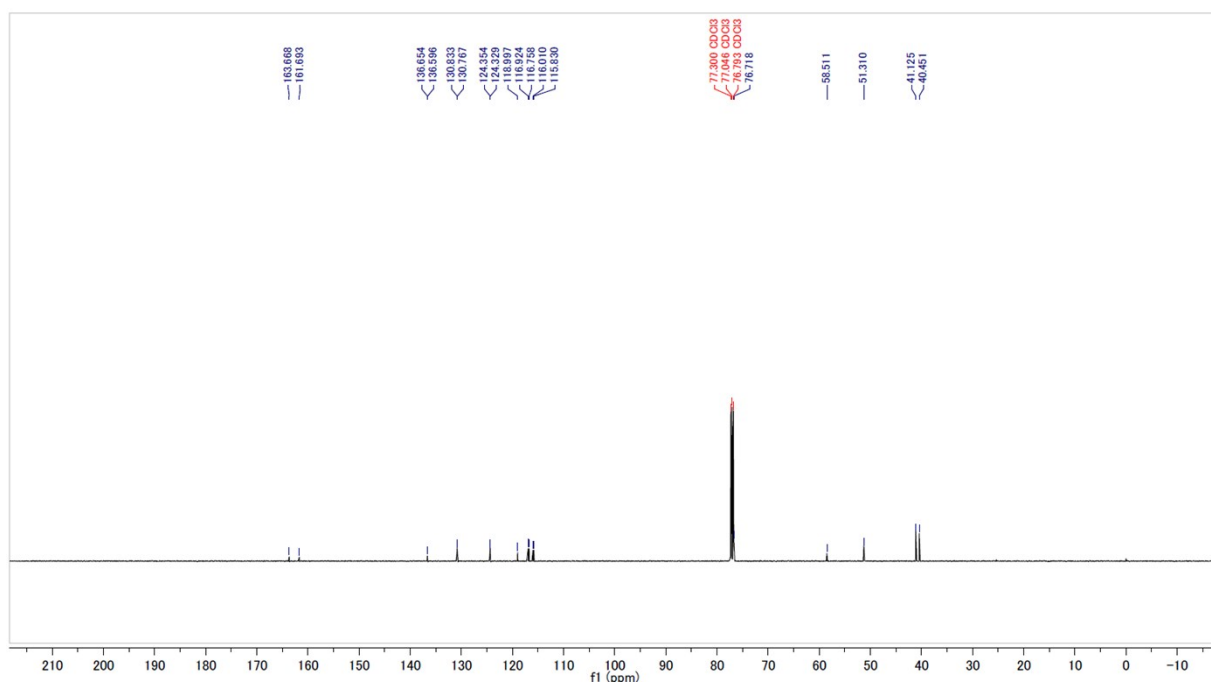

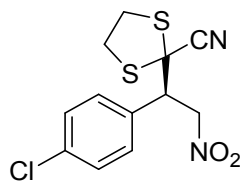

**3da**

<sup>1</sup>H NMR

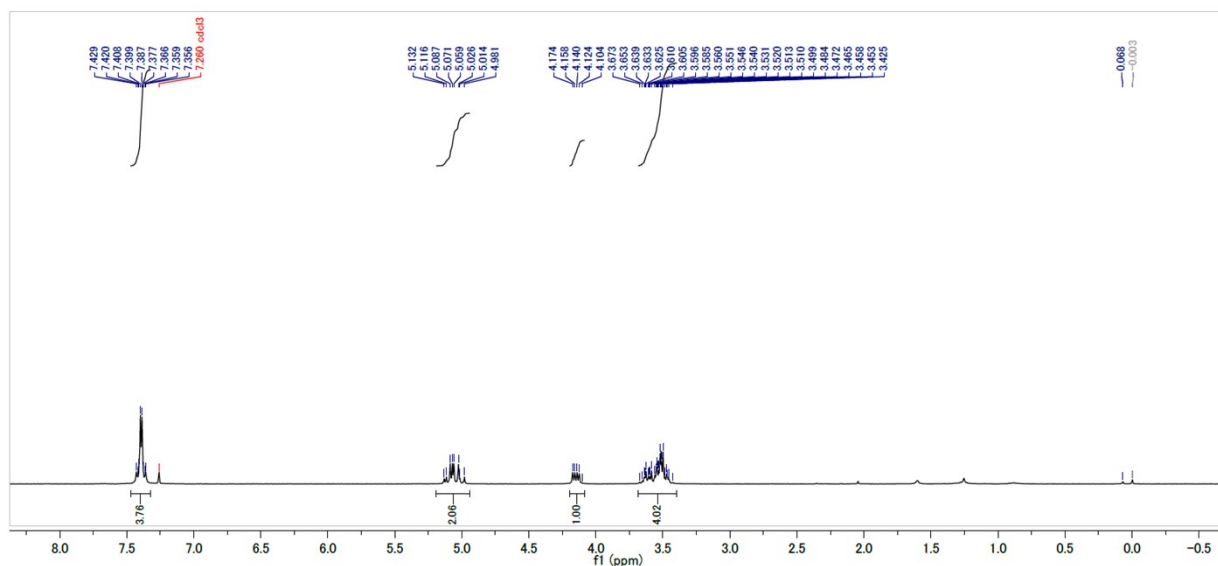

<sup>13</sup>C NMR

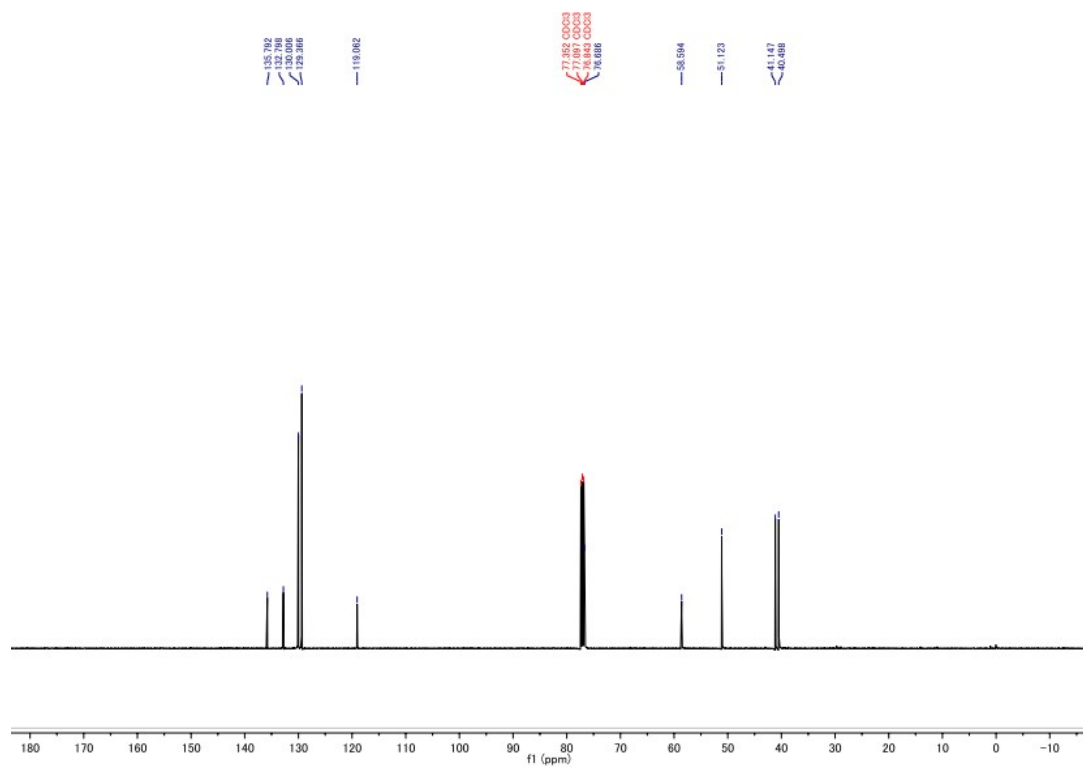

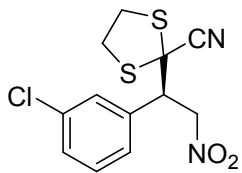

**3ea**

<sup>1</sup>H NMR

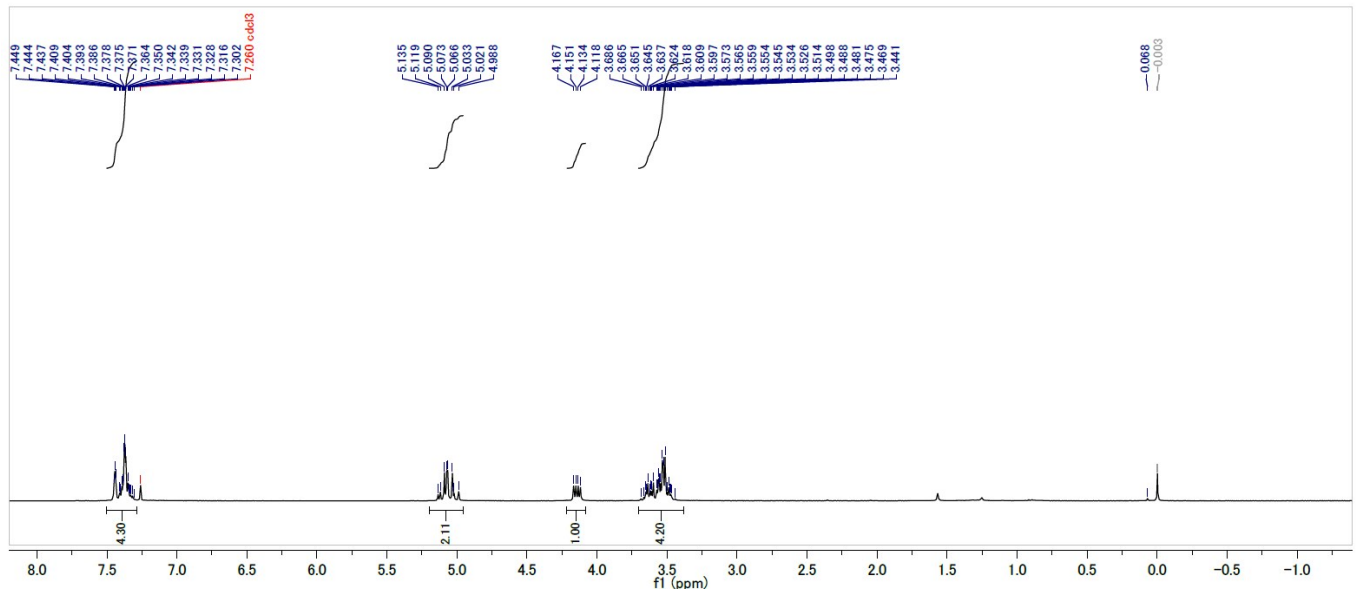

<sup>13</sup>C NMR

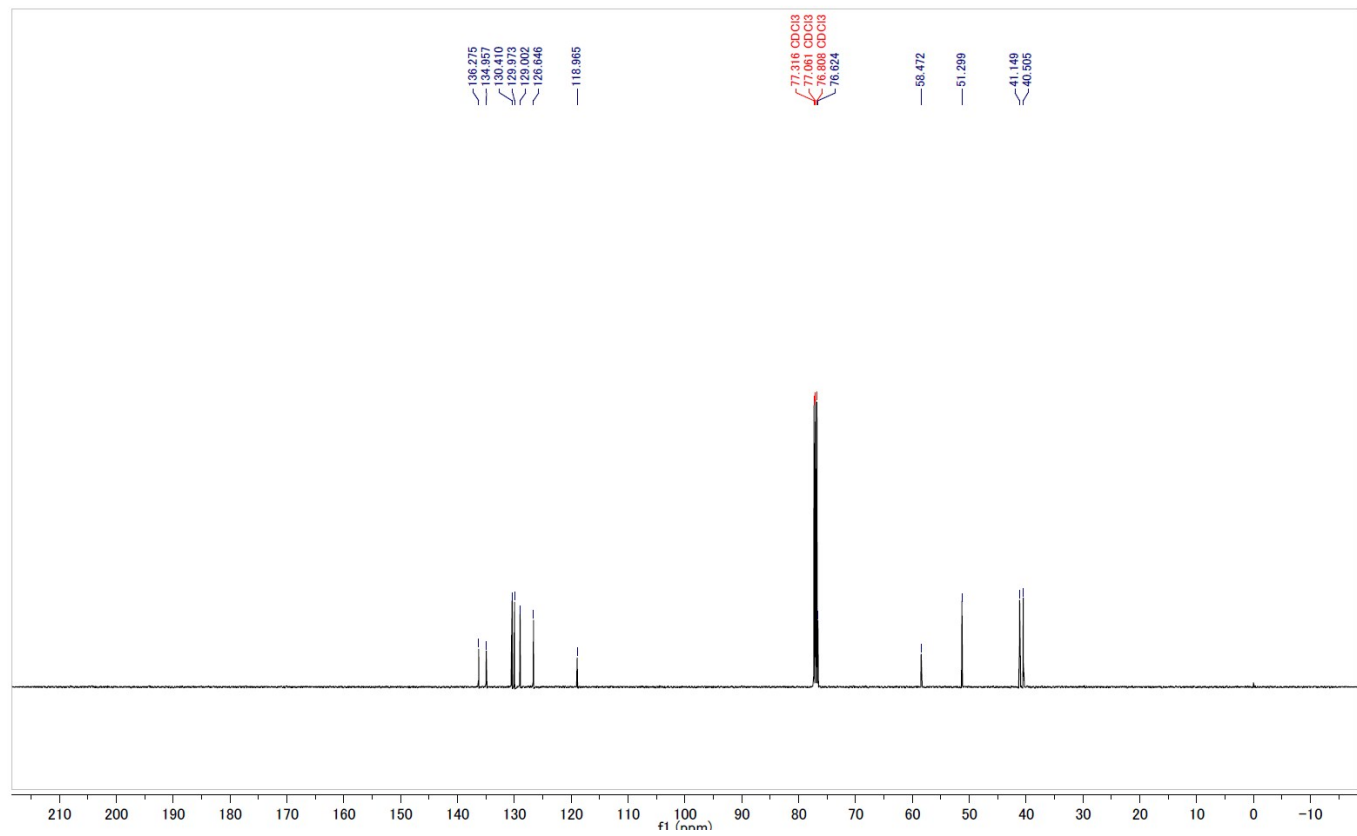



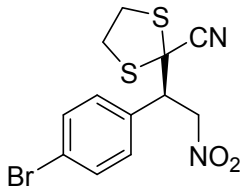

**3fa**

<sup>1</sup>H NMR

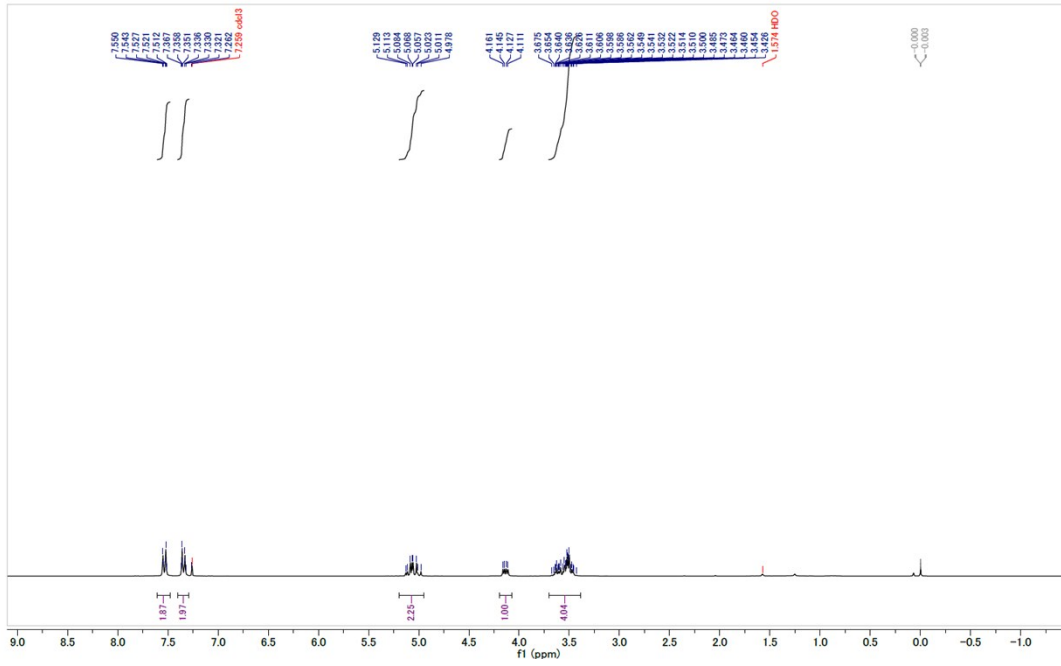

<sup>13</sup>C NMR

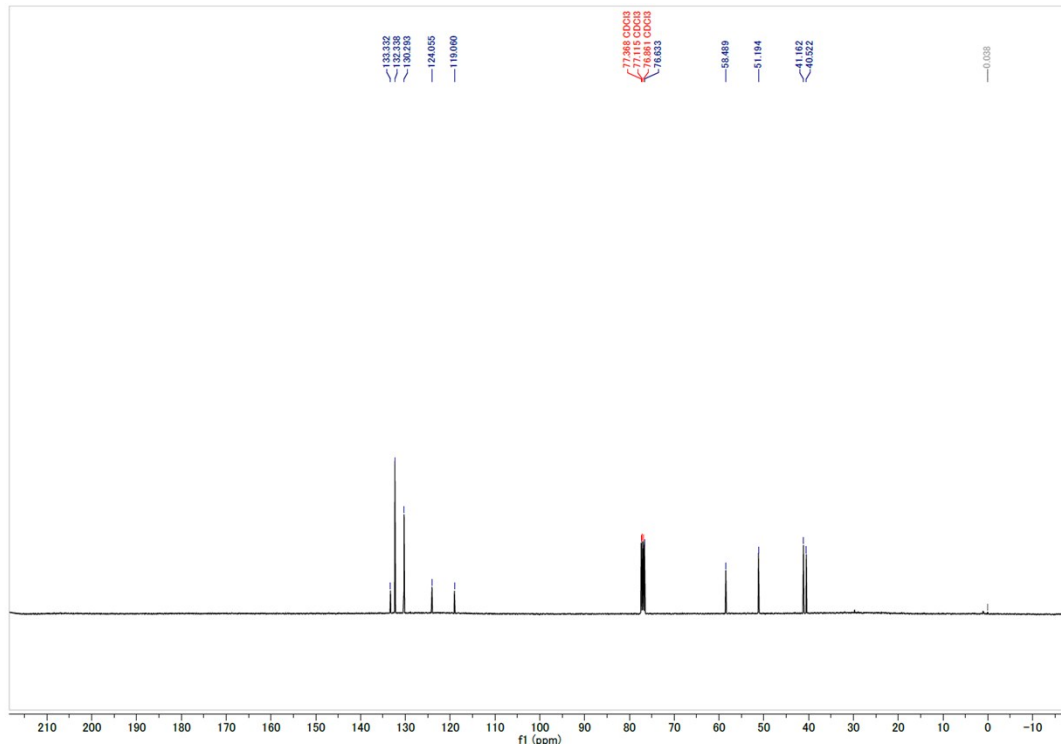

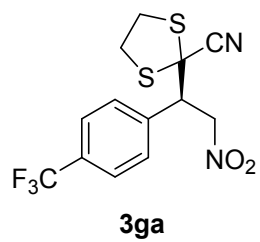

<sup>1</sup>H NMR

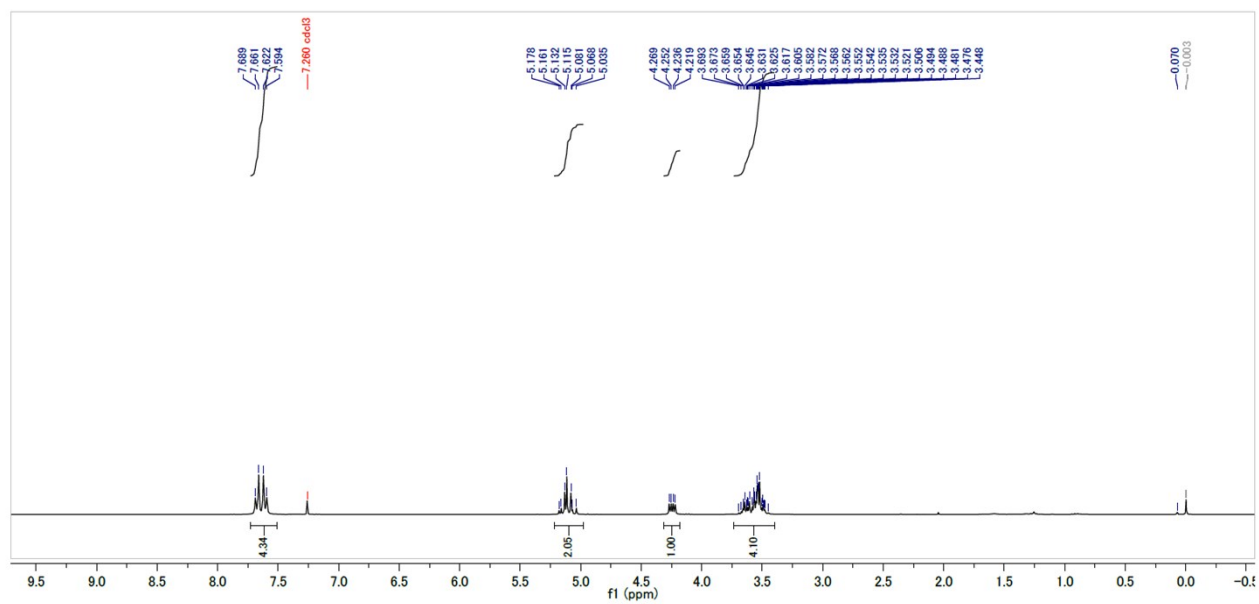

<sup>19</sup>F NMR

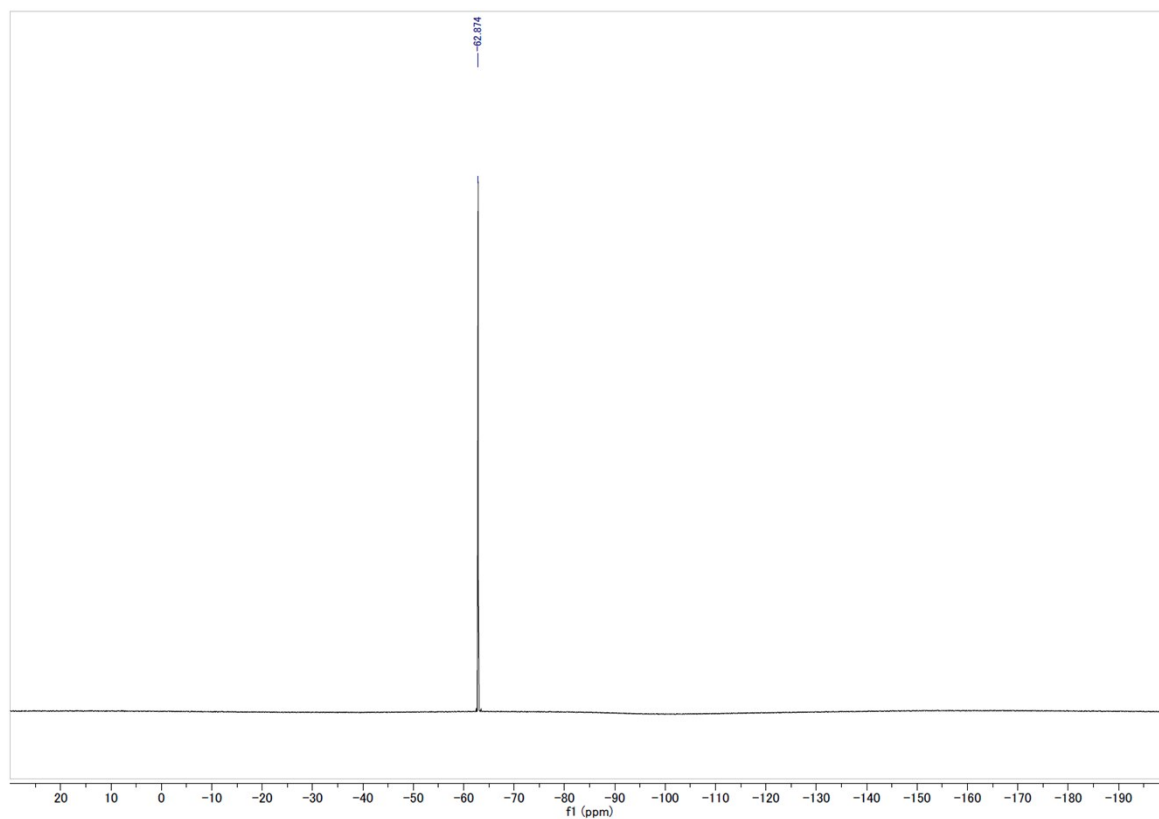

<sup>13</sup>C NMR

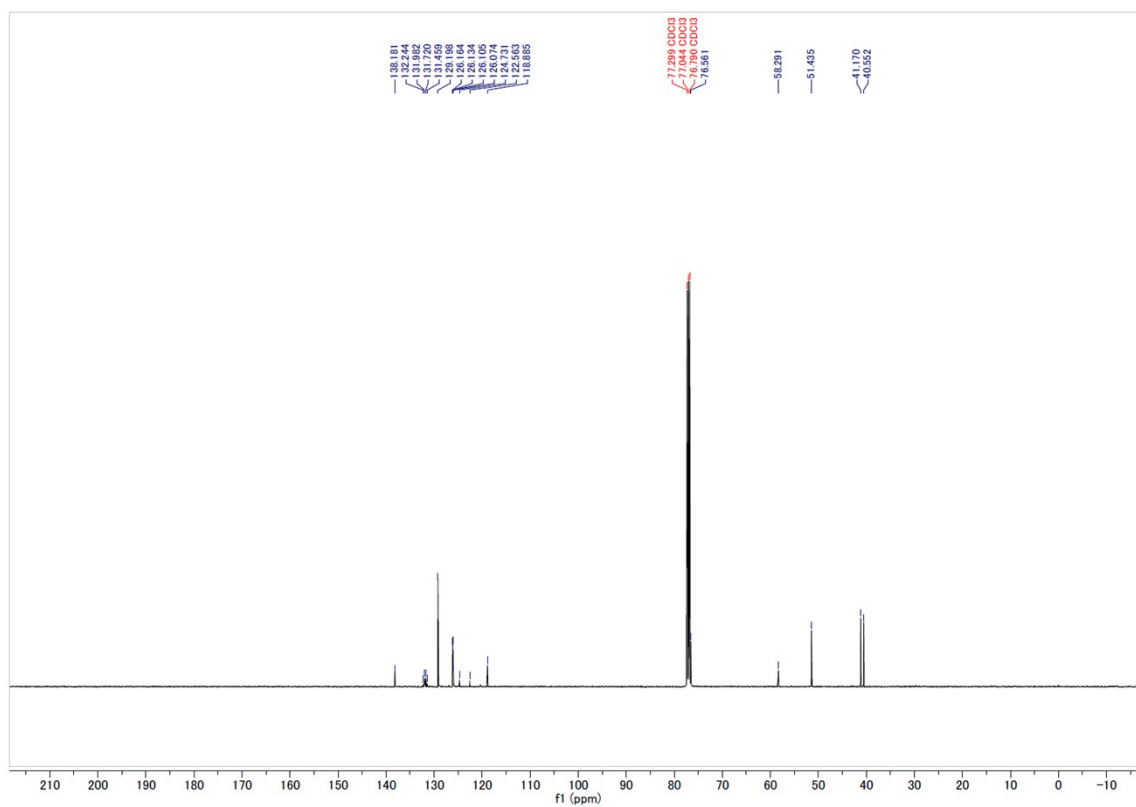

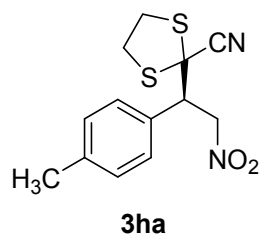

<sup>1</sup>H NMR

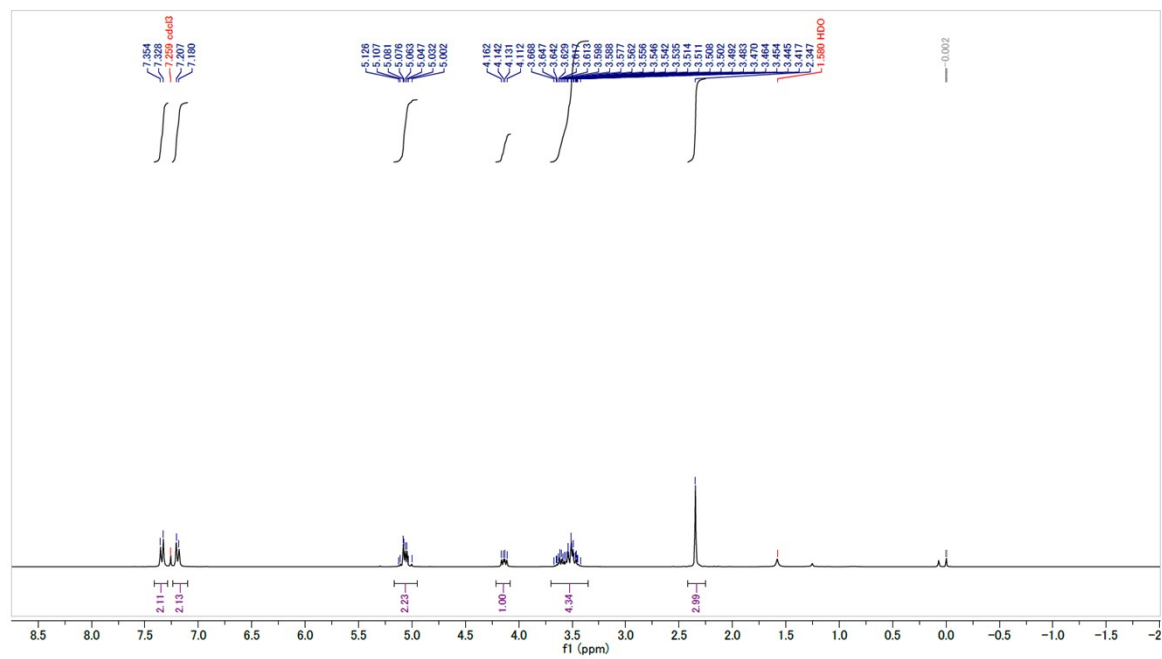

<sup>13</sup>C NMR

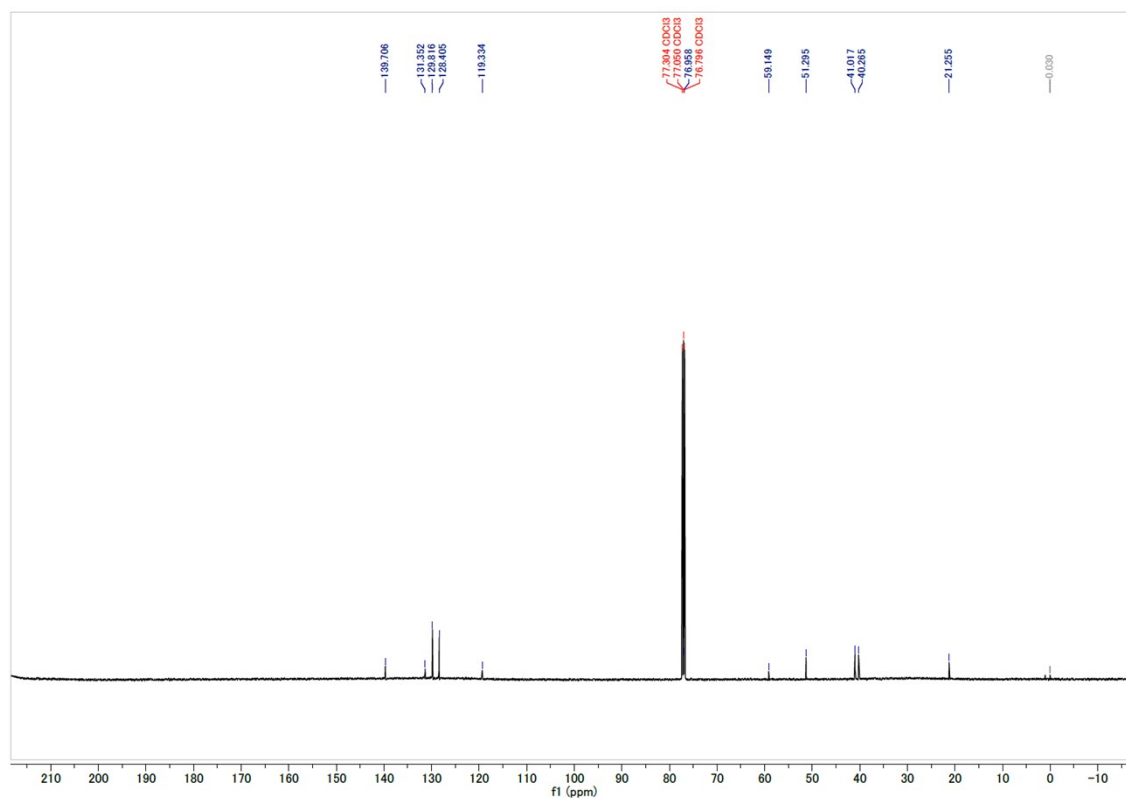

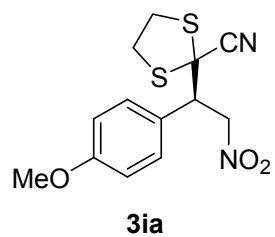

<sup>1</sup>H NMR

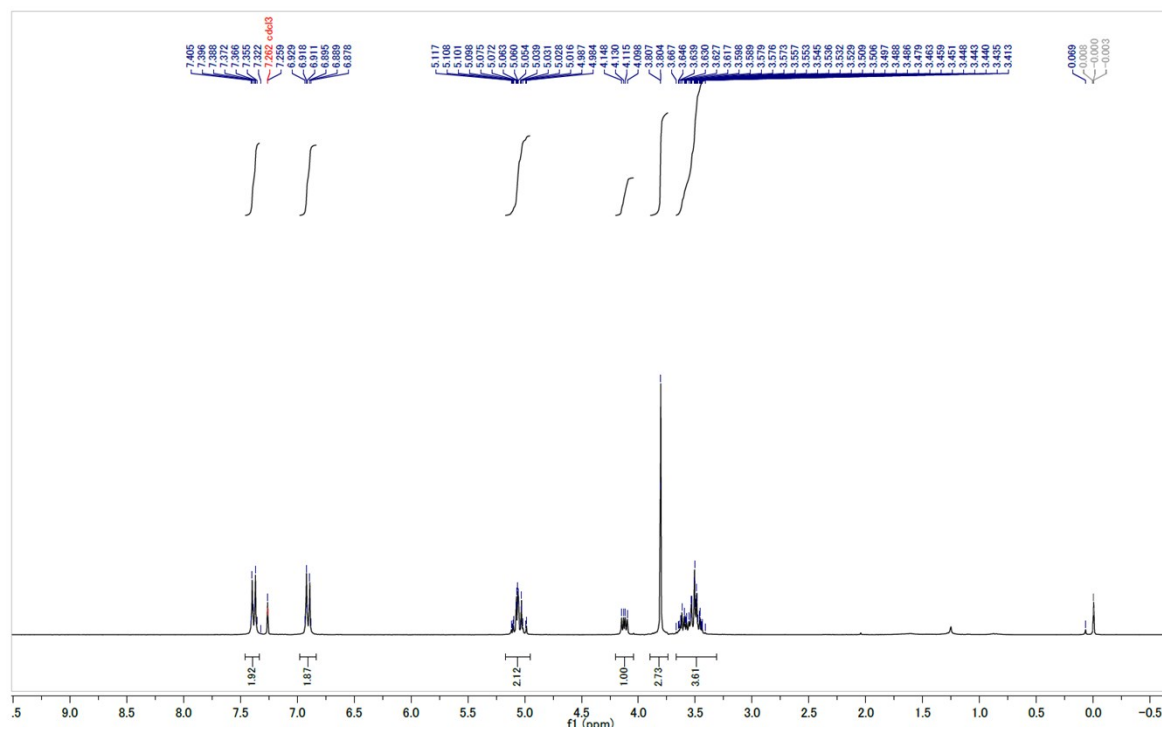

<sup>13</sup>C NMR

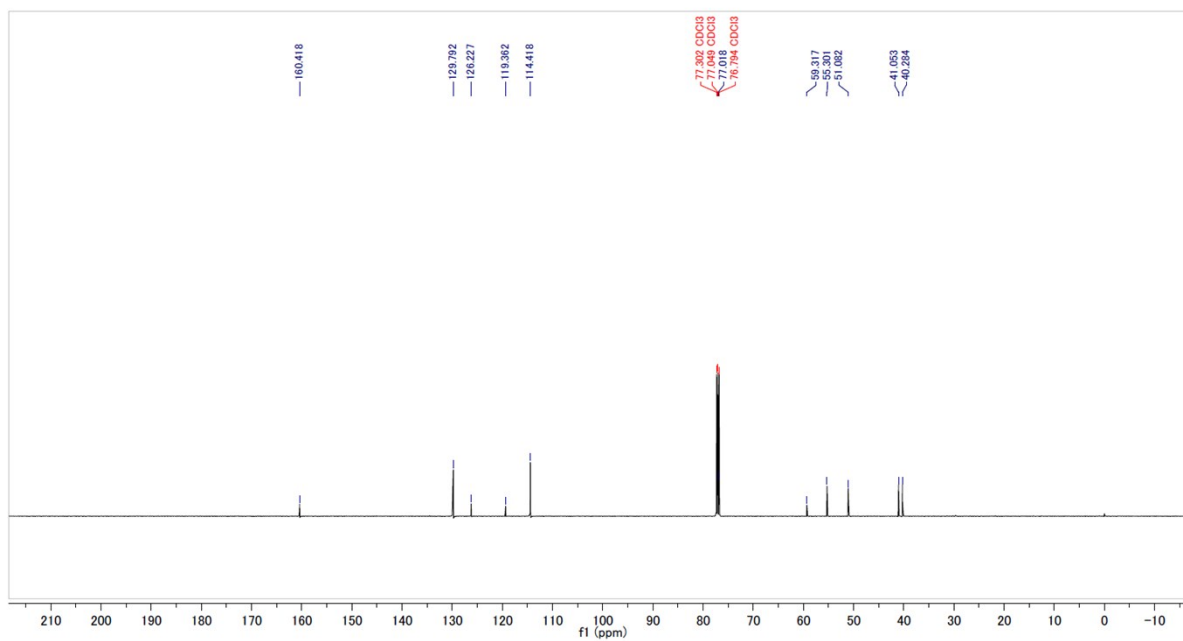

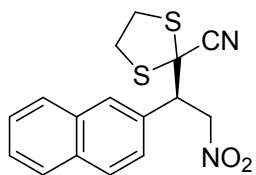

**3ja**

<sup>1</sup>H NMR

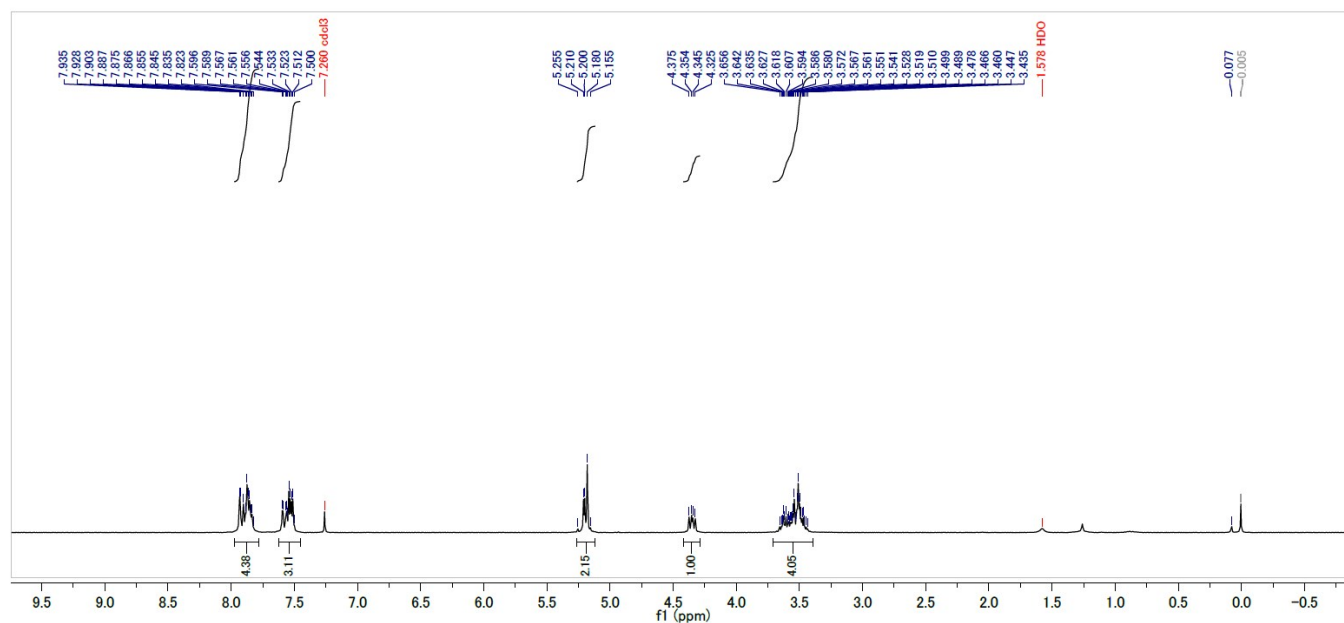

<sup>13</sup>C NMR

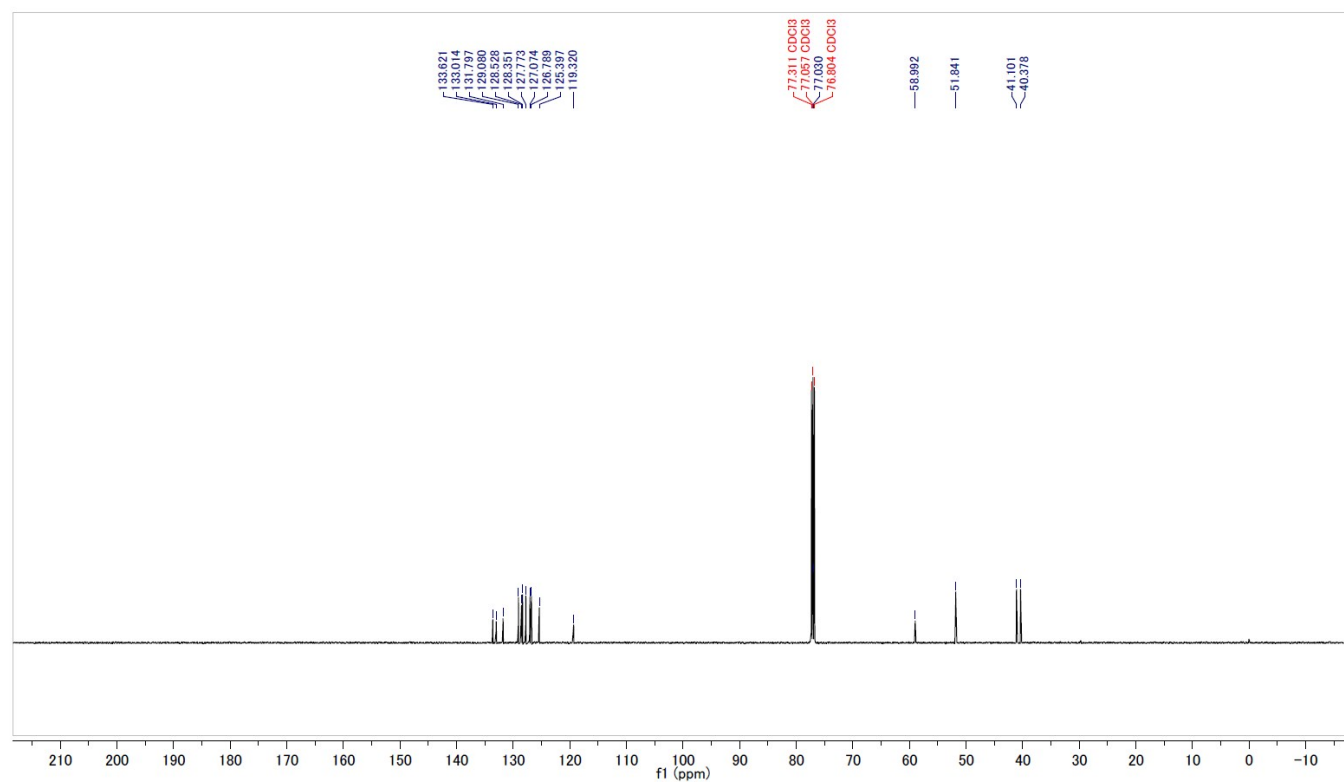

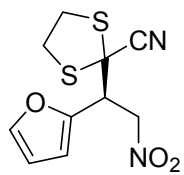

**3ka**

<sup>1</sup>H NMR

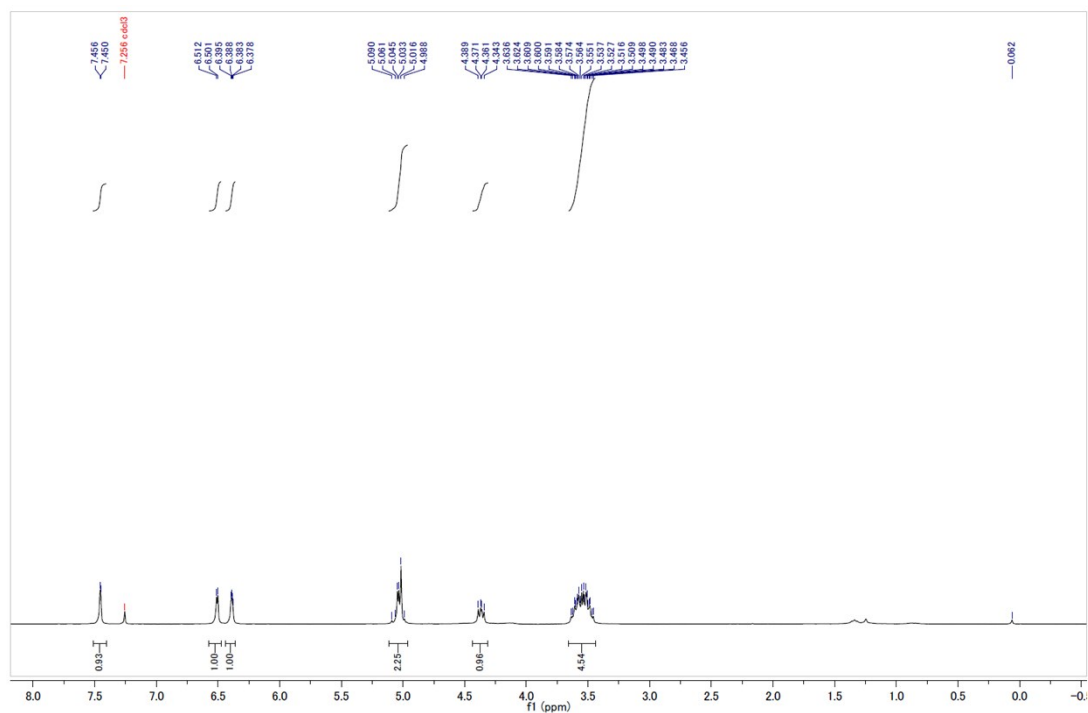

<sup>13</sup>C NMR

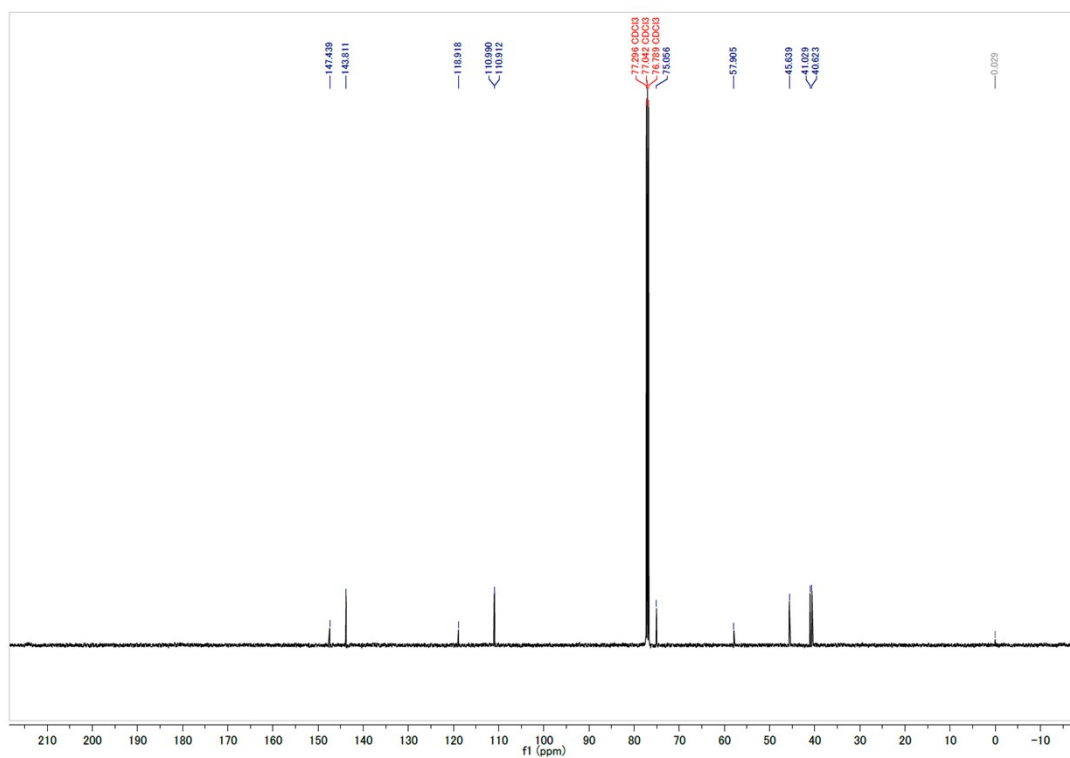

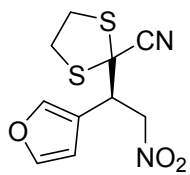

**3la**

<sup>1</sup>H NMR

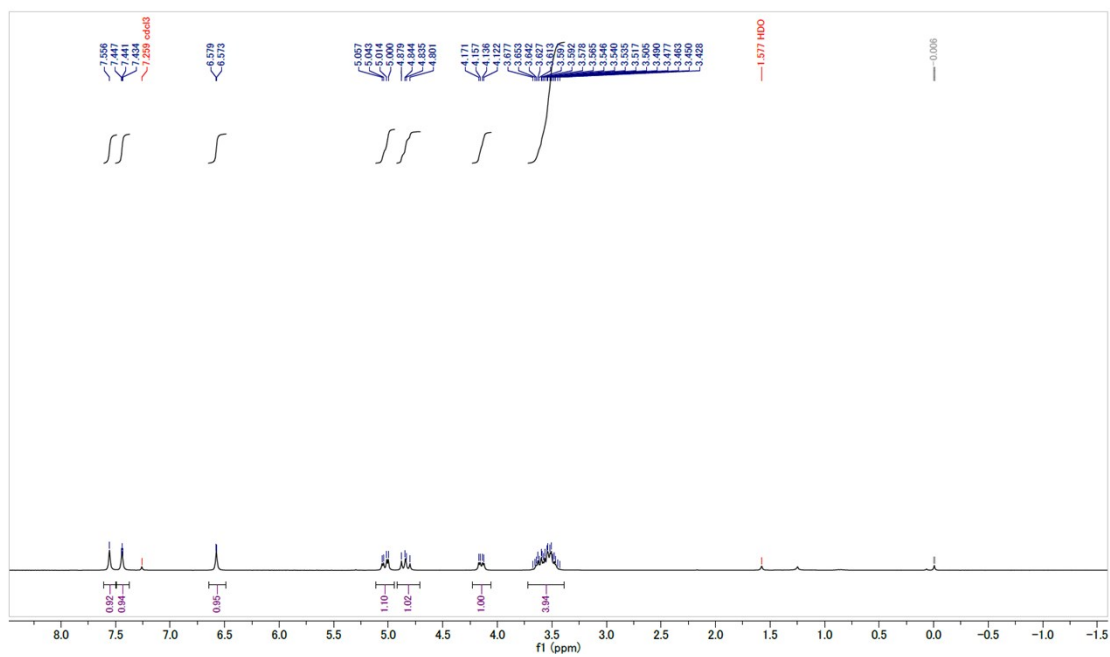

<sup>13</sup>C NMR

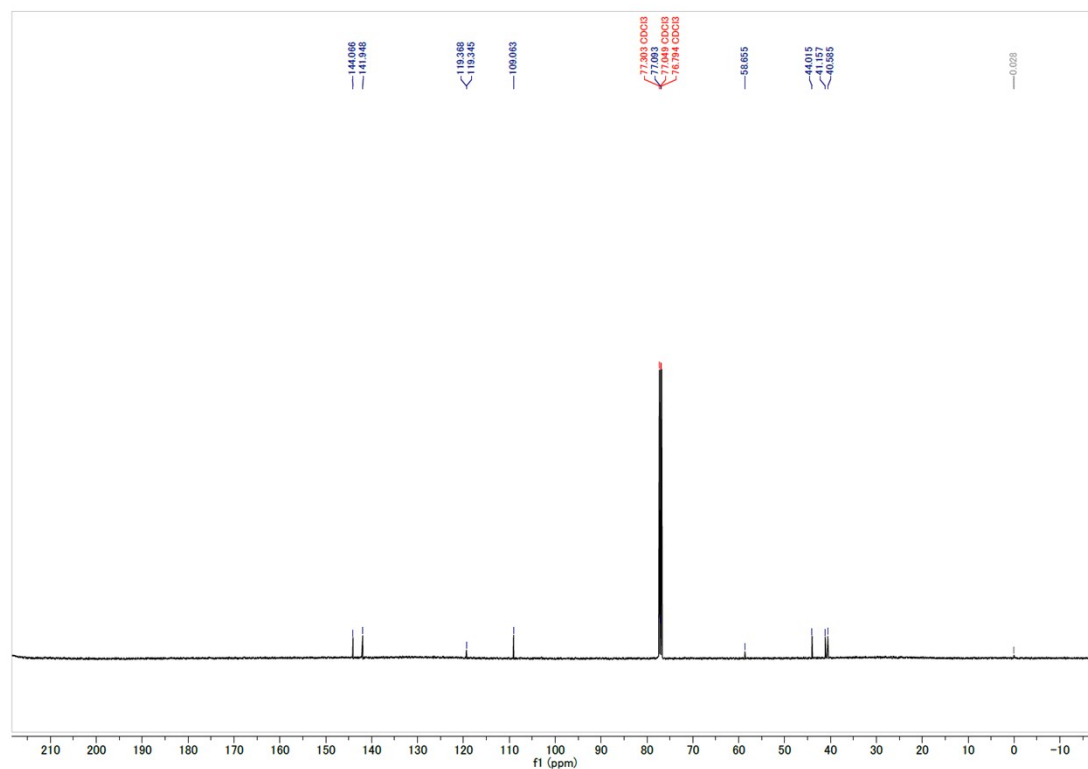



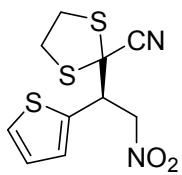

3ma

<sup>1</sup>H NMR

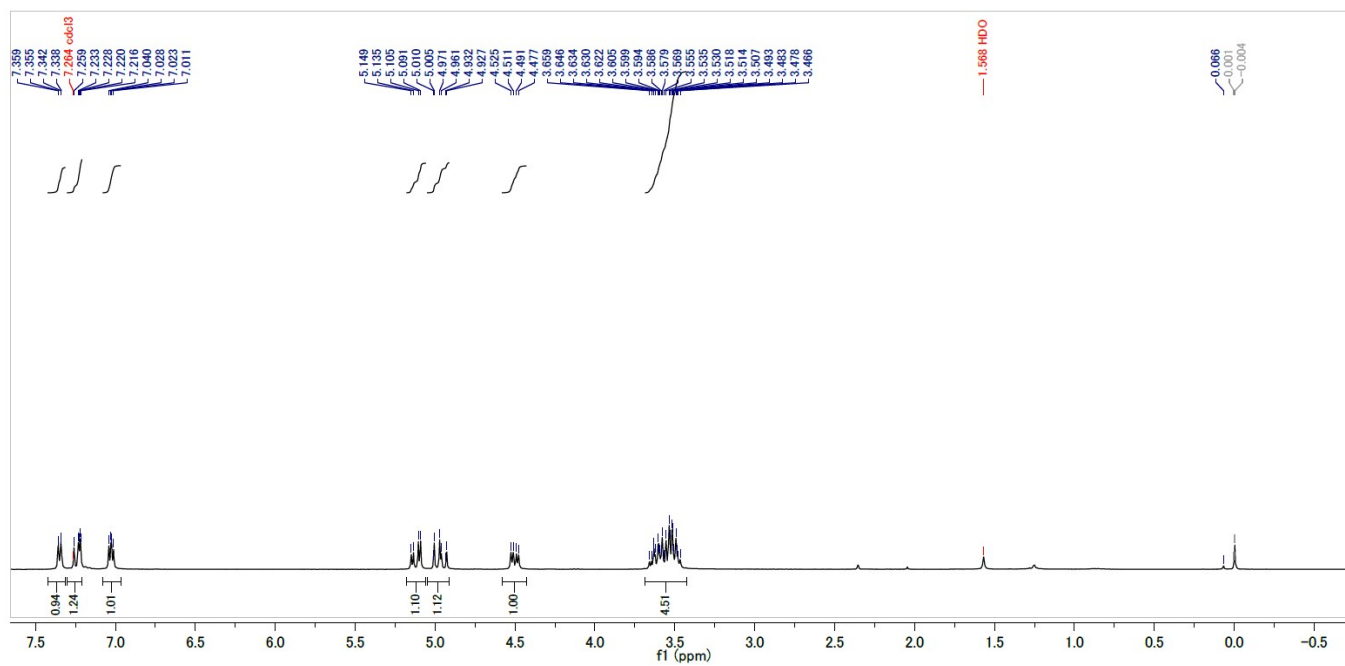

<sup>13</sup>C NMR

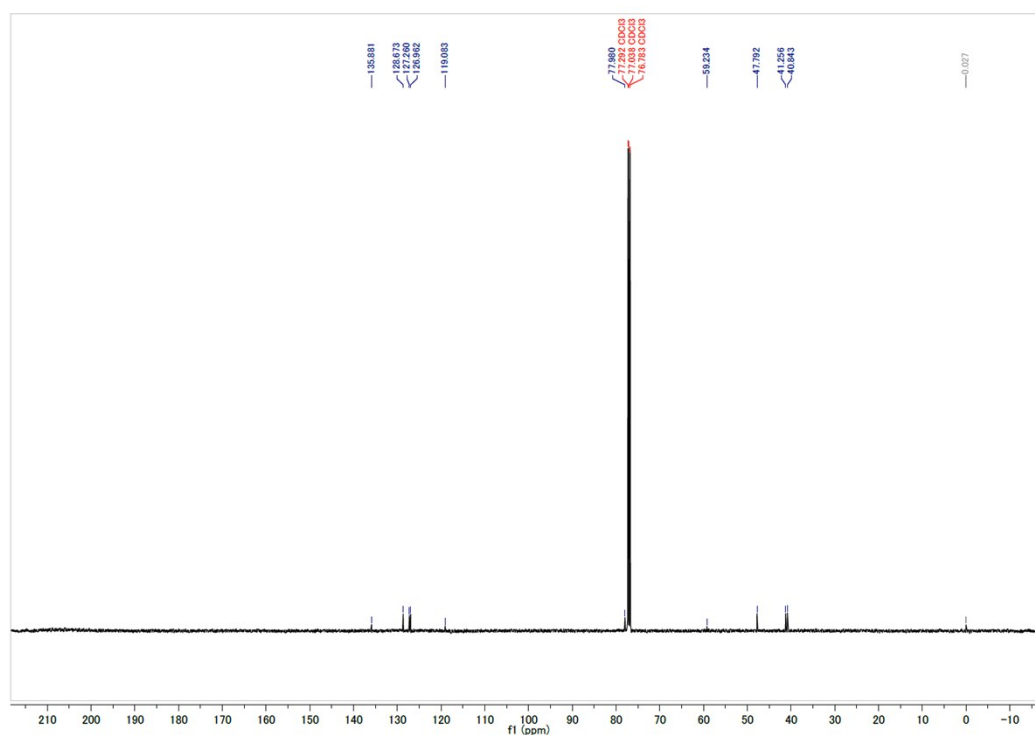

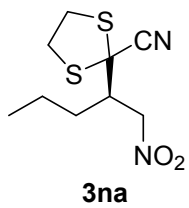

$^1\text{H NMR}$

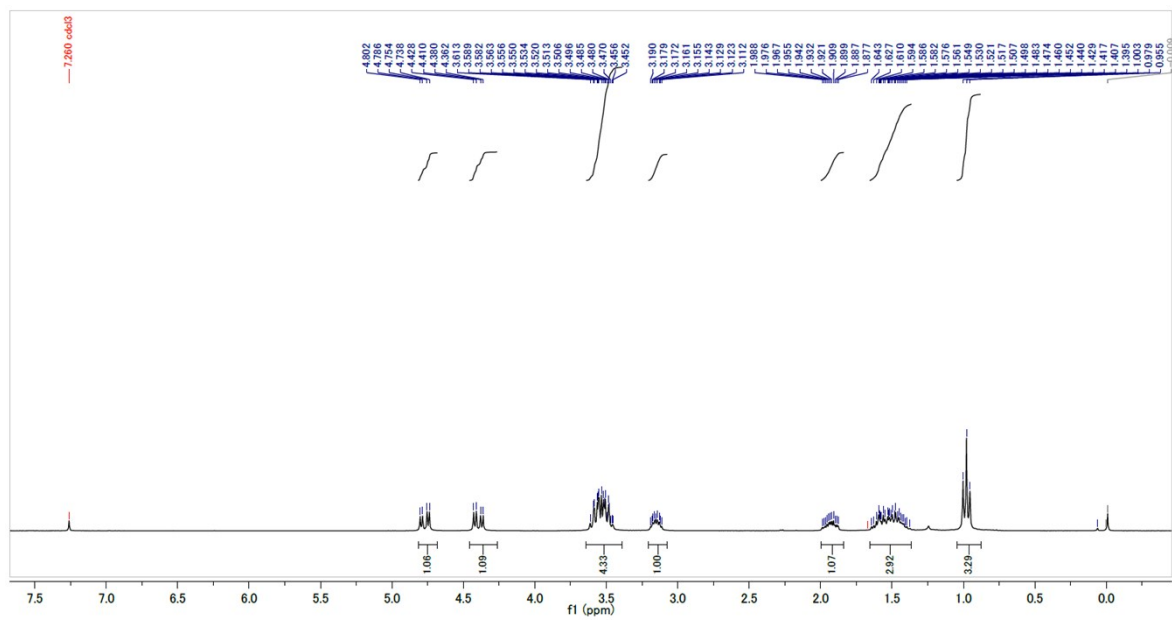

$^{13}\text{C NMR}$

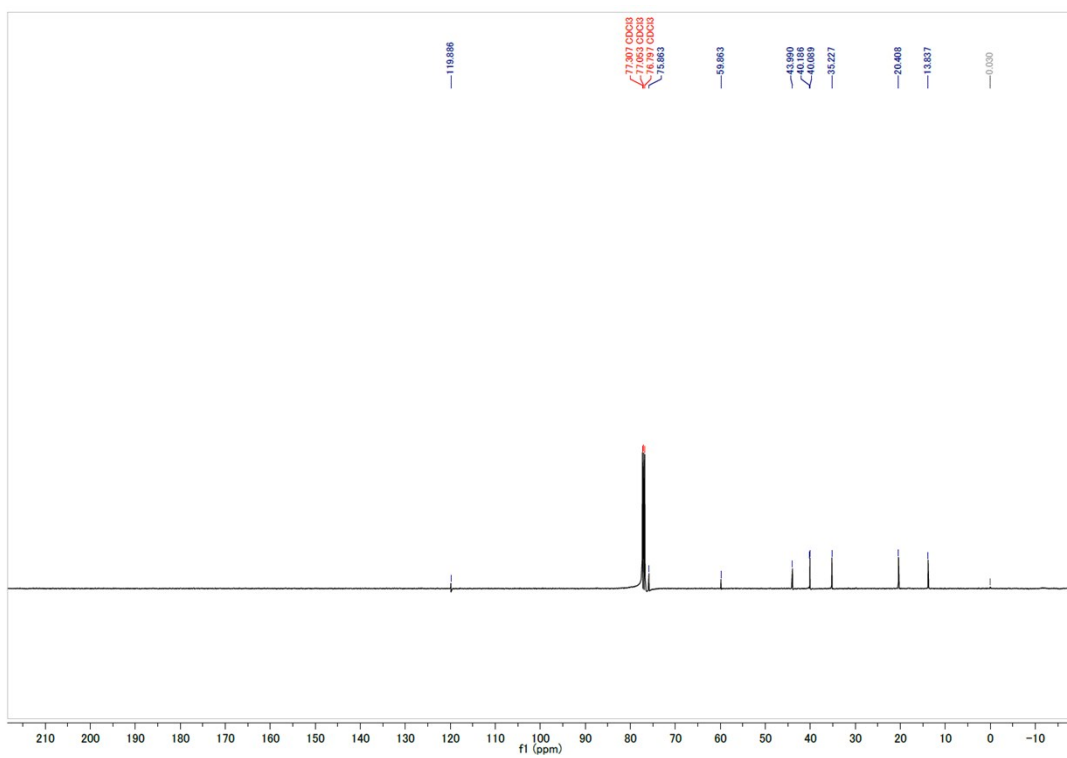

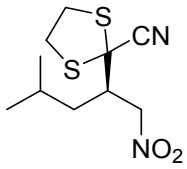

**3oa**

<sup>1</sup>H NMR

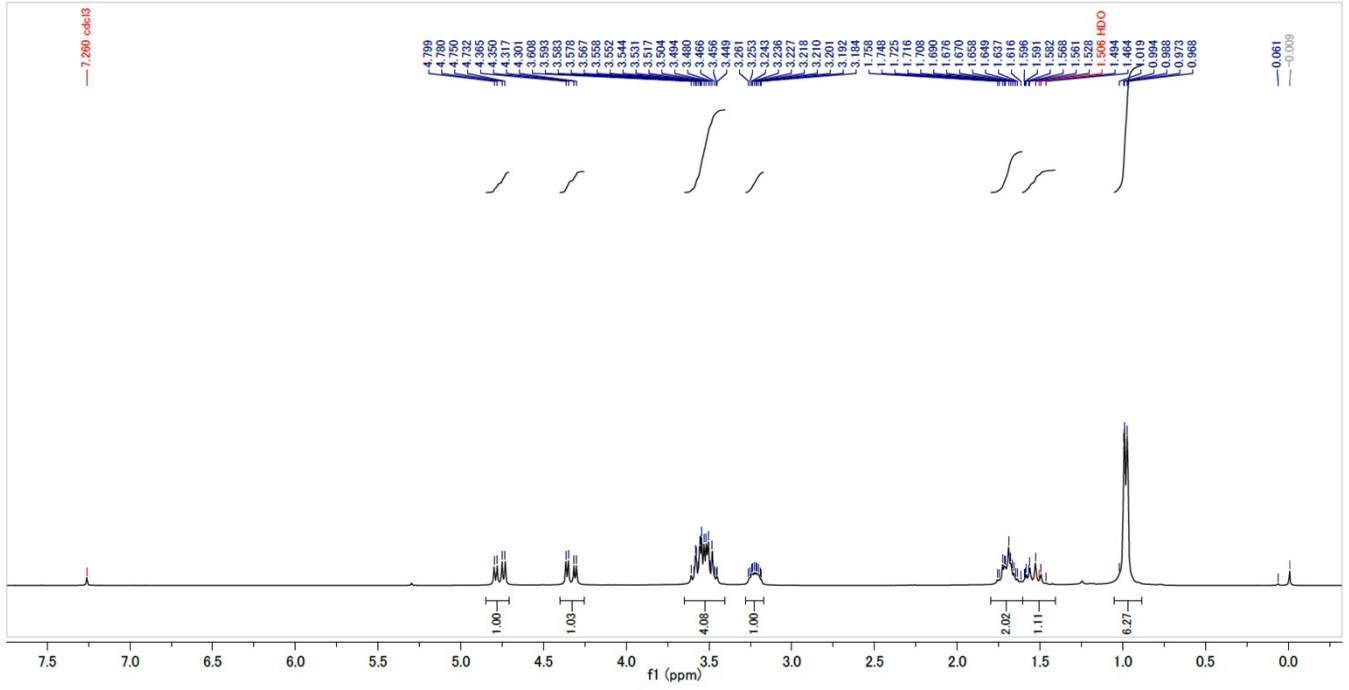

<sup>13</sup>C NMR

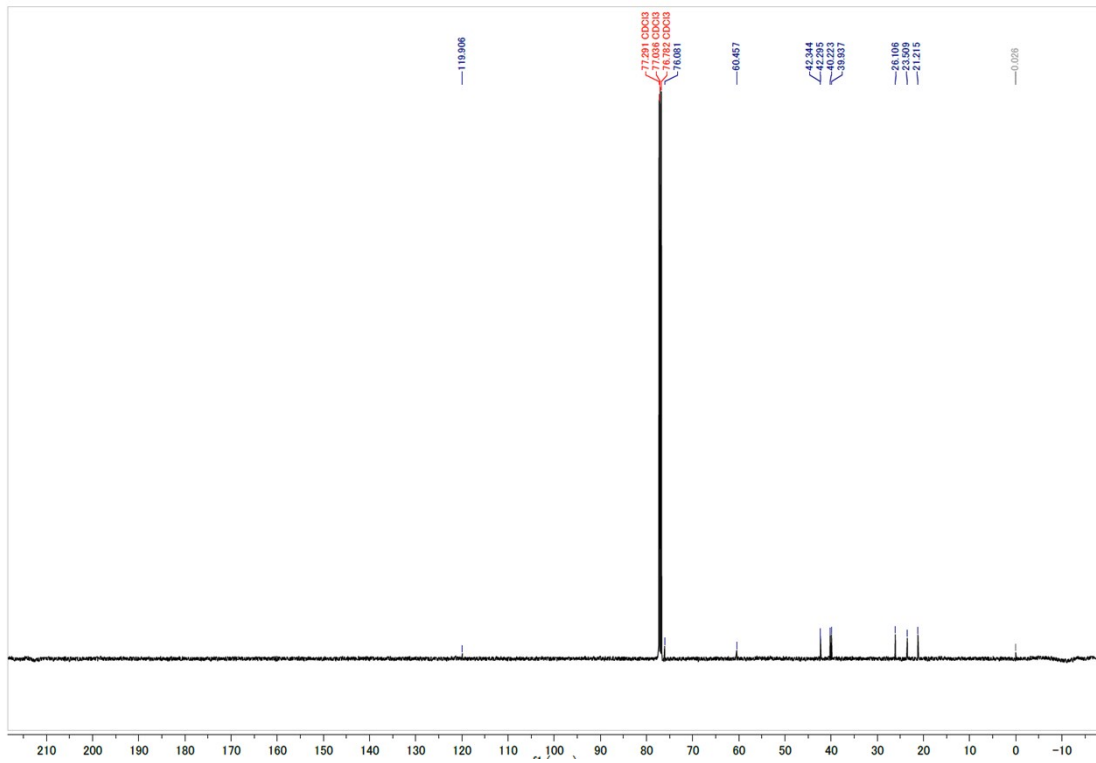

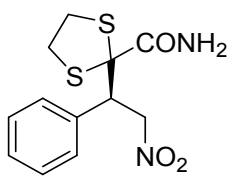

5

<sup>1</sup>H NMR

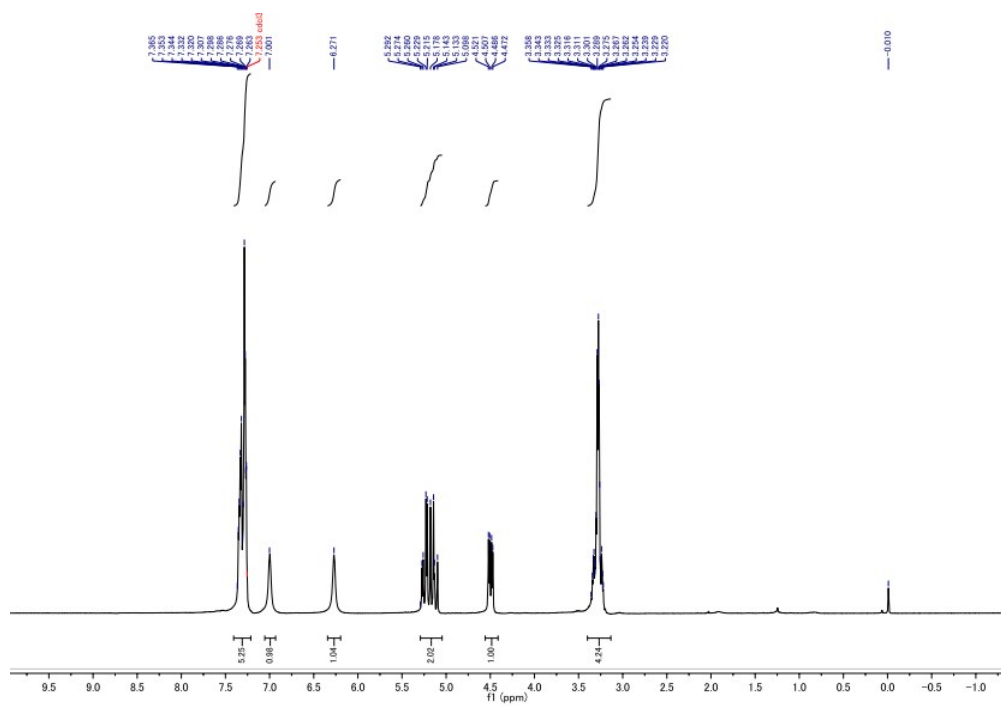

<sup>13</sup>C NMR

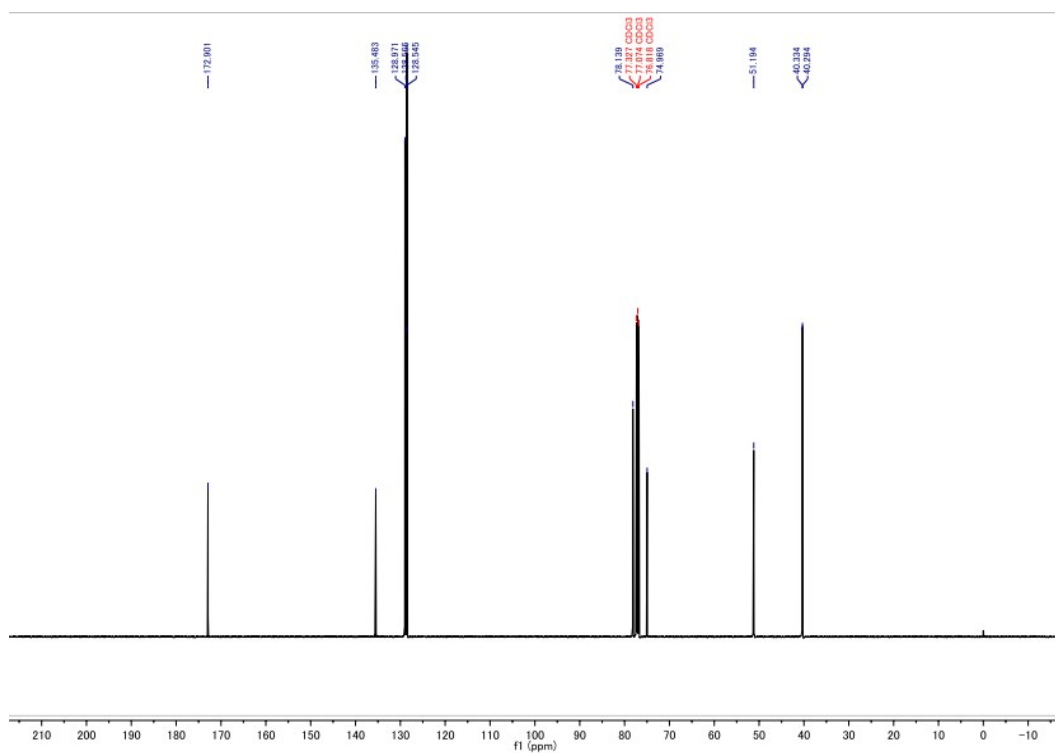

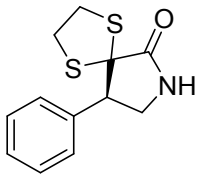

6

<sup>1</sup>H NMR

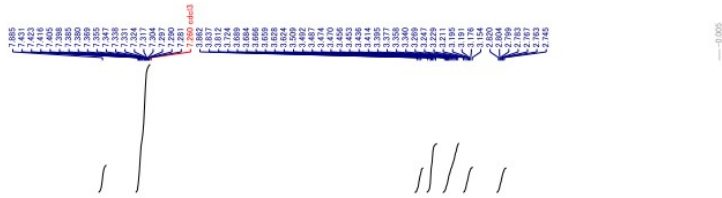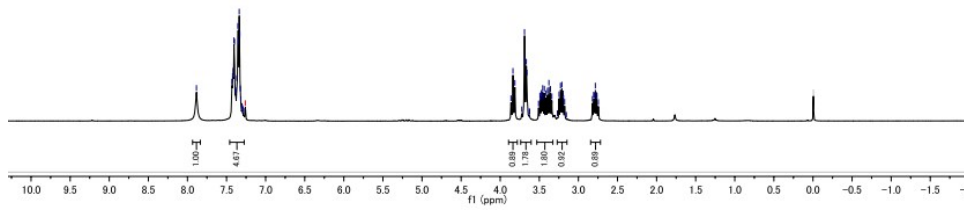

<sup>13</sup>C NMR

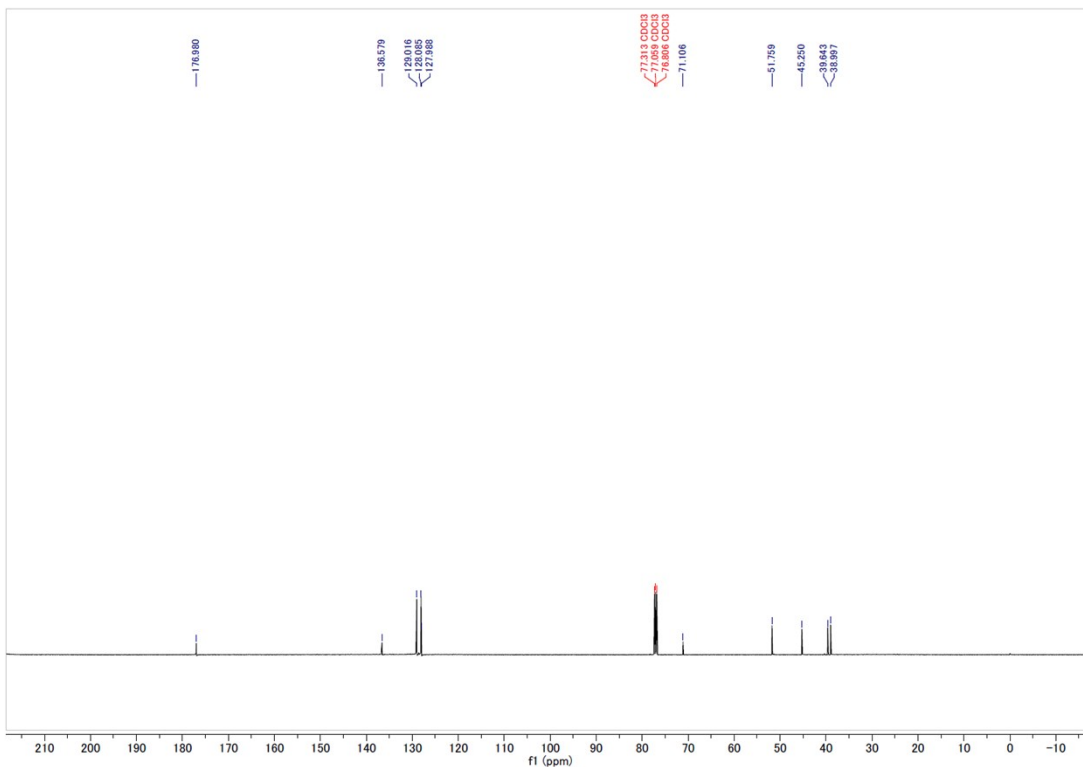

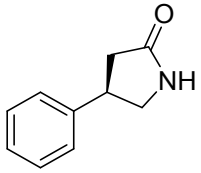

7

### <sup>1</sup>H NMR

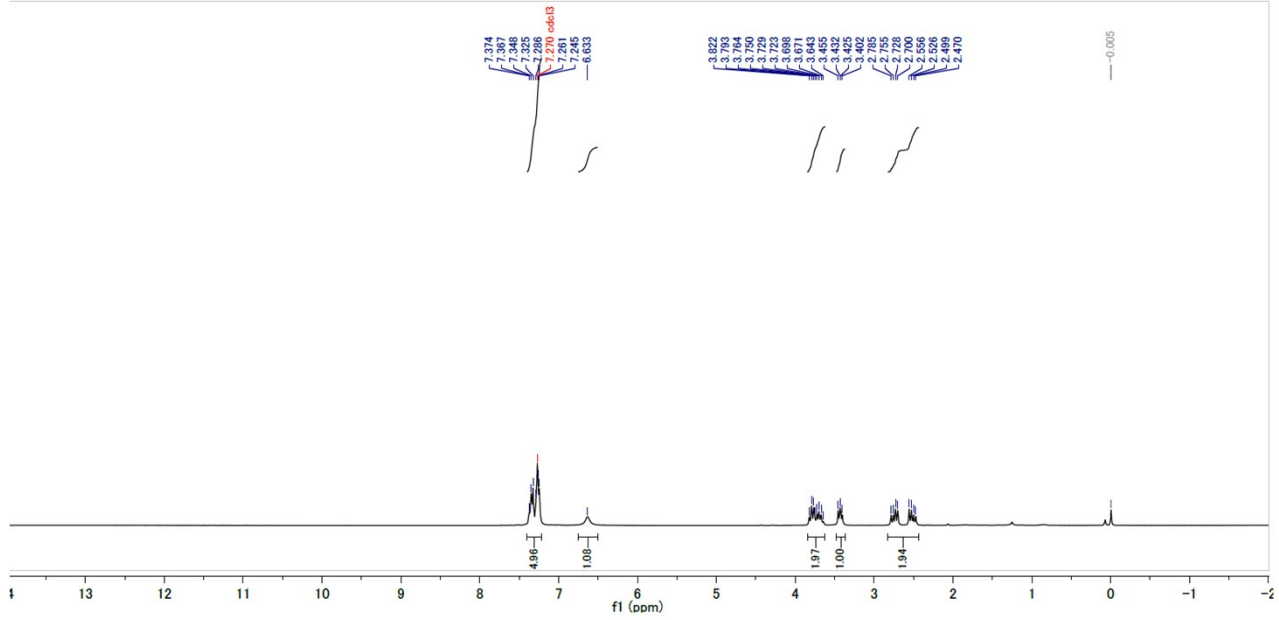

### <sup>13</sup>C NMR

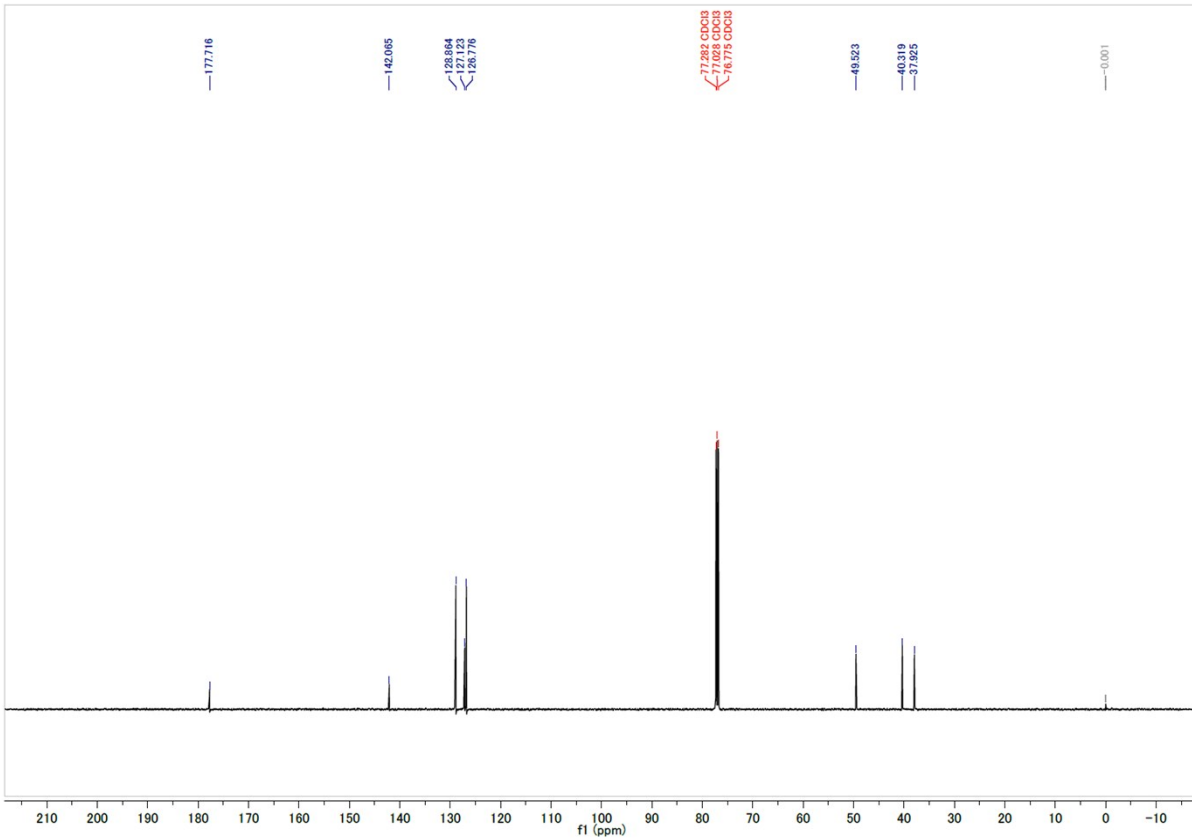

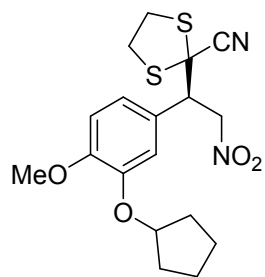

8

<sup>1</sup>H NMR

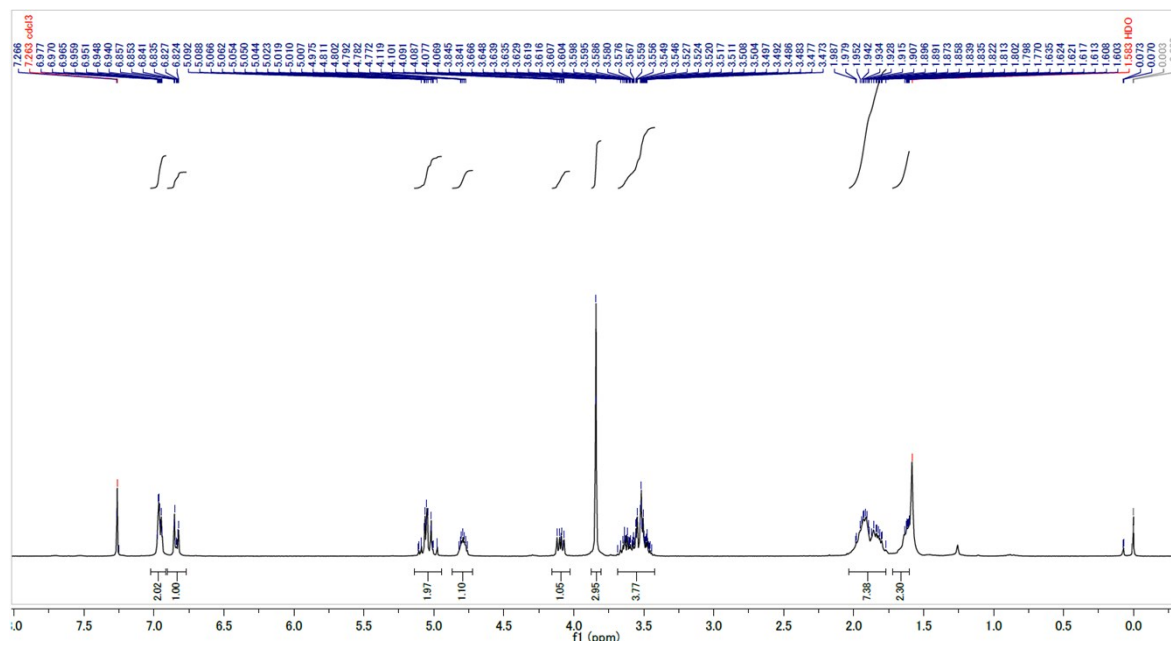

<sup>13</sup>C NMR

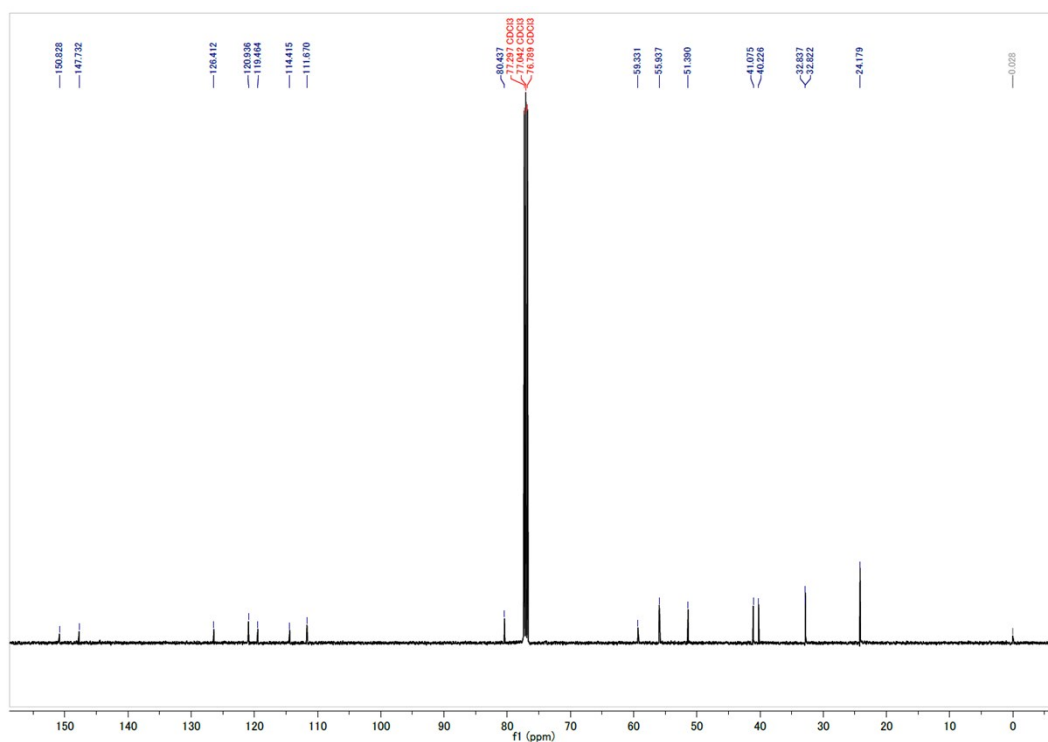

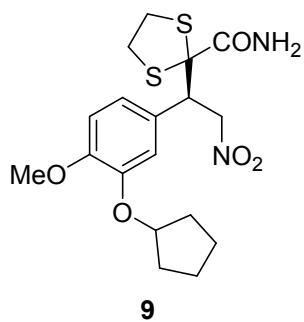

<sup>1</sup>H NMR

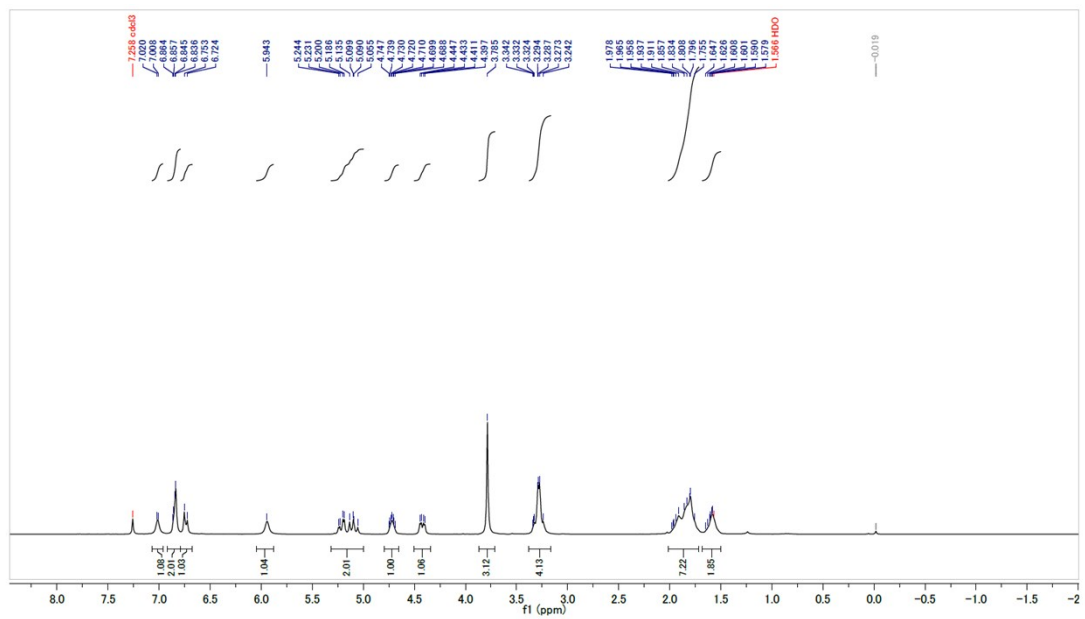

<sup>13</sup>C NMR

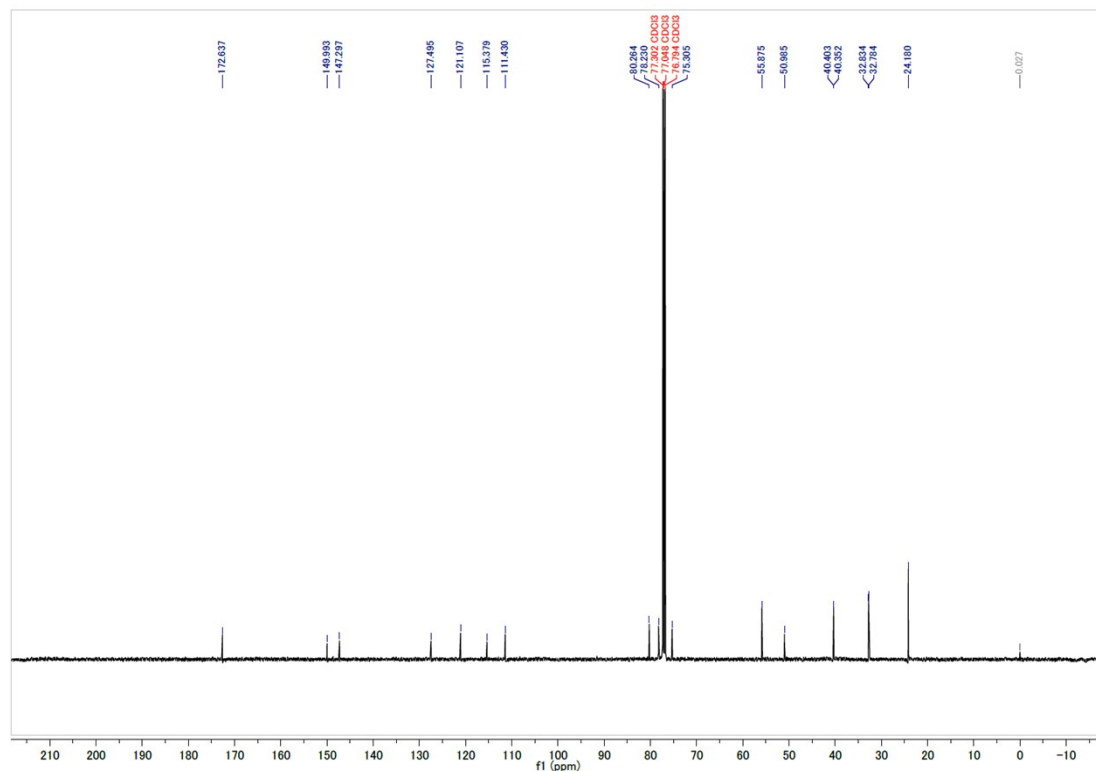



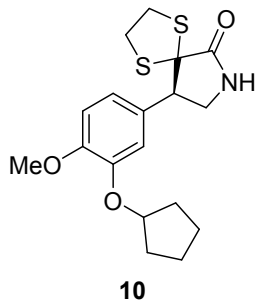

<sup>1</sup>H NMR

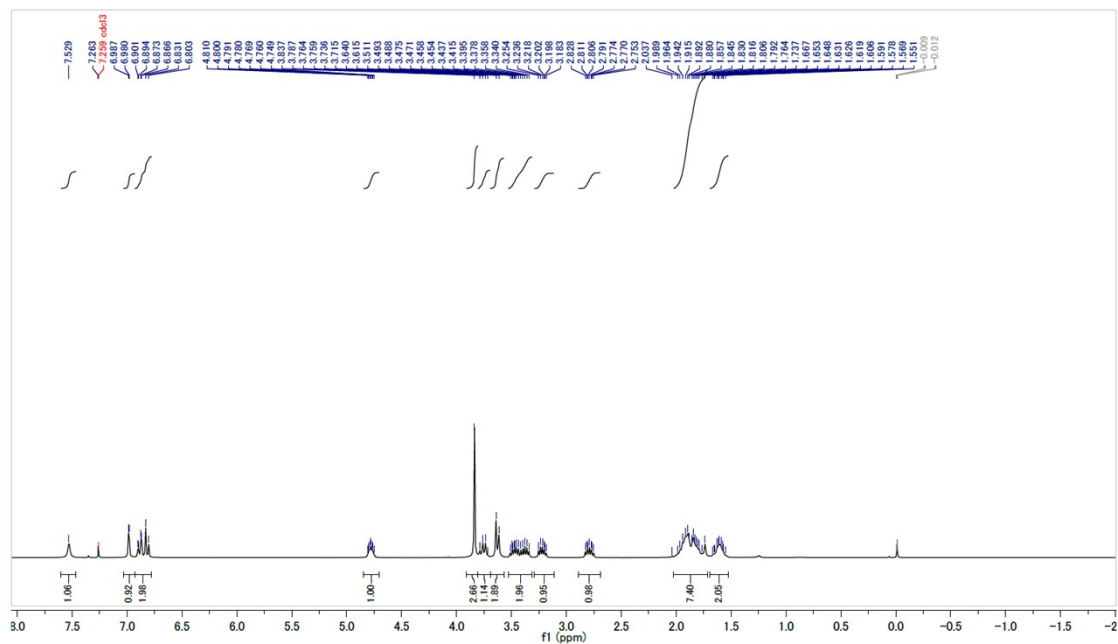

<sup>13</sup>C NMR

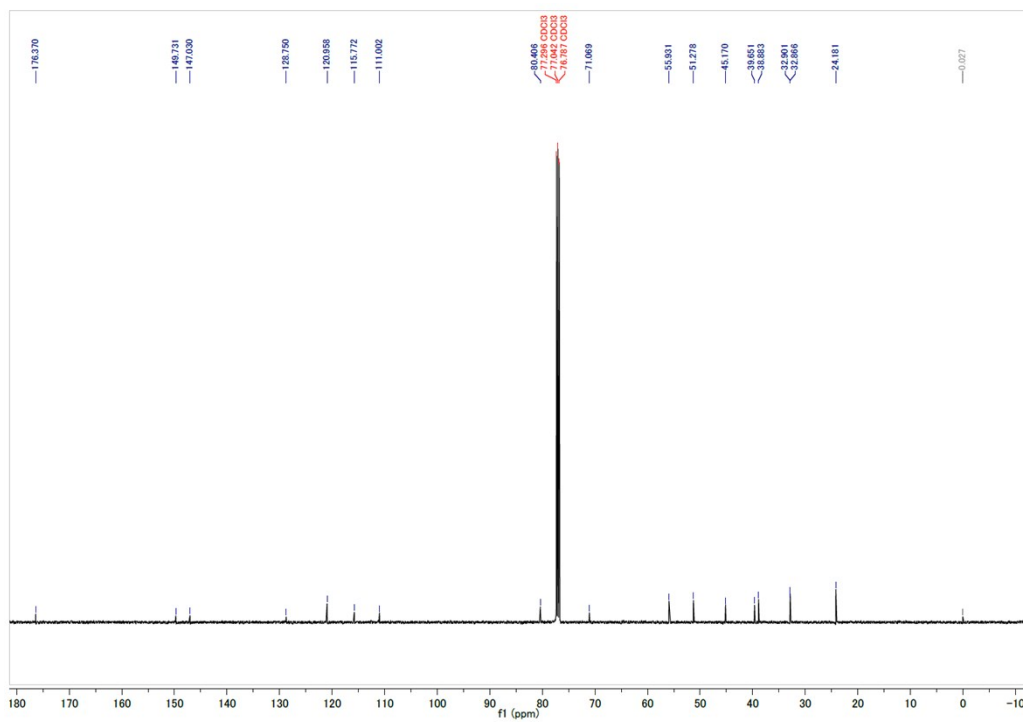

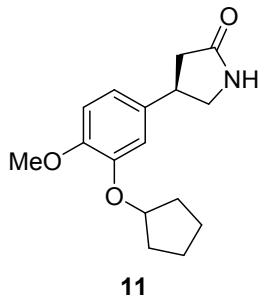

<sup>1</sup>H NMR

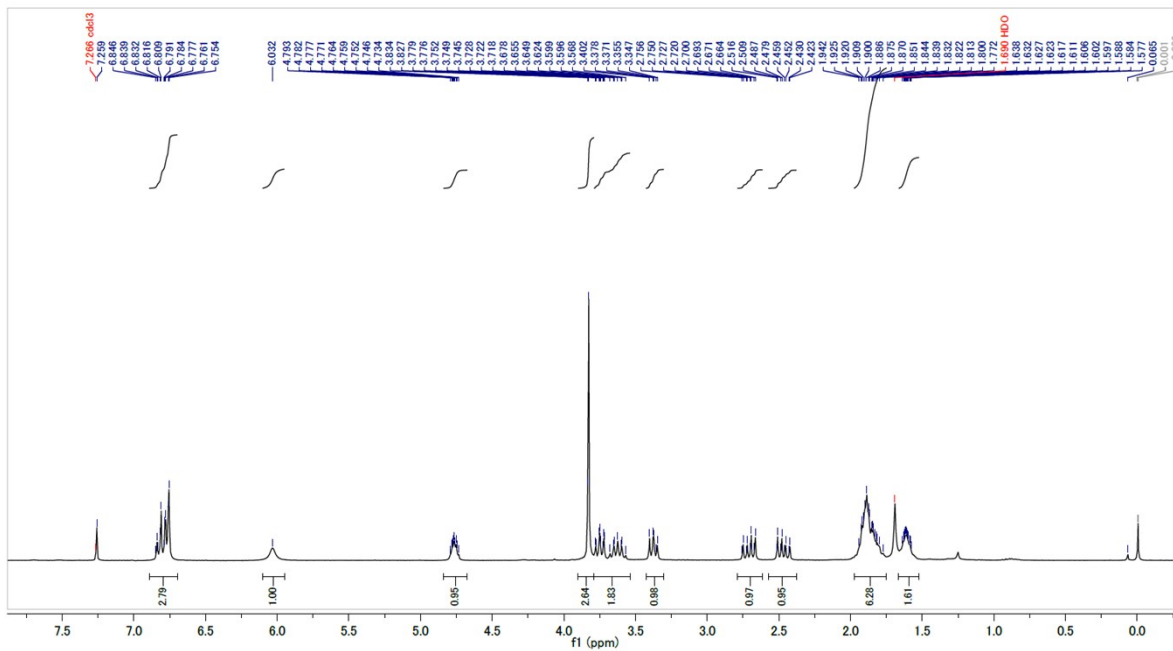

<sup>13</sup>C NMR

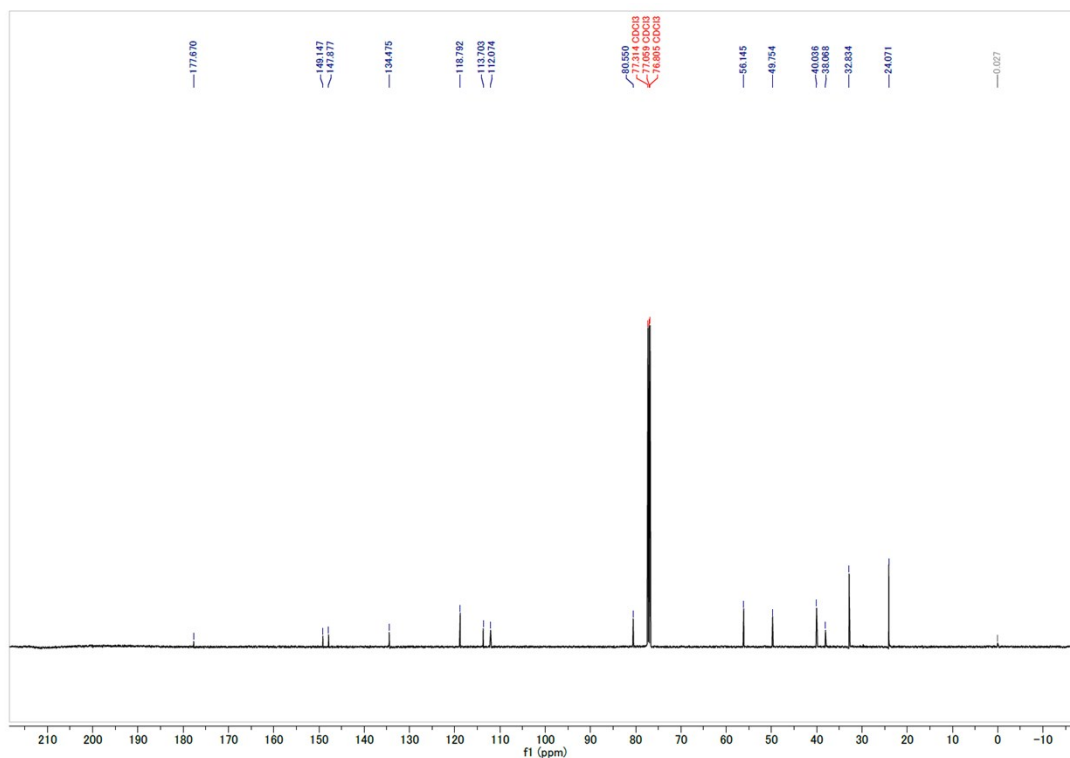

## HPLC Chart

### (3*R*)-2-[(1,3-Dithiolane)-2-yl]-4-nitro-3-phenylbutanenitrile (**3aa**)

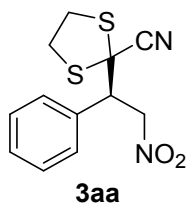

#### racemic-**3aa**

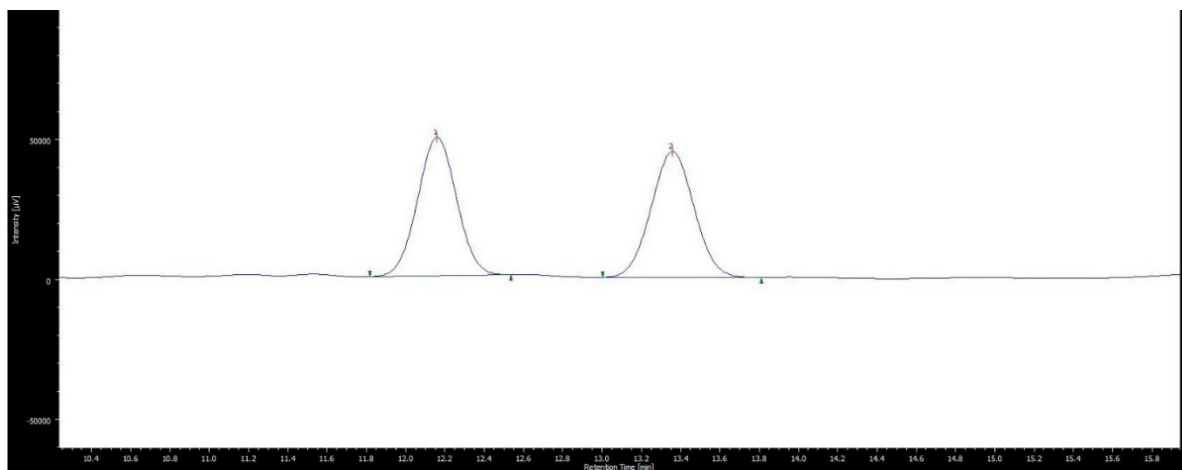

#### (*R*)-**3aa**

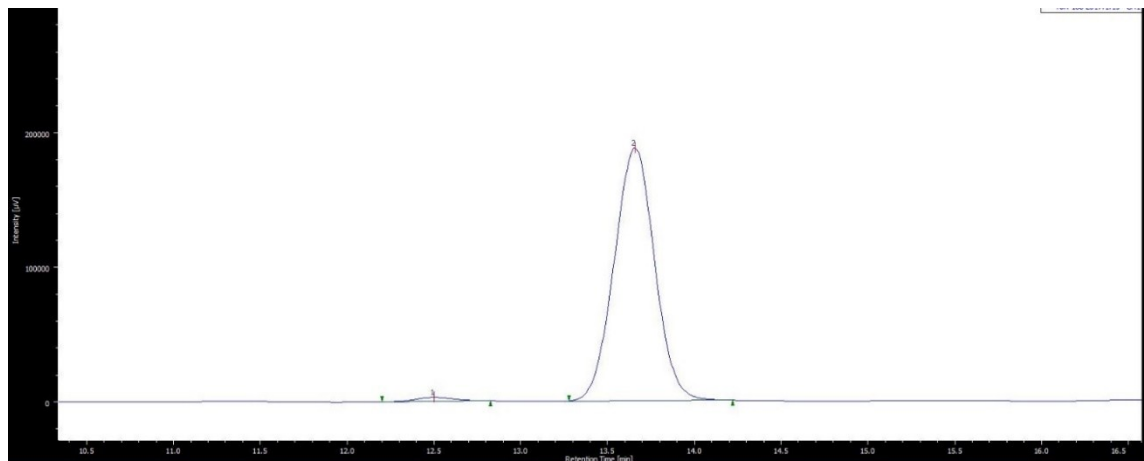

#### racemic-**3aa**

| Peak | tR (min) | Area (%) |
|------|----------|----------|
| 1    | 12.5     | 50.0     |
| 2    | 13.4     | 50.0     |

#### (*R*)-**3aa**

| Peak | tR (min) | Area (%) |
|------|----------|----------|
| 1    | 12.3     | 1.2      |
| 2    | 13.5     | 98.8     |

**(3*R*)-2-[(1,3-dithiolane)-2-yl]-3-(4-fluorophenyl)-4-nitrobutanenitrile (3ba)**

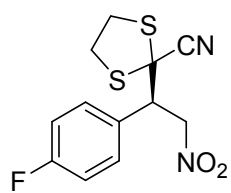

**3ba**

racemic-**3ba**

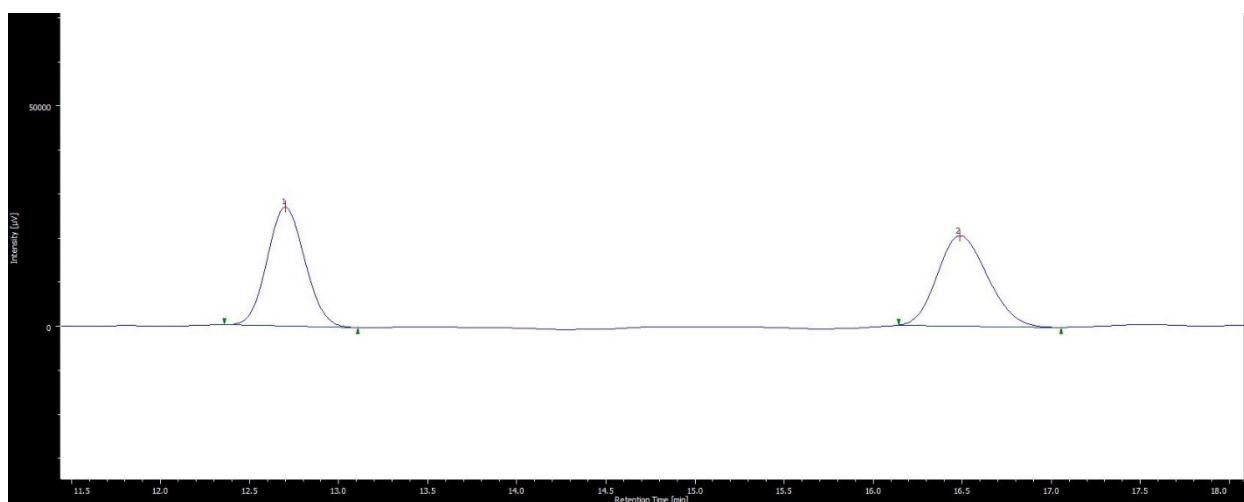

**(*R*)-3ba**

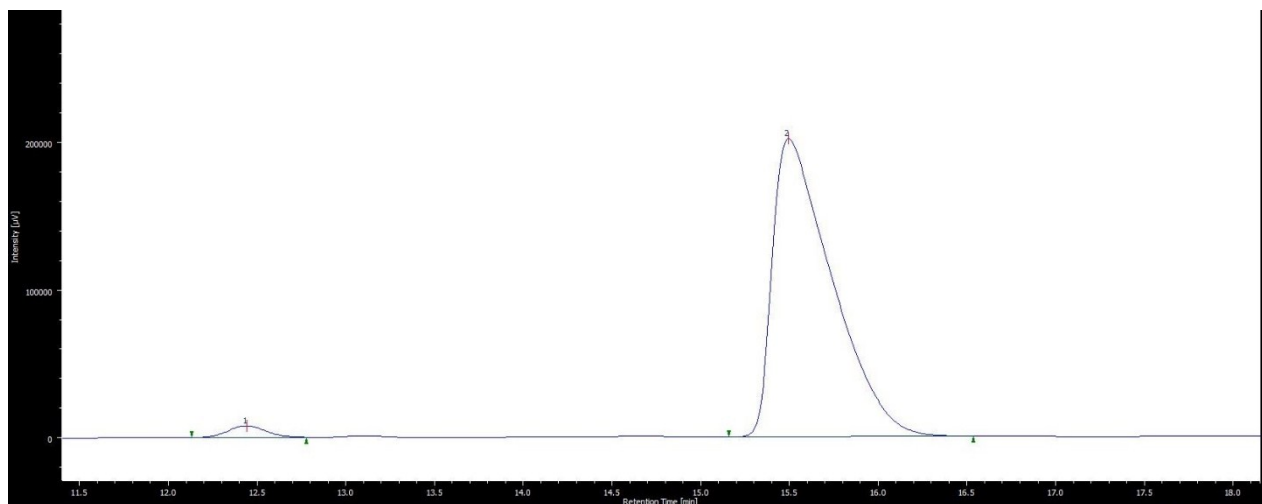

racemic-**3ba**

| Peak | tR (min) | Area (%) |
|------|----------|----------|
| 1    | 12.7     | 49.8     |
| 2    | 16.5     | 50.3     |

**(*R*)-3ba**

| Peak | tR (min) | Area (%) |
|------|----------|----------|
| 1    | 12.4     | 2.4      |
| 2    | 15.5     | 97.6     |

**(3*R*)-2-[(1,3-Dithiolane)-2-yl]-3-(3-fluorophenyl)-4-nitrobutanenitrile (3ca)**

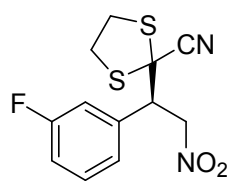

**3ca**

racemic-3ca

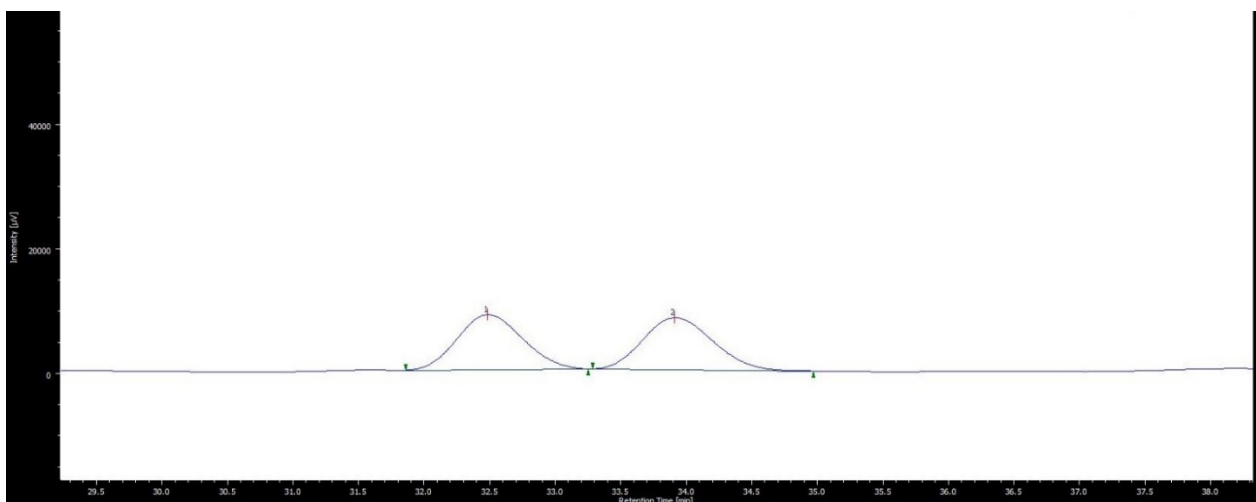

**(*R*)-3ca**

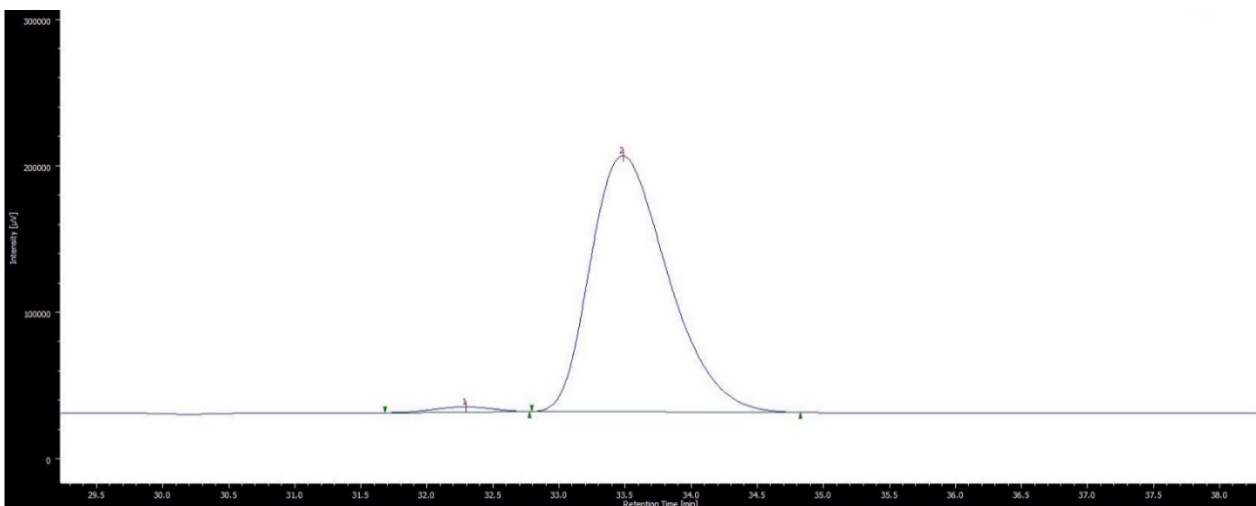

racemic-3ca

| Peak | tR (min) | Area (%) |
|------|----------|----------|
| 1    | 32.5     | 49.7     |
| 2    | 33.9     | 50.3     |

(*R*)-3ca

| Peak | tR (min) | Area (%) |
|------|----------|----------|
| 1    | 32.3     | 1.5      |
| 2    | 33.5     | 98.5     |

**(3*R*)-2-[(1,3-Dithiolane)-2-yl]-3-(4-chlorophenyl)-4-nitrobutanenitrile (3da)**

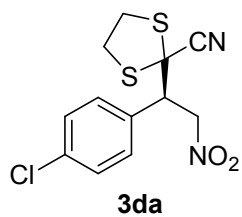

racemic-**3da**

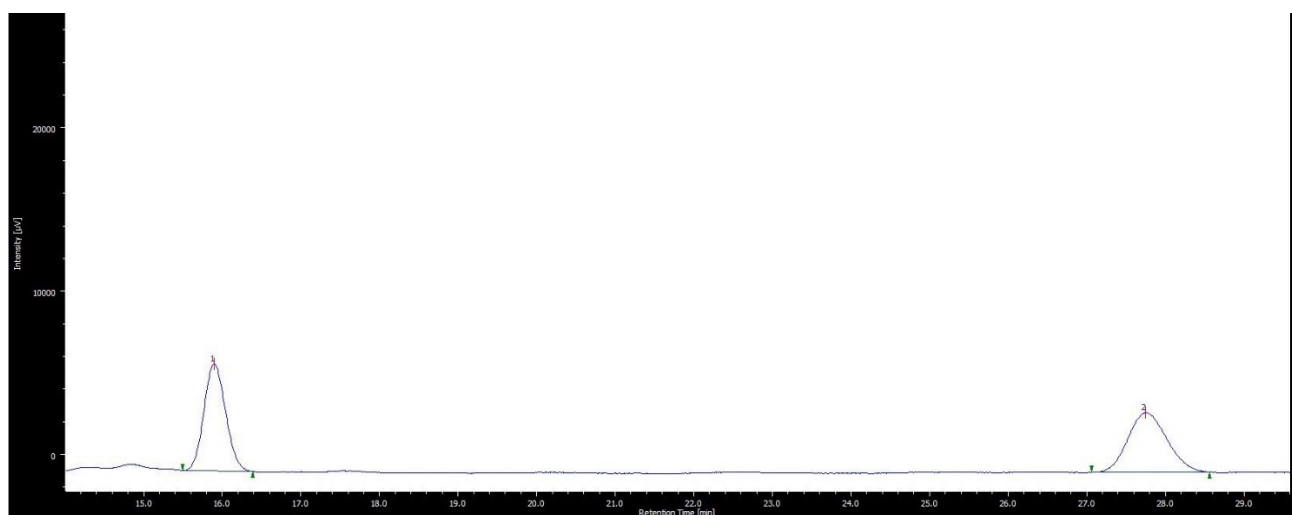

**(*R*)-3da**

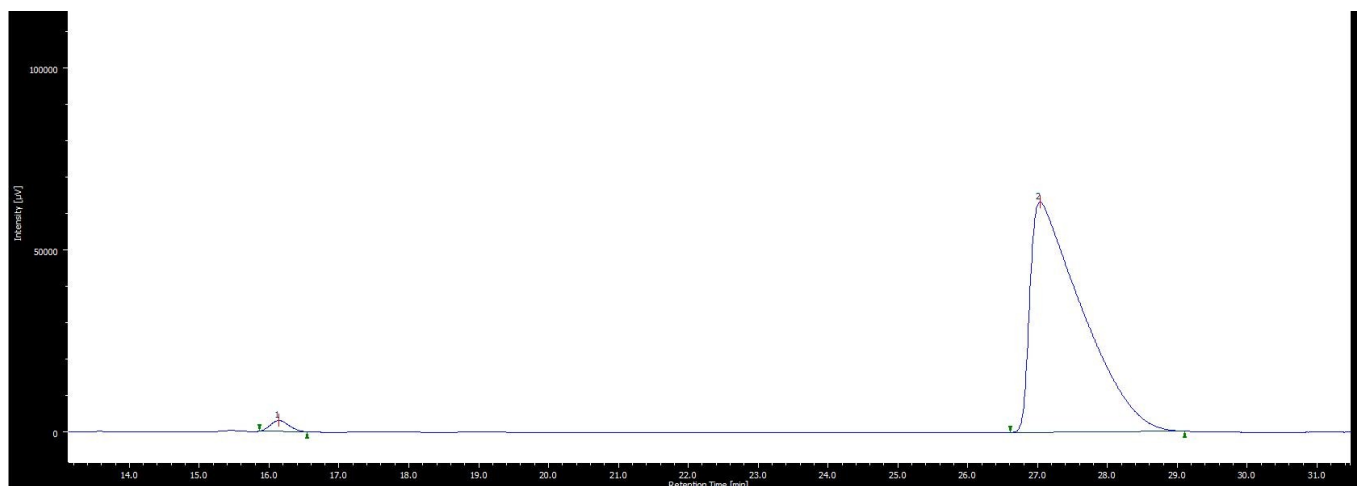

racemic-**3da**

| Peak | tR (min) | Area (%) |
|------|----------|----------|
| 1    | 15.9     | 50.0     |
| 2    | 27.7     | 50.0     |

**(*R*)-3da**

| Peak | tR (min) | Area (%) |
|------|----------|----------|
| 1    | 16.1     | 1.7      |
| 2    | 27.0     | 98.3     |

**(3*R*)-2-[(1,3-Dithiolane)-2-yl]-3-(3-chlorophenyl)-4-nitrobutanenitrile (3ea)**

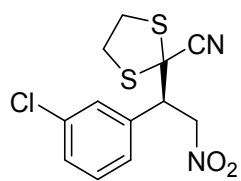

**3ea**

racemic-3ea

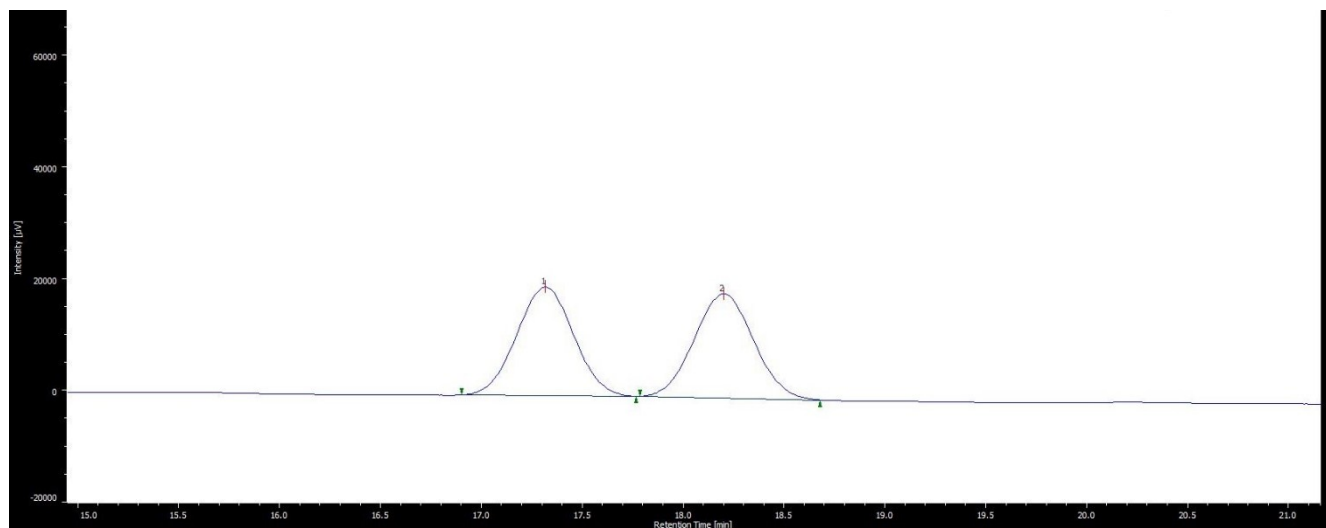

(*R*)-3ea

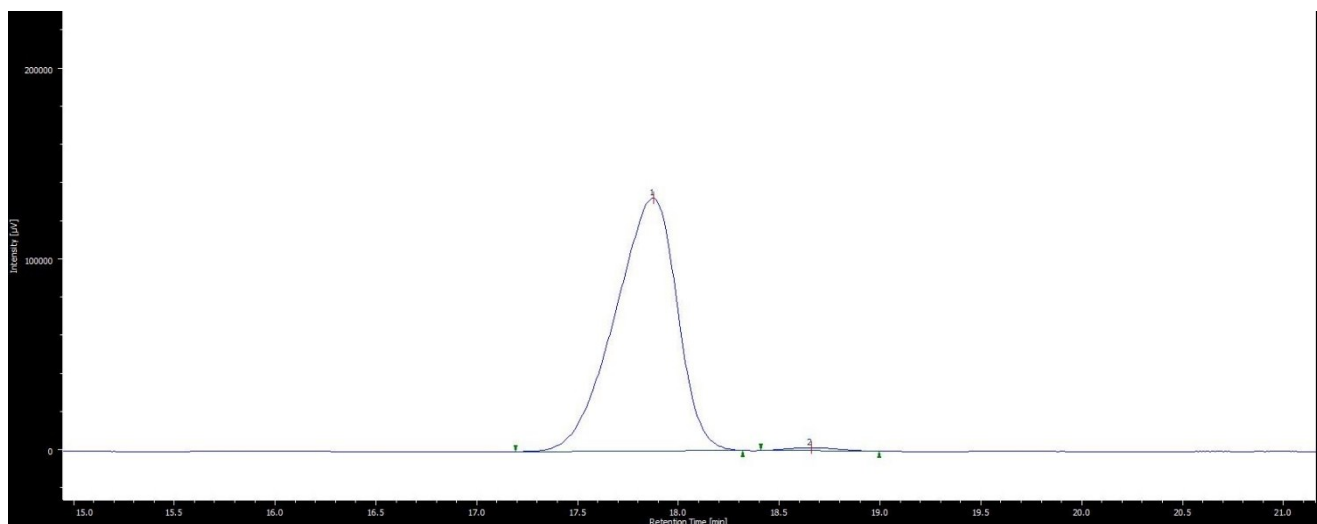

racemic-3ea

| Peak | tR (min) | Area (%) |
|------|----------|----------|
| 1    | 17.3     | 50.0     |
| 2    | 18.2     | 50.0     |

(*R*)-3ea

| Peak | tR (min) | Area (%) |
|------|----------|----------|
| 1    | 17.9     | 99.0     |
| 2    | 18.7     | 1.0      |

**(3*R*)-2-[(1,3-Dithiolane)-2-yl]-3-(4-bromophenyl)-4-nitrobutanenitrile (3fa)**

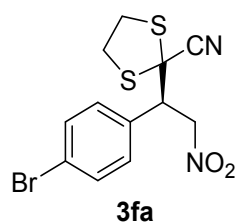

racemic-**3fa**

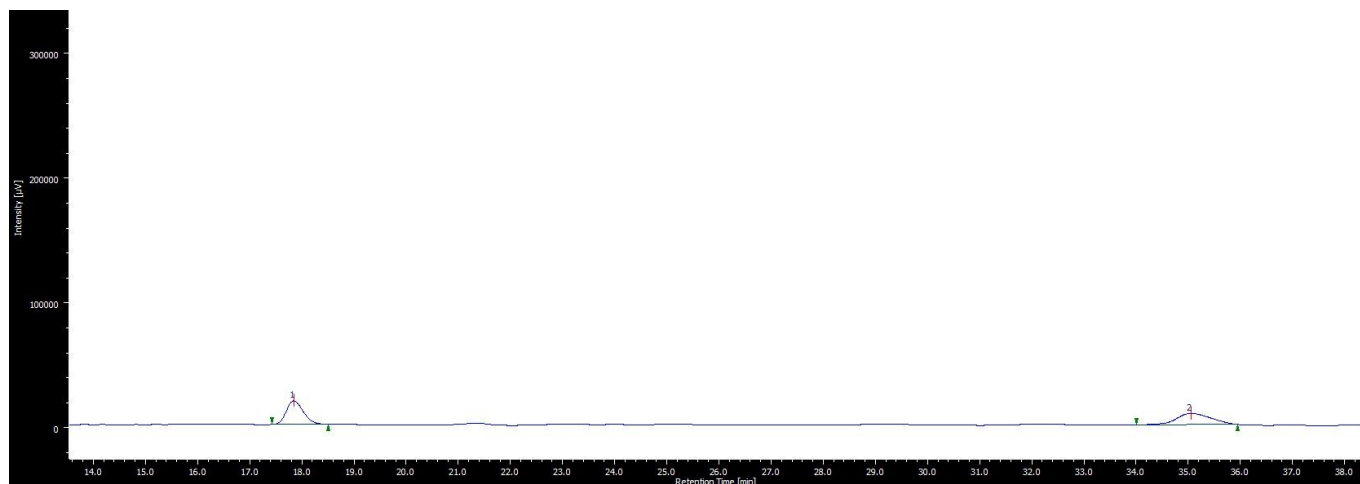

(*R*)-**3fa**

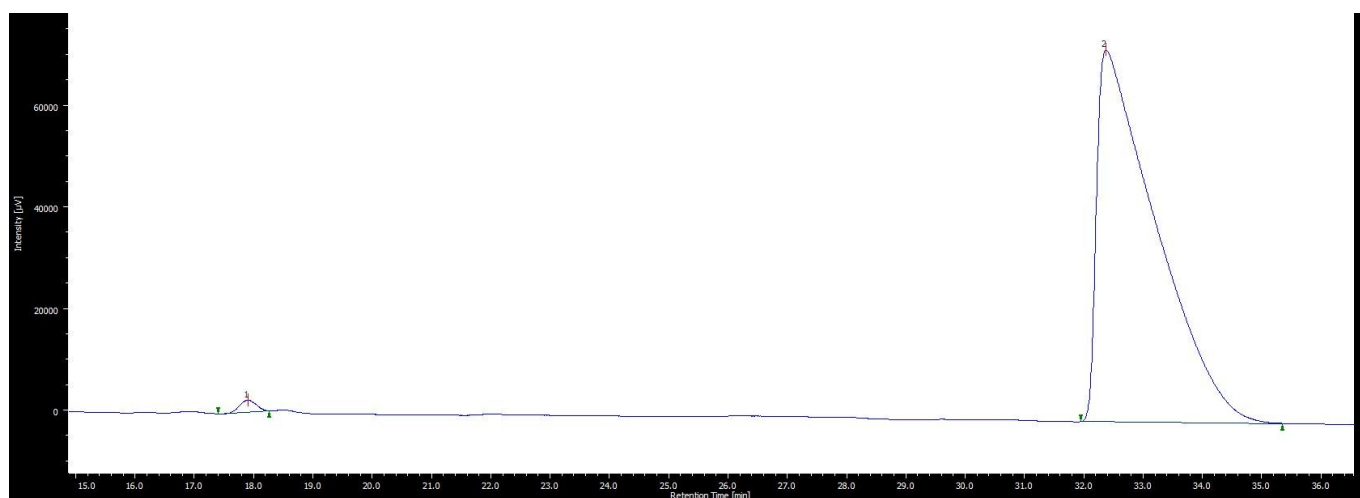

racemic-**3fa**

| Peak | tR (min) | Area (%) |
|------|----------|----------|
| 1    | 17.8     | 50.0     |
| 2    | 35.0     | 50.0     |

(*R*)-**3fa**

| Peak | tR (min) | Area (%) |
|------|----------|----------|
| 1    | 17.9     | 0.9      |
| 2    | 12.3     | 99.1     |



**(3*R*)-2-[(1,3-Dithiolane)-2-yl]-4-nitro-3-(4-trifluoromethyl)phenylbutanenitrile (3ga)**

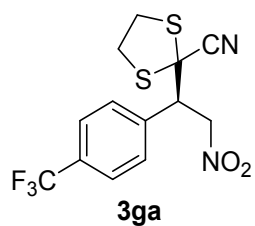

racemic-3ga

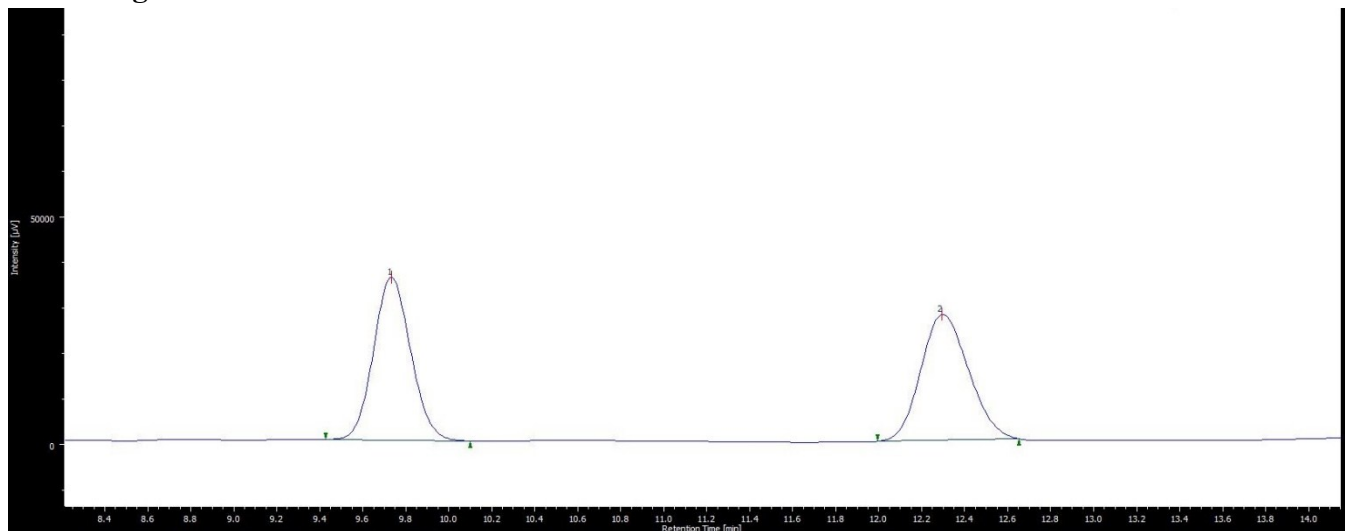

(*R*)-3ga

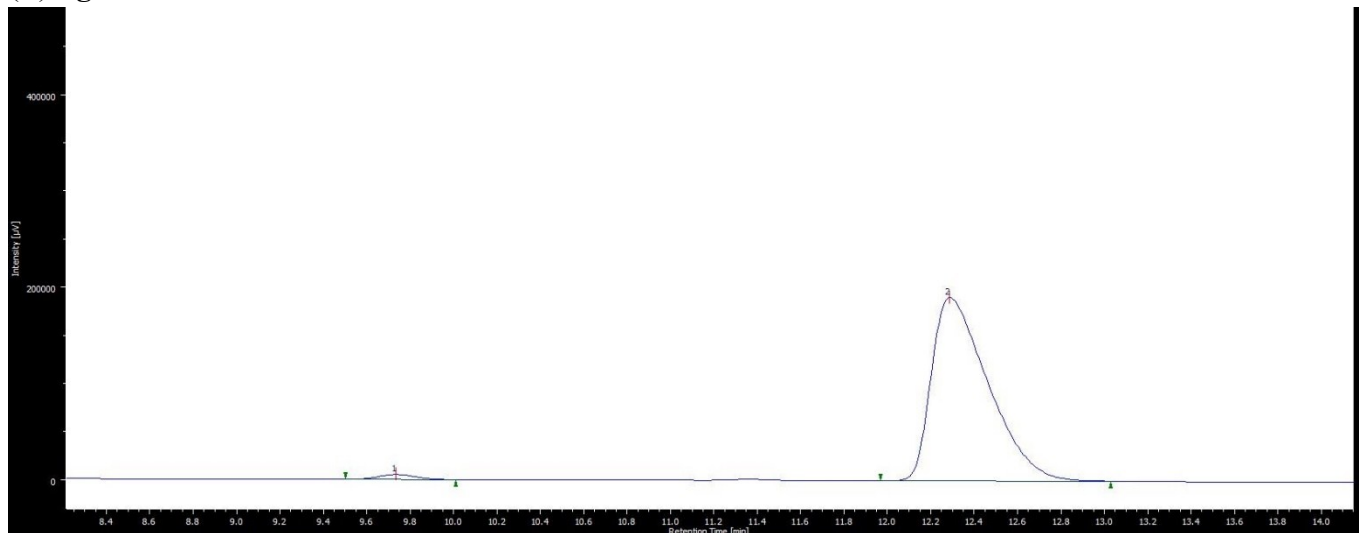

racemic-3ga

| Peak | tR (min) | Area (%) |
|------|----------|----------|
| 1    | 9.7      | 50.2     |
| 2    | 12.3     | 49.8     |

(*R*)-3ga

| Peak | tR (min) | Area (%) |
|------|----------|----------|
| 1    | 9.7      | 1.8      |
| 2    | 12.3     | 98.2     |

**(3*R*)-2-[(1,3-Dithiolane)-2-yl]-3-(4-methylphenyl)-4-nitrobutanenitrile (3ha)**

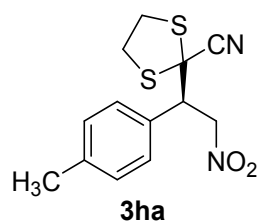

racemic-**3ha**

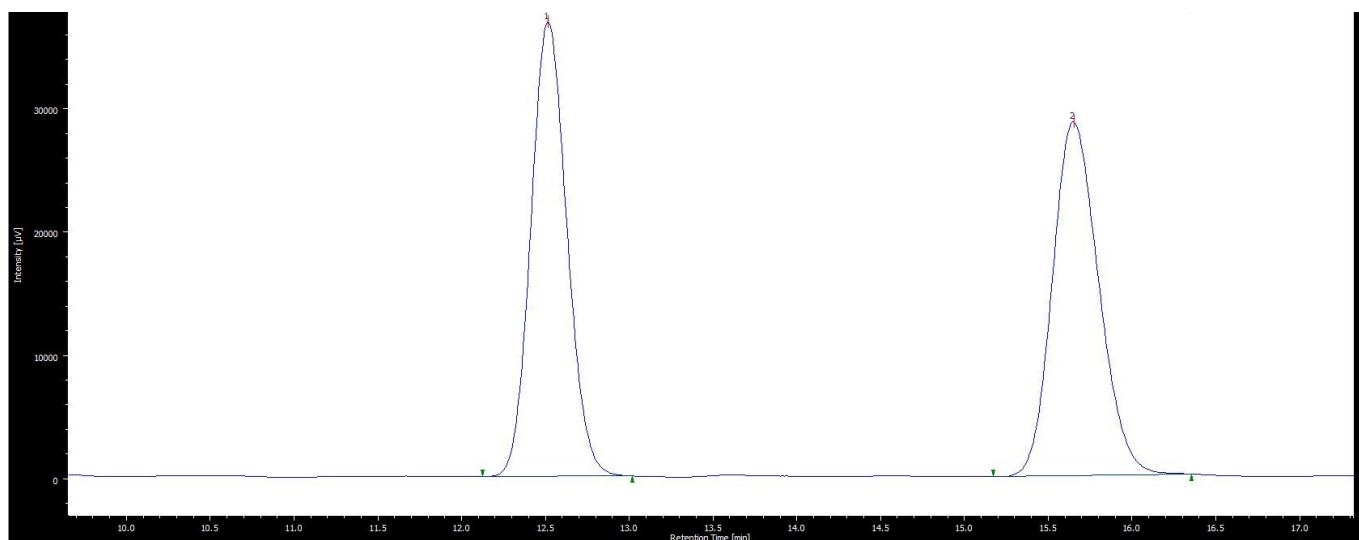

**(*R*)-3ha**

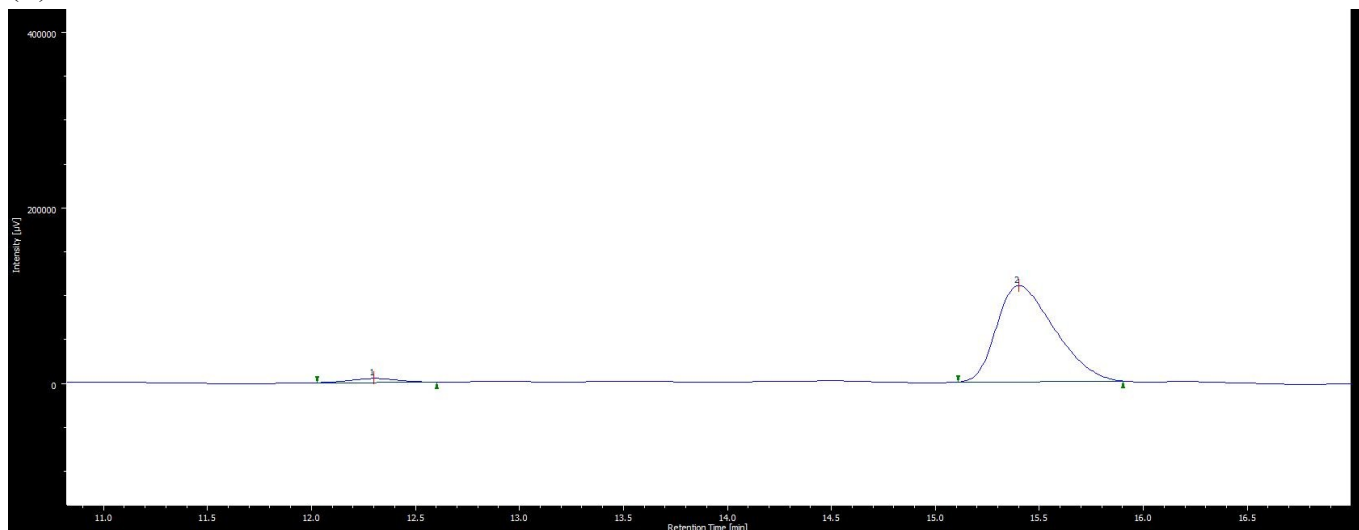

racemic-**3ha**

| Peak | tR (min) | Area (%) |
|------|----------|----------|
| 1    | 12.5     | 50.0     |
| 2    | 15.7     | 50.0     |

**(*R*)-3ha**

| Peak | tR (min) | Area (%) |
|------|----------|----------|
| 1    | 12.3     | 2.8      |
| 2    | 15.4     | 97.2     |

**(3*R*)-2-[(1,3-Dithiolane)-2-yl]-3-(4-methoxyphenyl)-4-nitrobutanenitrile (3ia)**

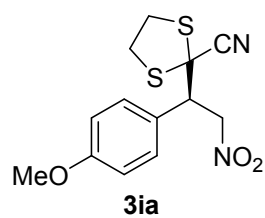

racemic-**3ia**

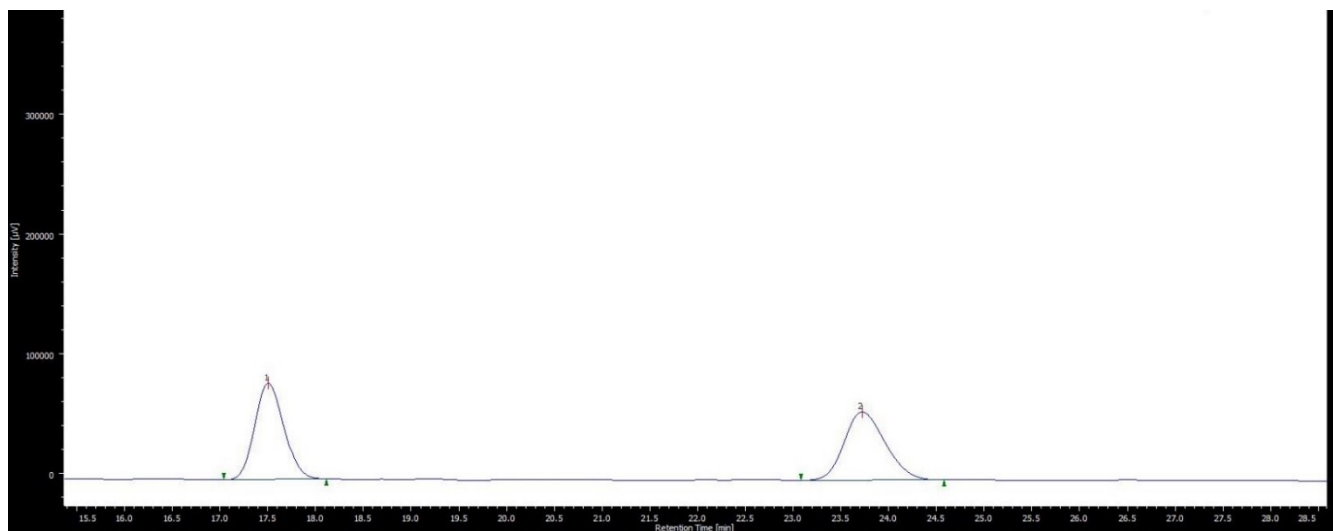

**(*R*)-3ia**

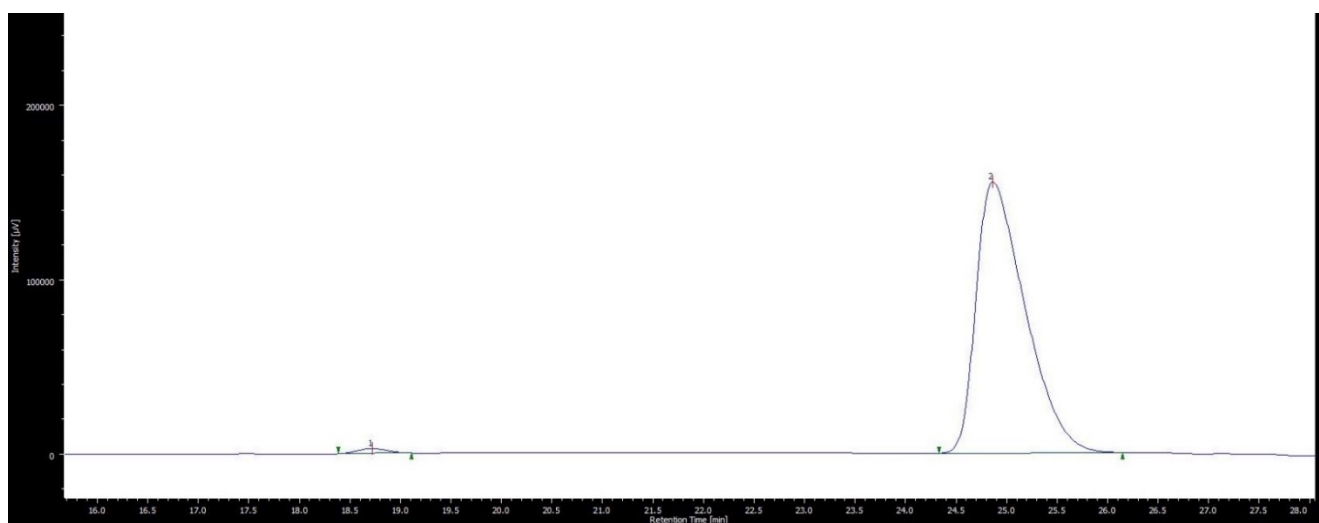

| racemic- <b>3ia</b> |          |          | <b>(<i>R</i>)-3ia</b> |          |          |
|---------------------|----------|----------|-----------------------|----------|----------|
| Peak                | tR (min) | Area (%) | Peak                  | tR (min) | Area (%) |
| 1                   | 17.5     | 49.9     | 1                     | 18.7     | 1.1      |
| 2                   | 23.7     | 50.1     | 2                     | 24.8     | 98.9     |

**(3*R*)-2-[(1,3-Dithiolane)-2-yl]-3-(2-naphthyl)-4-nitrobutanenitrile (3ja)**

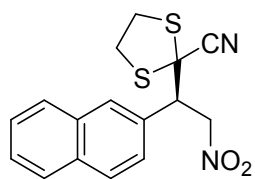

**3ja**

racemic-3ja

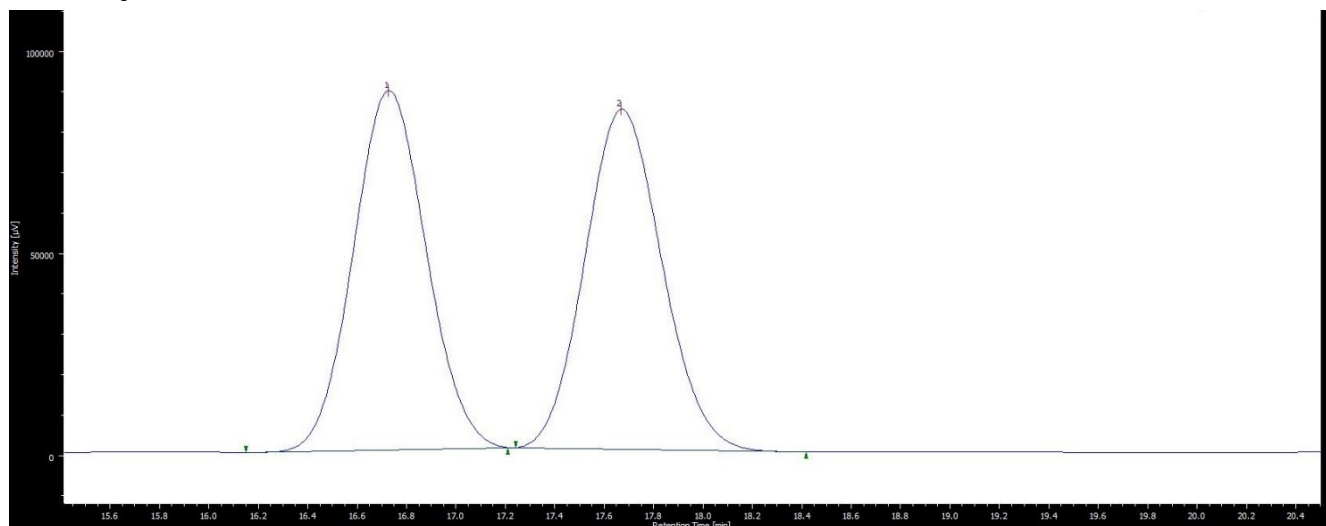

**(*R*)-3ja**

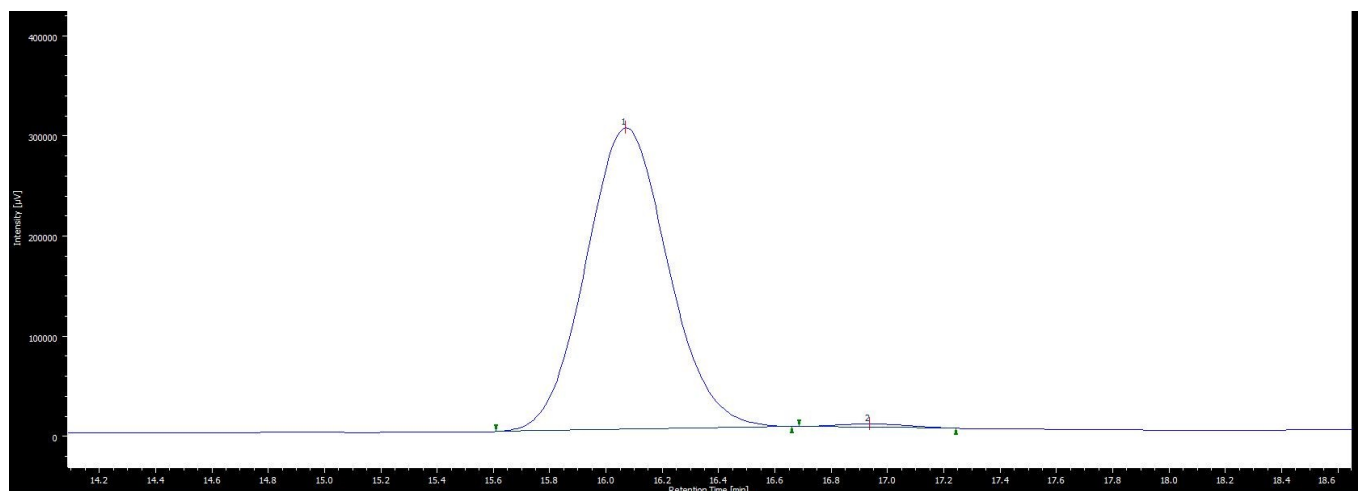

racemic-3ja

| Peak | tR (min) | Area (%) |
|------|----------|----------|
| 1    | 16.7     | 49.9     |
| 2    | 17.7     | 50.1     |

(*R*)-3ja

| Peak | tR (min) | Area (%) |
|------|----------|----------|
| 1    | 16.1     | 99.0     |
| 2    | 16.9     | 1.0      |

**(3*R*)-2-[(1,3-Dithiolane)-2-yl]-3-(2-furyl)-4-nitrobutanenitrile (3ka)**

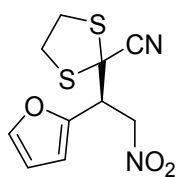

**3ka**

racemic-3ka

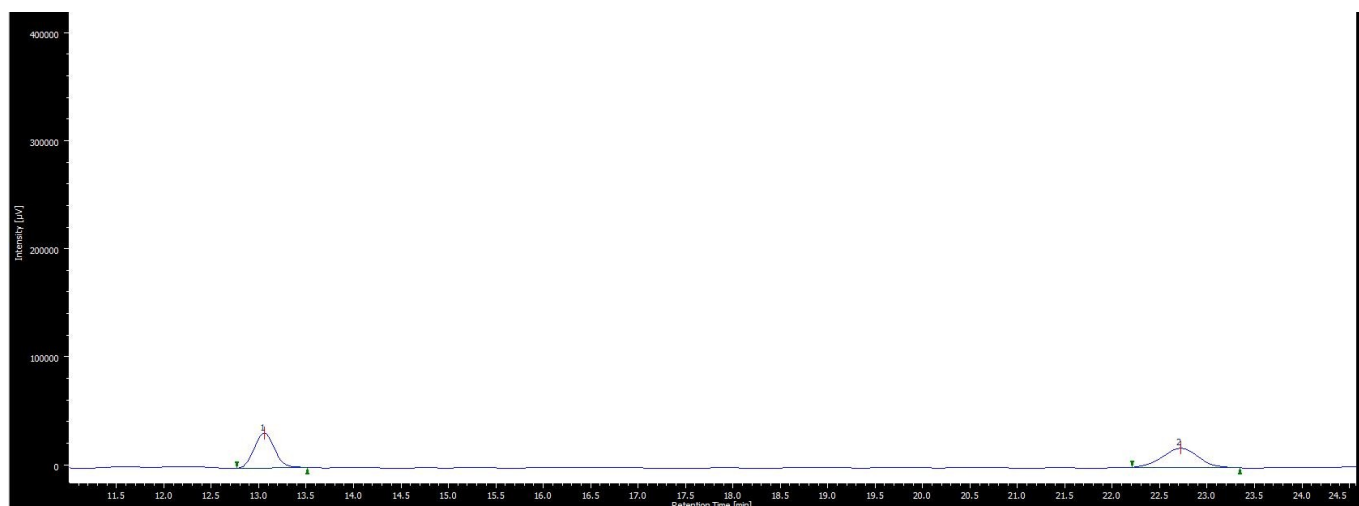

**(*R*)-3ka**

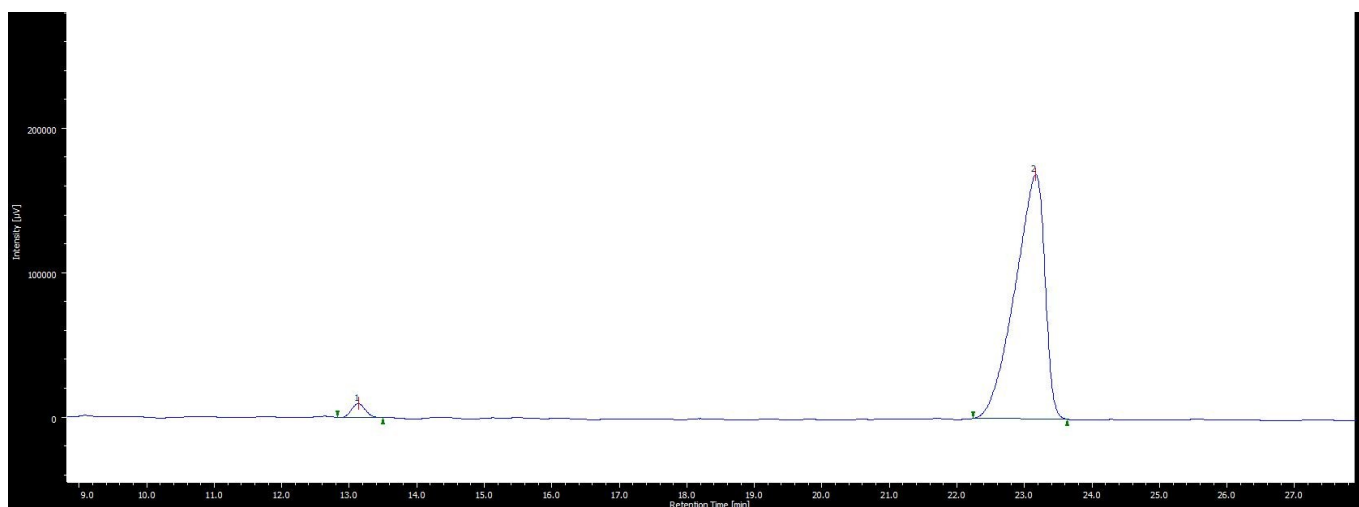

racemic-3ka

| Peak | tR (min) | Area (%) |
|------|----------|----------|
| 1    | 13.1     | 50.2     |
| 2    | 22.7     | 49.8     |

(*R*)-3ka

| Peak | tR (min) | Area (%) |
|------|----------|----------|
| 1    | 13.1     | 2.5      |
| 2    | 23.2     | 97.5     |

**(3*R*)-2-[(1,3-Dithiolane)-2-yl]-3-(3-furyl)-4-nitrobutanenitrile (3la)**

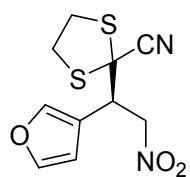

**3la**

racemic-3la

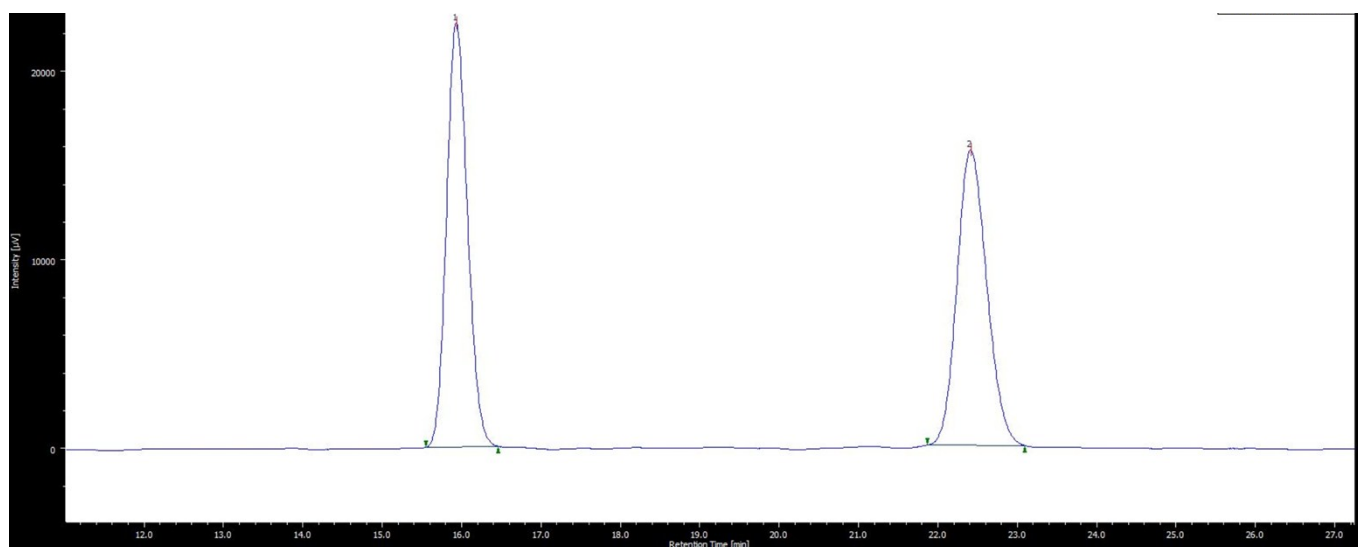

(*R*)-3la

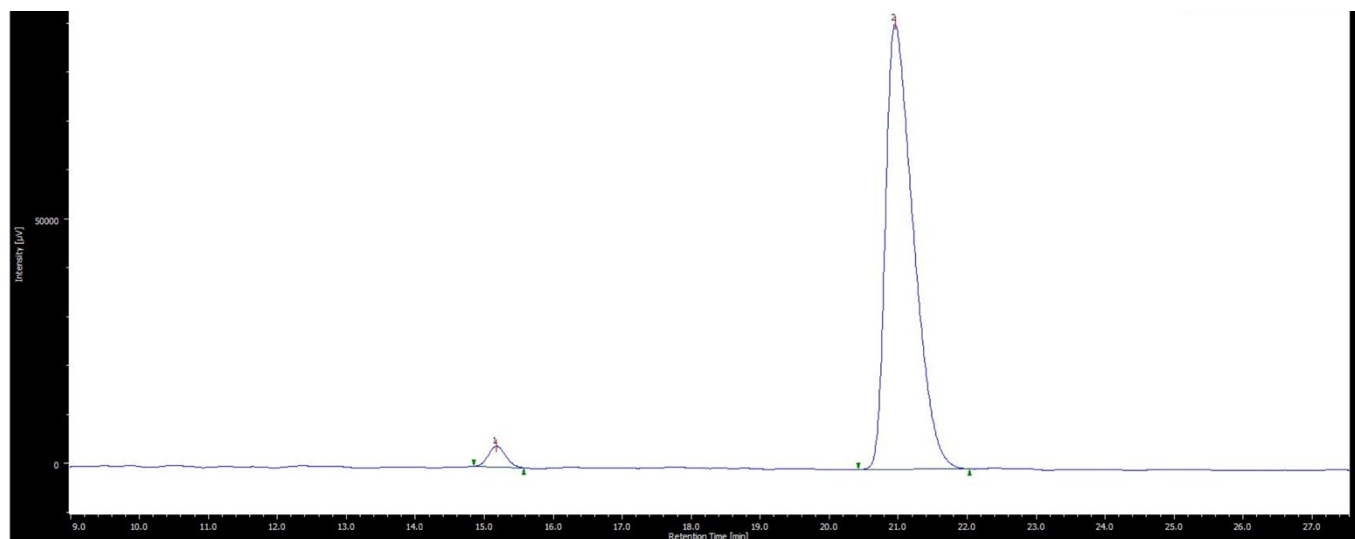

racemic-3la

| Peak | tR (min) | Area (%) |
|------|----------|----------|
| 1    | 15.9     | 50.1     |
| 2    | 22.4     | 49.9     |

(*R*)-3la

| Peak | tR (min) | Area (%) |
|------|----------|----------|
| 1    | 15.2     | 2.8      |
| 2    | 21.0     | 97.2     |

**(3*R*)-2-[(1,3-Dithiolane)-2-yl]-4-nitro-3-(2-thienyl)butanenitrile (3ma)**

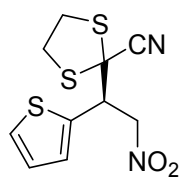

**3ma**

racemic-**3ma**

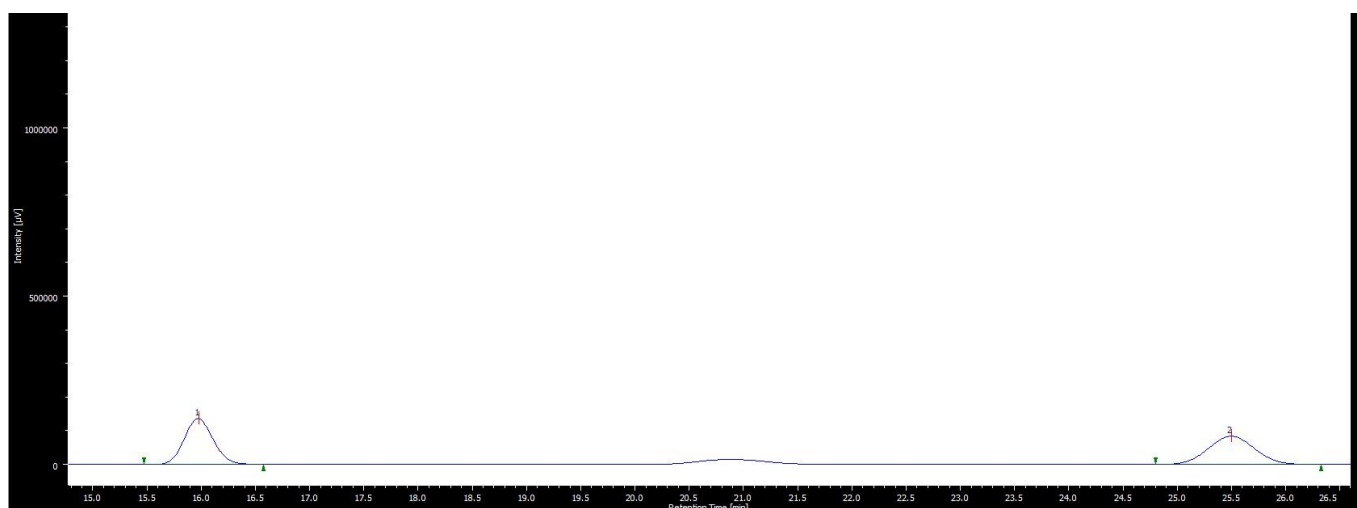

**(*R*)-3ma**

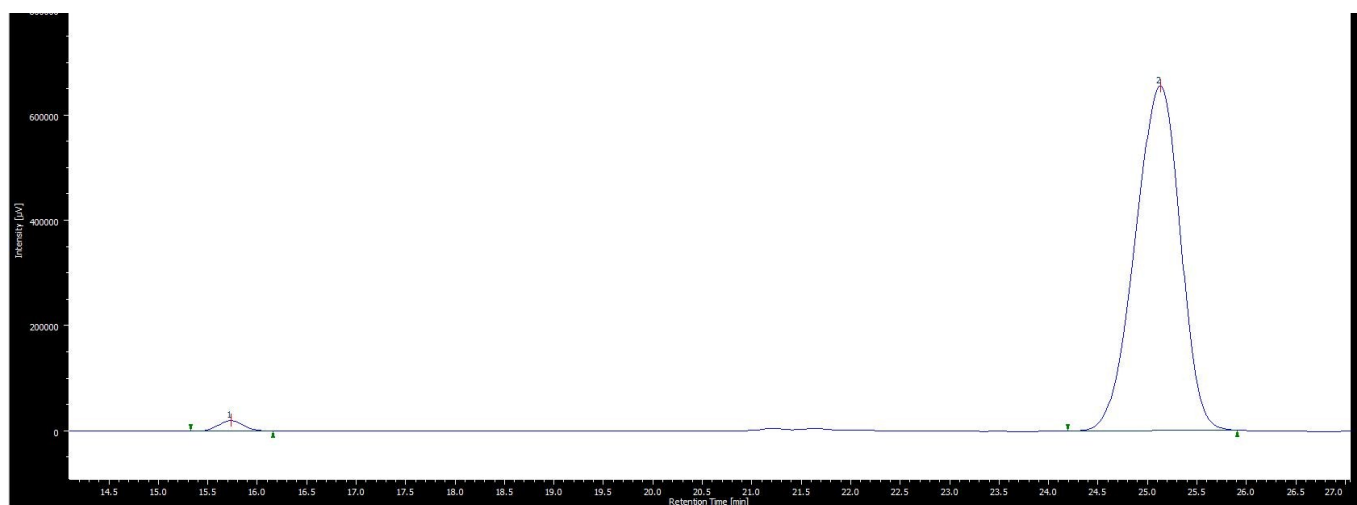

racemic-**3ma**

| Peak | tR (min) | Area (%) |
|------|----------|----------|
| 1    | 16.0     | 50.2     |
| 2    | 25.5     | 49.8     |

**(*R*)-3ma**

| Peak | tR (min) | Area (%) |
|------|----------|----------|
| 1    | 15.7     | 1.7      |
| 2    | 25.1     | 98.3     |

**(3*R*)-3-(Nitromethyl)-2-[(1,3-dithiolane)-2-yl]-hexanenitrile (3na)**

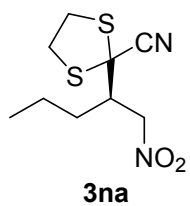

racemic-**3na**

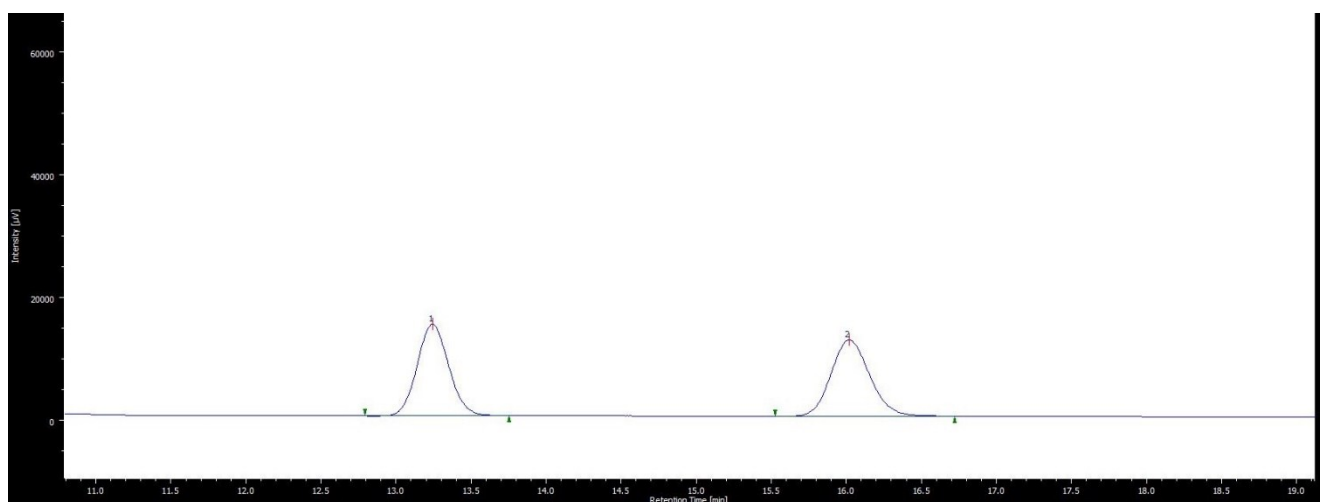

**(*R*)-3na**

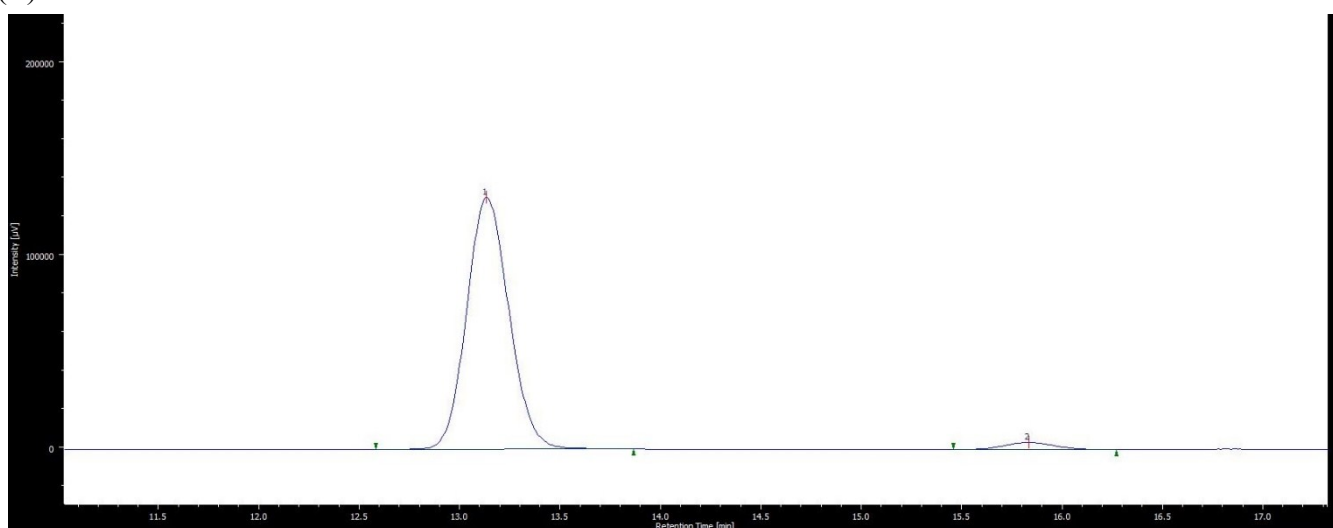

| racemic- <b>3na</b> |          |          | <b>(<i>R</i>)-3na</b> |          |          |
|---------------------|----------|----------|-----------------------|----------|----------|
| Peak                | tR (min) | Area (%) | Peak                  | tR (min) | Area (%) |
| 1                   | 13.2     | 49.5     | 1                     | 13.1     | 96.8     |
| 2                   | 16.0     | 50.5     | 2                     | 15.8     | 3.2      |



**(3*R*)-3-(Nitromethyl)-5-methyl-2-[(1,3-dithiolane)-2-yl]-hexanenitrile (3oa)**

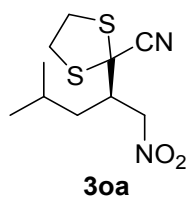

racemic-**3oa**

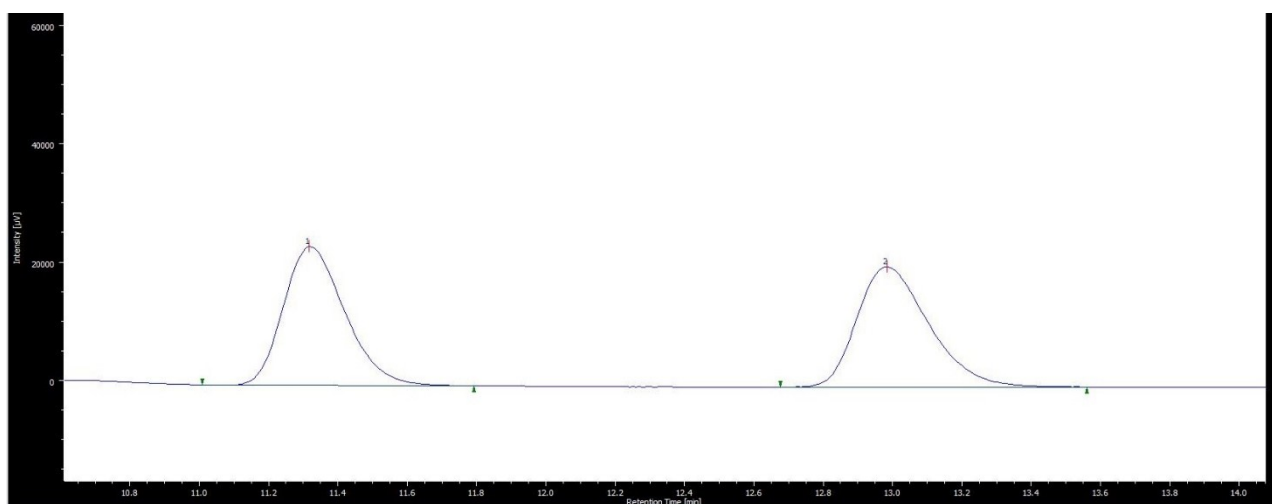

(*R*)-**3oa**

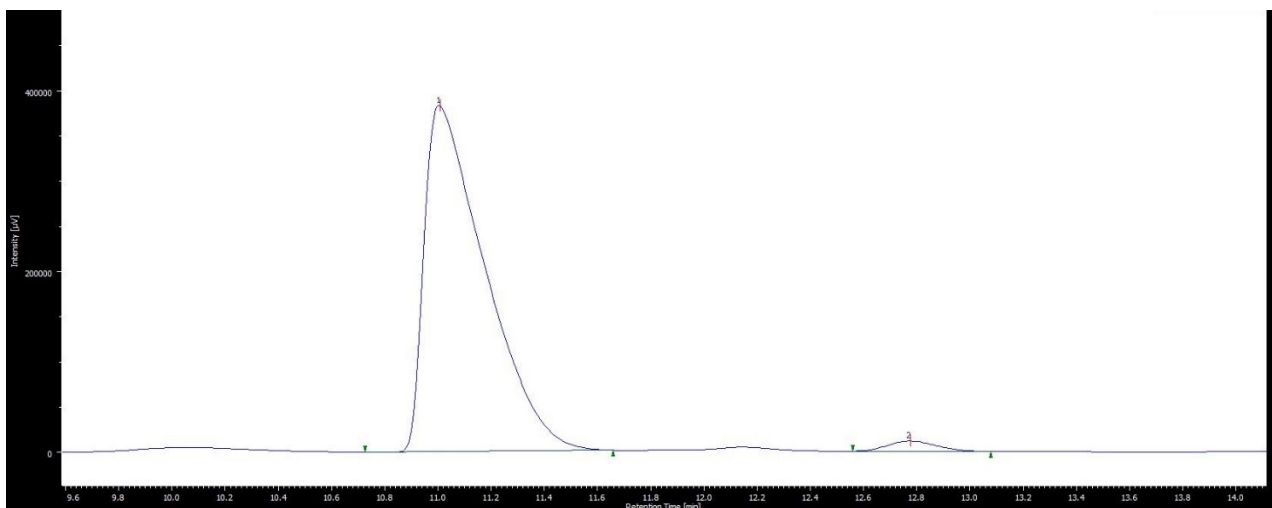

racemic-**3oa**

| Peak | tR (min) | Area (%) |
|------|----------|----------|
| 1    | 11.3     | 49.7     |
| 2    | 13.0     | 50.3     |

(*R*)-**3oa**

| Peak | tR (min) | Area (%) |
|------|----------|----------|
| 1    | 11.0     | 97.7     |
| 2    | 12.8     | 2.3      |

**(3*R*)-2-[(1,3-Dithiolane)-2-yl]-4-nitro-3-phenylbutanamide (5)**

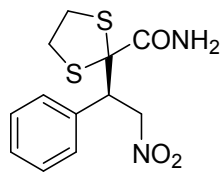

**5**

racemic-5

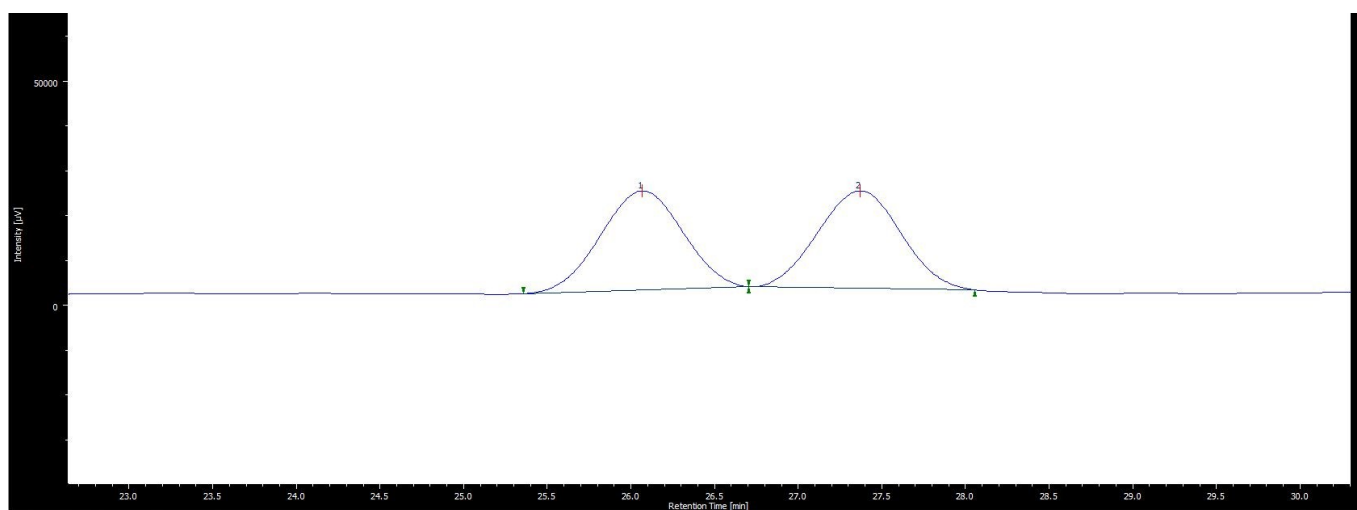

**(*R*)-5**

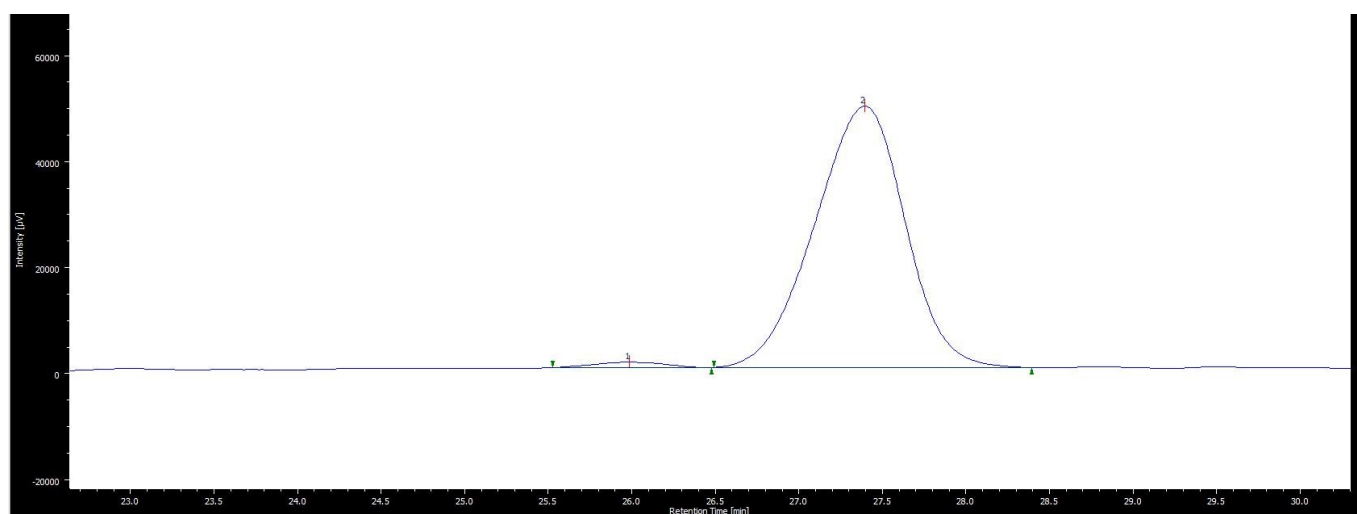

racemic-5

| Peak | tR (min) | Area (%) |
|------|----------|----------|
| 1    | 26.1     | 50.2     |
| 2    | 27.4     | 49.8     |

(*R*)-5

| Peak | tR (min) | Area (%) |
|------|----------|----------|
| 1    | 26.0     | 1.6      |
| 2    | 27.4     | 98.4     |

**(9*R*)-1,4-Dithia-9-phenyl-7-azaspiro[4.4]nonane (6)**

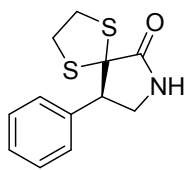

**6**

racemic-6

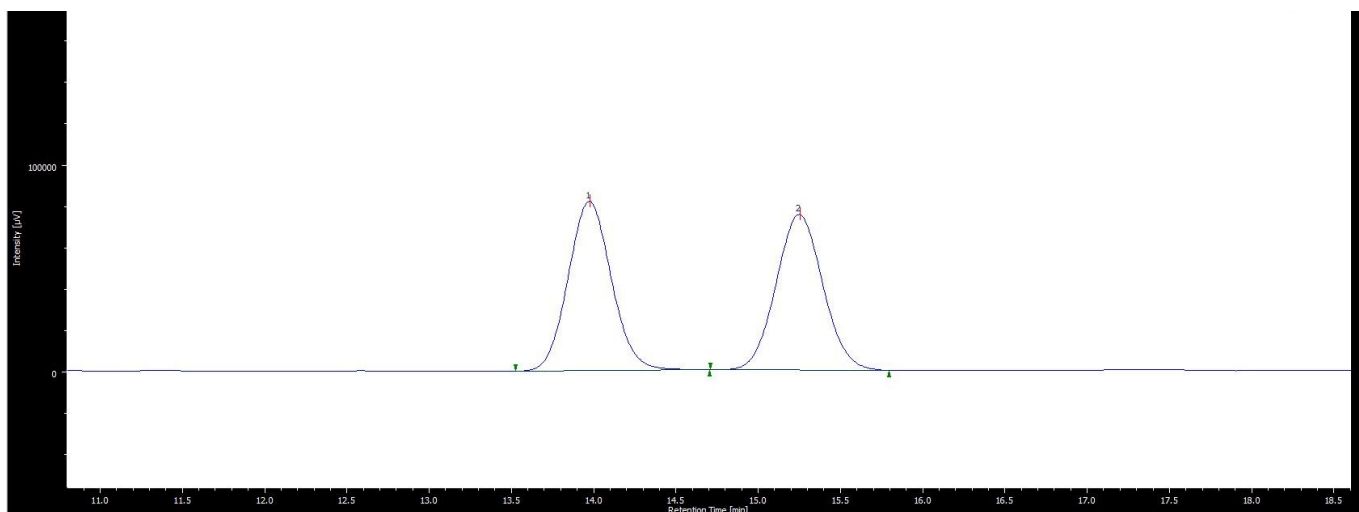

**(*R*)-6**

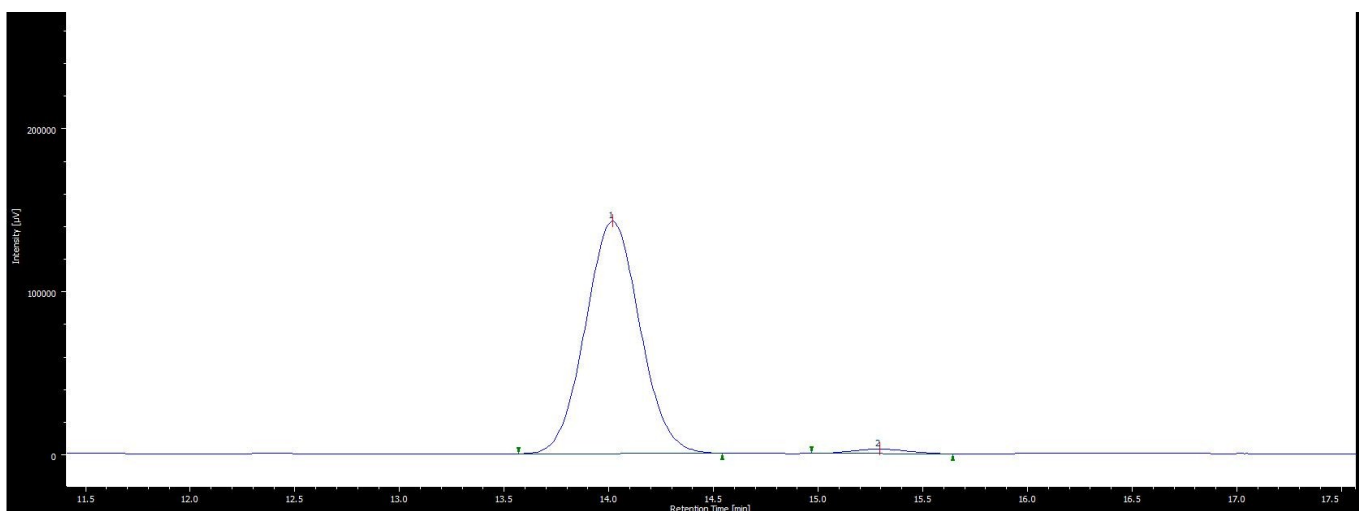

racemic-6

| Peak | tR (min) | Area (%) |
|------|----------|----------|
| 1    | 14.0     | 50.1     |
| 2    | 15.3     | 49.9     |

(*R*)-6

| Peak | tR (min) | Area (%) |
|------|----------|----------|
| 1    | 14.0     | 98.1     |
| 2    | 15.3     | 1.9      |

**(4*R*)-4-Phenyl-2-pyrrolidinone (7)**

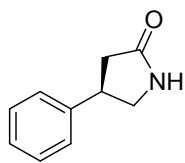

**7**

racemic-7

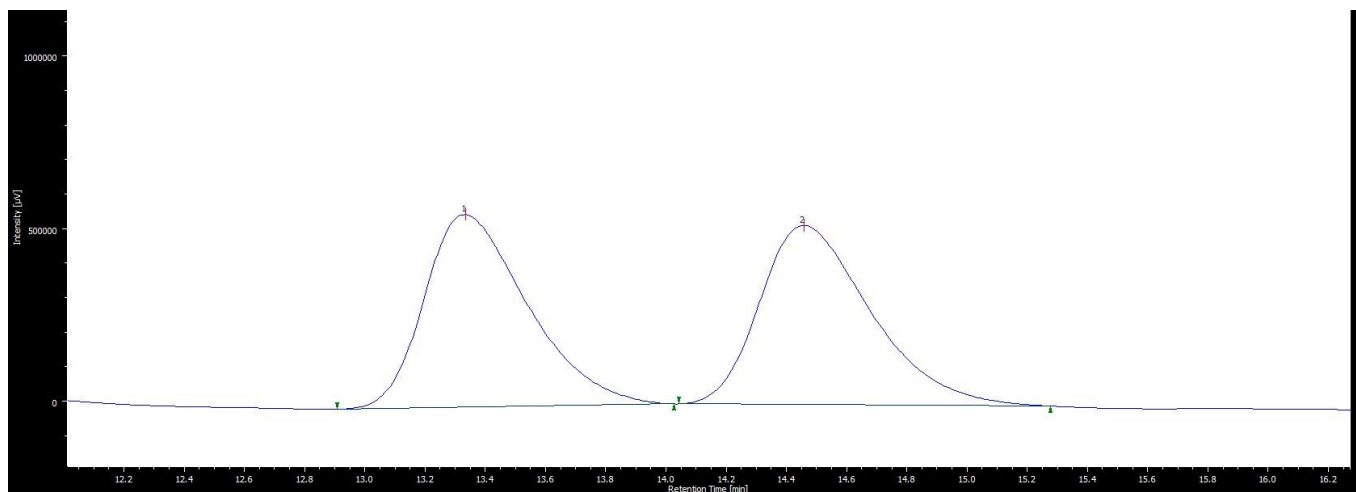

**(*R*)-7**

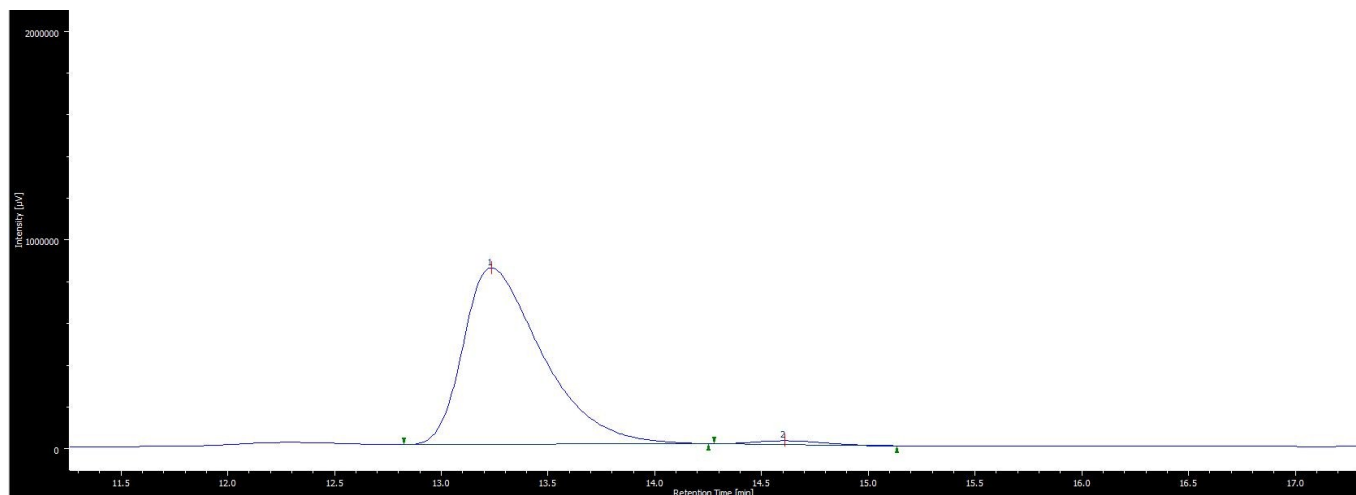

racemic-7

| Peak | tR (min) | Area (%) |
|------|----------|----------|
| 1    | 13.3     | 50.0     |
| 2    | 14.5     | 50.0     |

(*R*)-7

| Peak | tR (min) | Area (%) |
|------|----------|----------|
| 1    | 13.2     | 98.3     |
| 2    | 14.6     | 1.7      |

**(3*R*)-2-[(1,3-Dithiolane)-2-yl]-4-nitro-3-[3-(cyclopentyloxy)-4-methoxyphenyl]butanenitrile (8)**

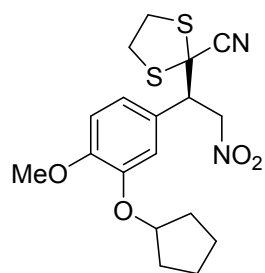

**8**

racemic-8

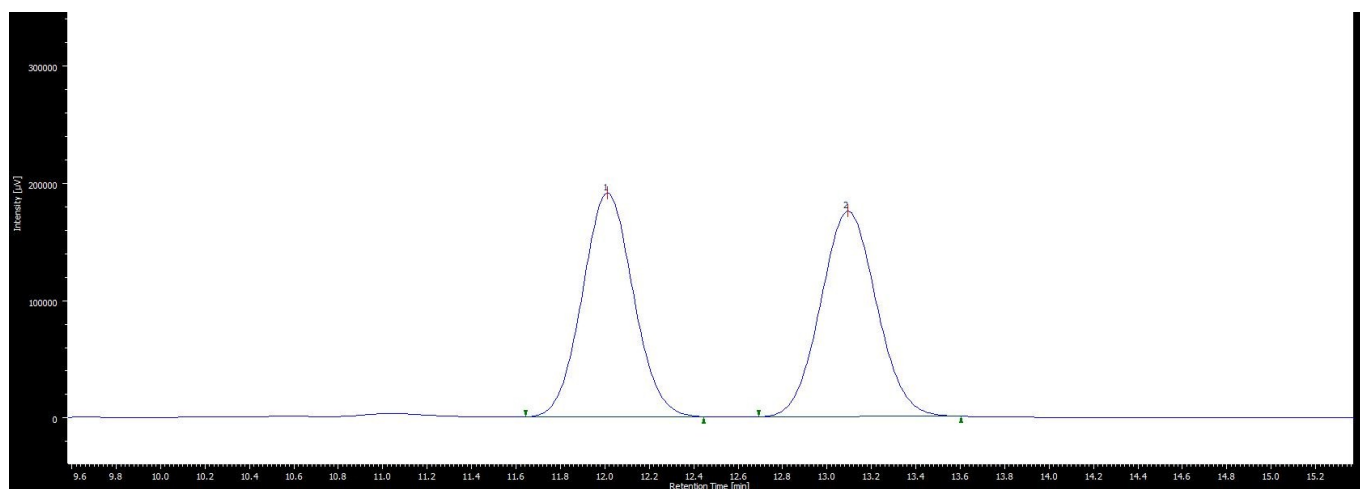

**(*R*)-8**

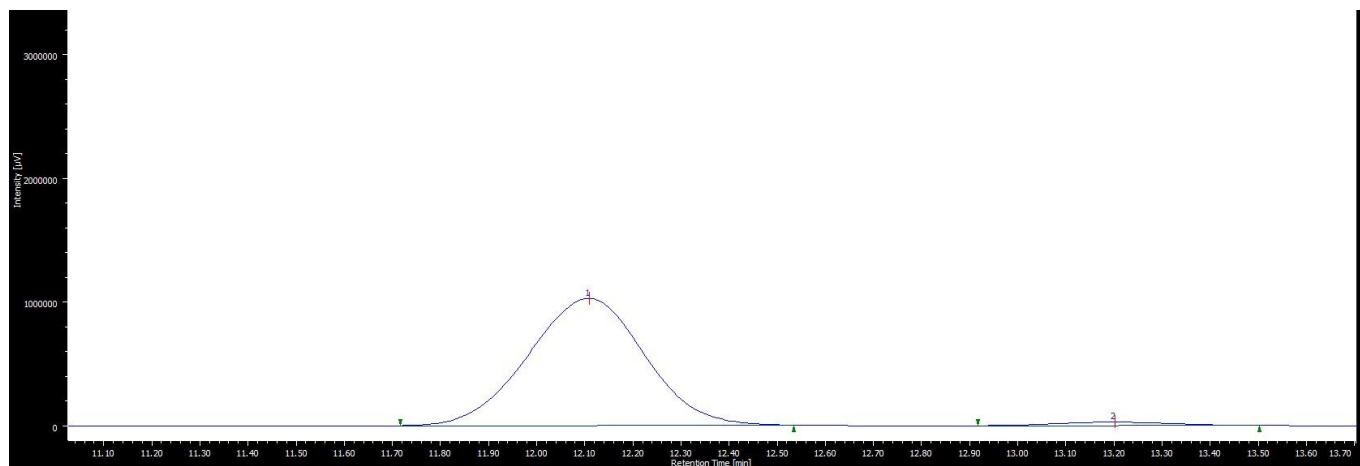

racemic-8

| Peak | tR (min) | Area (%) |
|------|----------|----------|
| 1    | 12.0     | 49.9     |
| 2    | 13.1     | 50.1     |

(*R*)-8

| Peak | tR (min) | Area (%) |
|------|----------|----------|
| 1    | 12.0     | 97.3     |
| 2    | 13.1     | 2.7      |

**(3*R*)-2-[(1,3-Dithiolane)-2-yl]-4-nitro-3-[3-(cyclopentyloxy)-4-methoxyphenyl]butanamide (9)**

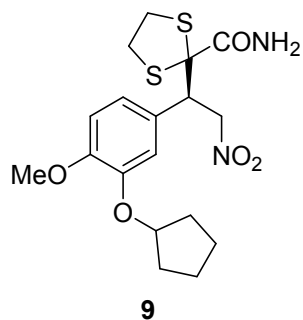

racemic-9

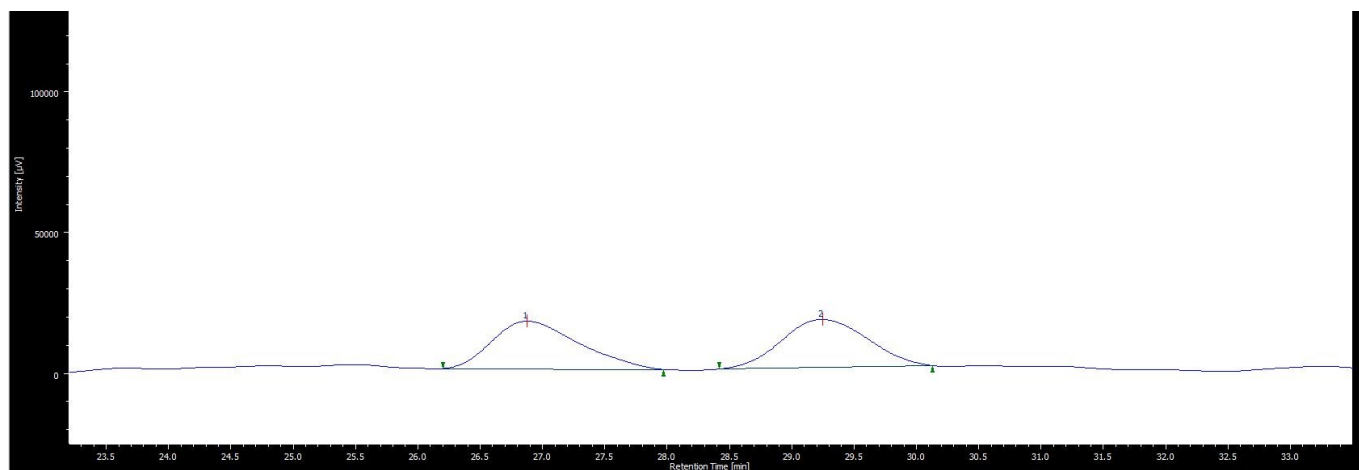

(*R*)-9

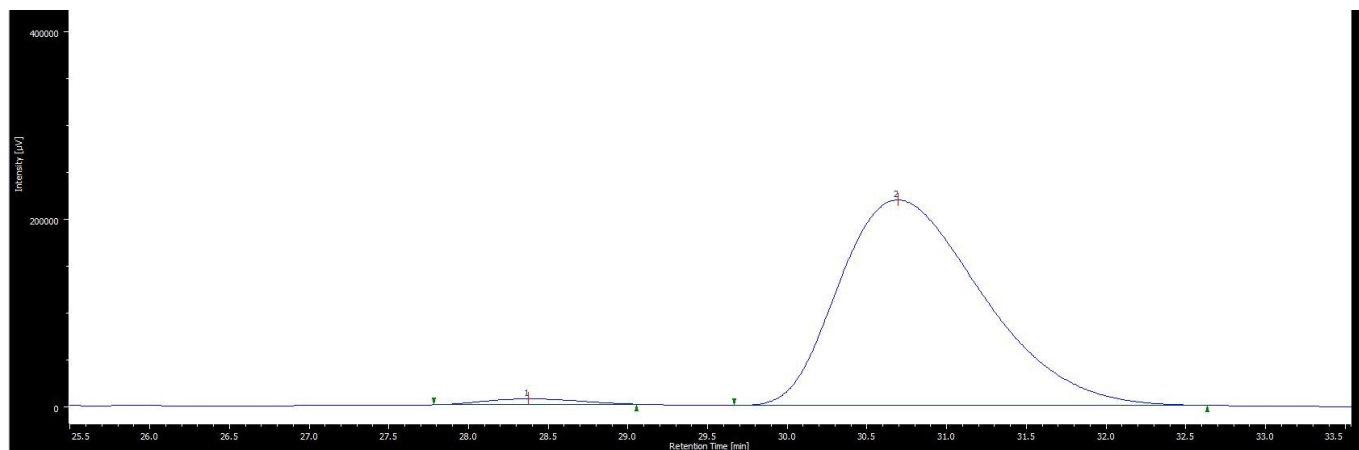

| racemic-9 |          |          | ( <i>R</i> )-9 |          |          |
|-----------|----------|----------|----------------|----------|----------|
| Peak      | tR (min) | Area (%) | Peak           | tR (min) | Area (%) |
| 1         | 26.9     | 50.1     | 1              | 28.4     | 1.7      |
| 2         | 29.2     | 49.9     | 2              | 30.7     | 98.3     |

**(9*R*)-1,4-Dithia-9-[3-(cyclopentyloxy)-4-methoxyphenyl]-7-azaspiro[4.4]nonane (10)**

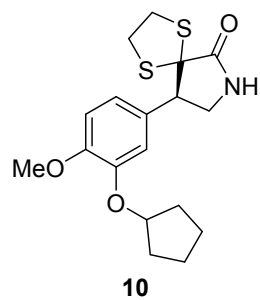

**racemic-10**

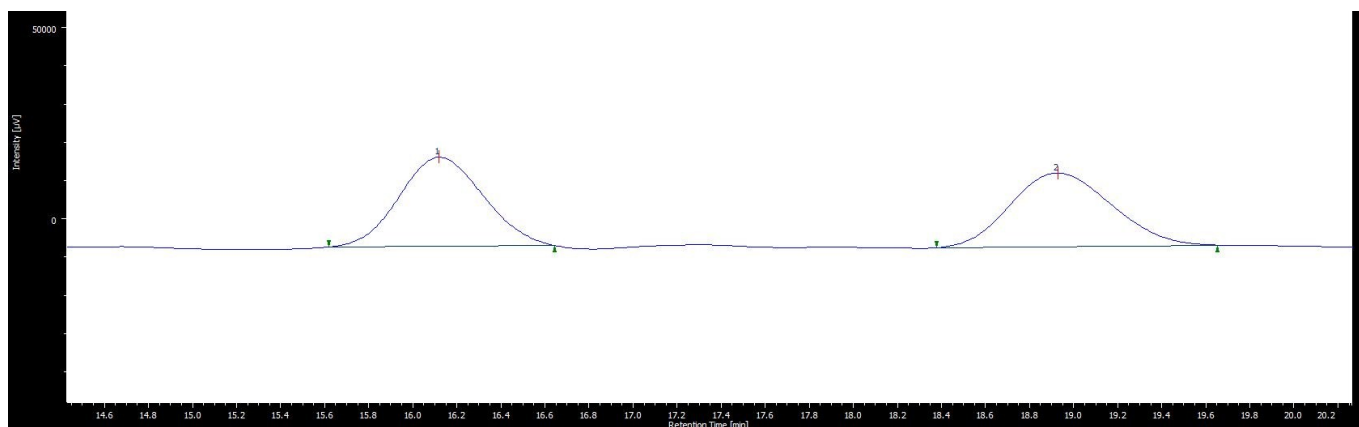

**(*R*)-10**

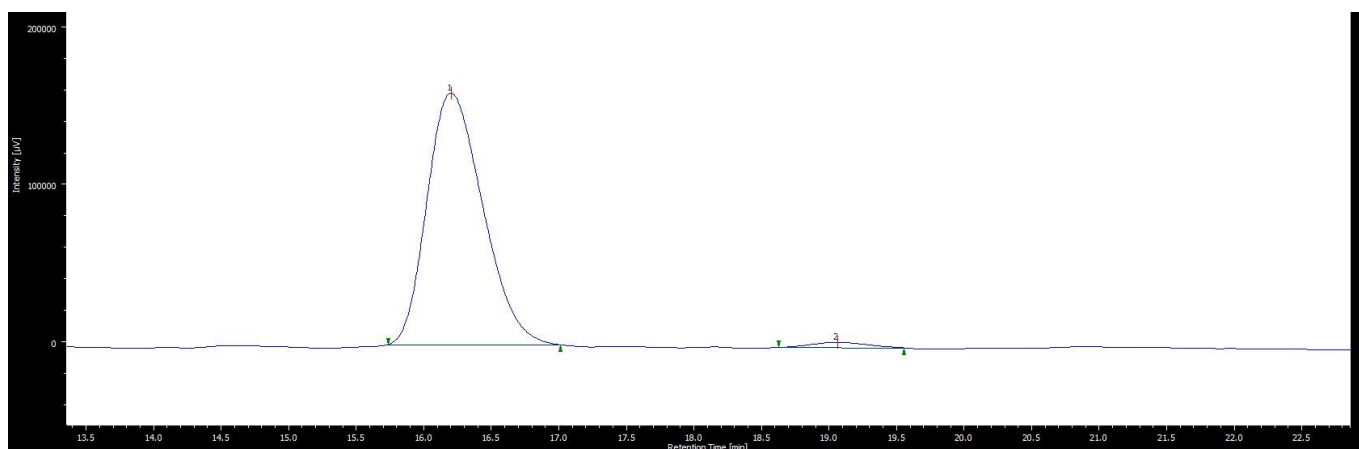

| racemic-10 |          |          | <i>(R)</i> -10 |          |          |
|------------|----------|----------|----------------|----------|----------|
| Peak       | tR (min) | Area (%) | Peak           | tR (min) | Area (%) |
| 1          | 16.1     | 50.2     | 1              | 16.2     | 97.9     |
| 2          | 18.9     | 49.8     | 2              | 19.1     | 2.1      |

**(4*R*)-4-[3-(Cyclopentyloxy)-4-methoxyphenyl]-2-pyrrolidinone (11)**

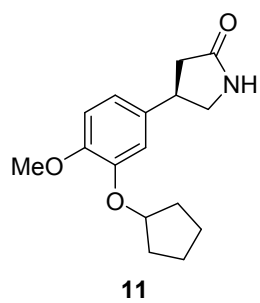

racemic-11

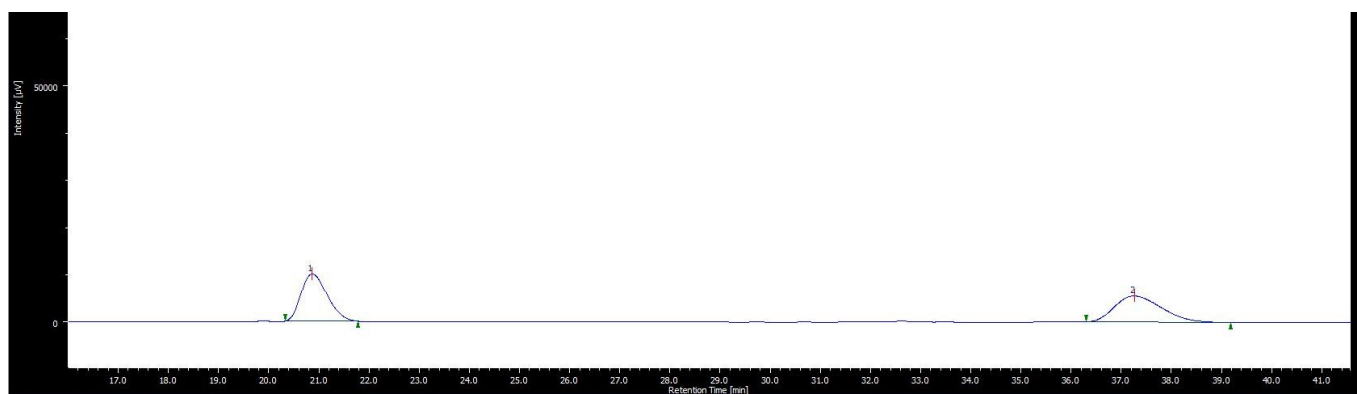

*(R)*-11

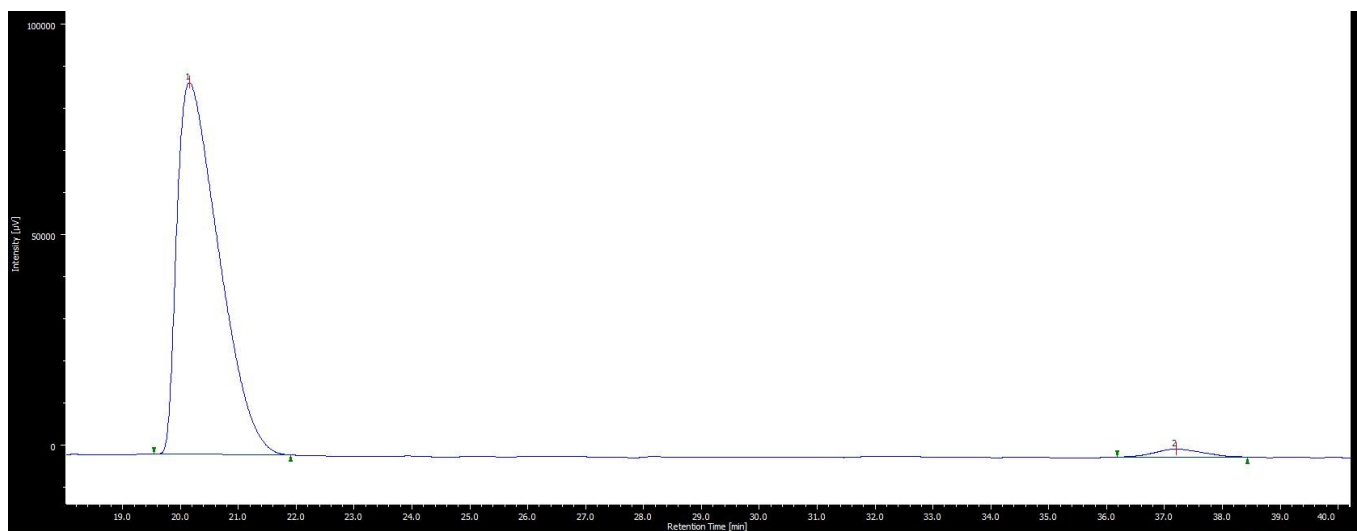

| racemic-11 |          |          | <i>(R)</i> -11 |          |          |
|------------|----------|----------|----------------|----------|----------|
| Peak       | tR (min) | Area (%) | Peak           | tR (min) | Area (%) |
| 1          | 20.9     | 50.0     | 1              | 20.2     | 97.6     |
| 2          | 37.3     | 50.0     | 2              | 37.2     | 2.4      |



### MO Calculations:

The Cartesian Coordination of **4f** and **2a** using Gaussian 16 B3LYP/6-31G\*, LANL2DZ(Pd) was shown in Table S2.

Table S2

| Center<br>Number | Atomic<br>Number | Atomic<br>Type | Coordinates (Angstroms) |           |           |
|------------------|------------------|----------------|-------------------------|-----------|-----------|
|                  |                  |                | X                       | Y         | Z         |
| 1                | 46               | 0              | -0.041523               | -0.492089 | -0.002411 |
| 2                | 7                | 0              | 0.100939                | 1.583189  | 0.229805  |
| 3                | 8                | 0              | -5.563823               | -3.087775 | -1.949662 |
| 4                | 7                | 0              | -2.070167               | -0.851463 | -0.392259 |
| 5                | 7                | 0              | -3.718500               | -2.318068 | -0.890061 |
| 6                | 6                | 0              | -3.375036               | 1.223483  | -1.114958 |
| 7                | 6                | 0              | -0.086409               | -5.188584 | -0.496156 |
| 8                | 6                | 0              | -3.108952               | 1.228741  | -2.503308 |
| 9                | 6                | 0              | -0.066492               | -2.433801 | -0.179439 |
| 10               | 6                | 0              | -4.352232               | -3.146592 | -1.836906 |
| 11               | 6                | 0              | -3.294707               | -0.039184 | -0.265632 |
| 12               | 6                | 0              | -2.361359               | -2.099332 | -0.658991 |
| 13               | 6                | 0              | -1.267175               | -3.075181 | -0.529280 |
| 14               | 6                | 0              | -6.792691               | -0.755723 | 0.388595  |
| 15               | 6                | 0              | -5.467900               | -1.206308 | 0.616443  |
| 16               | 6                | 0              | -3.797774               | 2.418973  | -0.486517 |
| 17               | 6                | 0              | -5.126263               | -1.726202 | 1.887108  |
| 18               | 6                | 0              | -7.729731               | -0.827255 | 1.421853  |
| 19               | 6                | 0              | -3.944525               | 3.579660  | -1.252810 |
| 20               | 6                | 0              | -6.104580               | -1.780981 | 2.887089  |
| 21               | 6                | 0              | -4.461554               | -1.065977 | -0.516470 |
| 22               | 6                | 0              | -7.410927               | -1.334007 | 2.683195  |
| 23               | 6                | 0              | -3.254488               | 2.421836  | -3.221948 |
| 24               | 6                | 0              | -3.665273               | 3.611268  | -2.619741 |
| 25               | 6                | 0              | -1.283206               | -4.476374 | -0.623036 |
| 26               | 8                | 0              | 5.353059                | -3.566195 | 1.561269  |
| 27               | 7                | 0              | 1.992118                | -0.972292 | 0.302604  |
| 28               | 7                | 0              | 3.579851                | -2.555223 | 0.588955  |
| 29               | 6                | 0              | 3.301483                | 0.879152  | 1.487720  |
| 30               | 6                | 0              | 3.849069                | 2.140154  | 1.147373  |

|    |    |   |           |           |           |
|----|----|---|-----------|-----------|-----------|
| 31 | 6  | 0 | 4.147660  | -3.571001 | 1.381037  |
| 32 | 6  | 0 | 3.237556  | -0.186326 | 0.397470  |
| 33 | 6  | 0 | 2.239946  | -2.255223 | 0.345155  |
| 34 | 6  | 0 | 1.124670  | -3.154928 | 0.010425  |
| 35 | 6  | 0 | 5.136826  | -1.486408 | -1.958094 |
| 36 | 6  | 0 | 5.429115  | -1.238152 | -0.596123 |
| 37 | 6  | 0 | 2.897381  | 0.639634  | 2.821590  |
| 38 | 6  | 0 | 6.753623  | -0.898787 | -0.224880 |
| 39 | 6  | 0 | 6.164108  | -1.387517 | -2.905742 |
| 40 | 6  | 0 | 3.018955  | 1.663102  | 3.765022  |
| 41 | 6  | 0 | 7.741386  | -0.806764 | -1.210904 |
| 42 | 6  | 0 | 4.368755  | -1.280285 | 0.496750  |
| 43 | 6  | 0 | 7.471349  | -1.043688 | -2.559629 |
| 44 | 6  | 0 | 3.958194  | 3.127881  | 2.129333  |
| 45 | 6  | 0 | 3.537272  | 2.920613  | 3.444238  |
| 46 | 6  | 0 | 1.120588  | -4.539894 | -0.214169 |
| 47 | 1  | 0 | -0.091696 | -6.265832 | -0.623636 |
| 48 | 1  | 0 | -3.323377 | 0.264804  | 0.781681  |
| 49 | 1  | 0 | -5.830617 | -2.192107 | 3.857836  |
| 50 | 1  | 0 | -5.001369 | -0.772682 | -1.411673 |
| 51 | 1  | 0 | -3.034804 | 2.418201  | -4.285716 |
| 52 | 1  | 0 | -2.202881 | -5.020627 | -0.801863 |
| 53 | 1  | 0 | 5.927734  | -1.583151 | -3.949421 |
| 54 | 1  | 0 | 2.698997  | 1.467254  | 4.788288  |
| 55 | 1  | 0 | 2.035077  | -5.120338 | -0.171193 |
| 56 | 1  | 0 | 3.327288  | 0.324690  | -0.561700 |
| 57 | 1  | 0 | 4.869900  | -1.179851 | 1.454444  |
| 58 | 6  | 0 | 0.023703  | 2.708017  | -0.151727 |
| 59 | 6  | 0 | -0.077739 | 3.983882  | -0.623645 |
| 60 | 1  | 0 | 4.382937  | 4.091565  | 1.856512  |
| 61 | 1  | 0 | 8.752501  | -0.542760 | -0.914360 |
| 62 | 1  | 0 | -4.262083 | 4.493229  | -0.751748 |
| 63 | 1  | 0 | -8.743755 | -0.482899 | 1.230912  |
| 64 | 16 | 0 | 1.306179  | 4.794288  | -1.386528 |
| 65 | 16 | 0 | -1.130340 | 5.174992  | 0.145496  |
| 66 | 6  | 0 | 0.324018  | 6.014094  | 0.946946  |
| 67 | 1  | 0 | 0.006603  | 6.999474  | 1.305759  |
| 68 | 1  | 0 | 0.634161  | 5.409531  | 1.805386  |
| 69 | 6  | 0 | 1.474604  | 6.128973  | -0.070541 |

|     |   |   |           |           |           |
|-----|---|---|-----------|-----------|-----------|
| 70  | 1 | 0 | 1.450078  | 7.088600  | -0.591292 |
| 71  | 1 | 0 | 2.437804  | 6.025957  | 0.439291  |
| 72  | 6 | 0 | -3.538365 | -4.022393 | -2.773292 |
| 73  | 1 | 0 | -2.482725 | -3.759210 | -2.844283 |
| 74  | 1 | 0 | -3.628756 | -5.074498 | -2.485058 |
| 75  | 1 | 0 | -4.002935 | -3.923696 | -3.758512 |
| 76  | 6 | 0 | 3.275953  | -4.603335 | 2.072219  |
| 77  | 1 | 0 | 2.225777  | -4.328965 | 2.158429  |
| 78  | 1 | 0 | 3.352133  | -5.568973 | 1.557077  |
| 79  | 1 | 0 | 3.703366  | -4.742280 | 3.067703  |
| 80  | 6 | 0 | -4.087859 | 2.503962  | 1.000617  |
| 81  | 1 | 0 | -3.184464 | 2.315922  | 1.596780  |
| 82  | 1 | 0 | -4.434450 | 3.506189  | 1.260311  |
| 83  | 1 | 0 | -4.857696 | 1.793028  | 1.324290  |
| 84  | 6 | 0 | -2.664966 | 0.002618  | -3.274083 |
| 85  | 1 | 0 | -1.674904 | -0.345412 | -2.958739 |
| 86  | 1 | 0 | -3.361818 | -0.836785 | -3.165932 |
| 87  | 1 | 0 | -2.609472 | 0.232362  | -4.342839 |
| 88  | 6 | 0 | -3.761864 | 4.898002  | -3.401496 |
| 89  | 1 | 0 | -4.643329 | 5.480638  | -3.104302 |
| 90  | 1 | 0 | -2.880822 | 5.524646  | -3.214152 |
| 91  | 1 | 0 | -3.820566 | 4.710738  | -4.476062 |
| 92  | 6 | 0 | -7.247306 | -0.207909 | -0.949104 |
| 93  | 1 | 0 | -6.675717 | 0.677419  | -1.256714 |
| 94  | 1 | 0 | -7.149522 | -0.963456 | -1.737430 |
| 95  | 1 | 0 | -8.300325 | 0.082614  | -0.894467 |
| 96  | 6 | 0 | -8.435657 | -1.375916 | 3.791034  |
| 97  | 1 | 0 | -8.551037 | -0.393150 | 4.262748  |
| 98  | 1 | 0 | -9.420272 | -1.672650 | 3.414715  |
| 99  | 1 | 0 | -8.147916 | -2.084818 | 4.576485  |
| 100 | 6 | 0 | -3.750196 | -2.259537 | 2.232046  |
| 101 | 1 | 0 | -3.506047 | -3.162700 | 1.658059  |
| 102 | 1 | 0 | -2.947828 | -1.537819 | 2.047808  |
| 103 | 1 | 0 | -3.705301 | -2.528491 | 3.291322  |
| 104 | 6 | 0 | 2.328087  | -0.681997 | 3.298122  |
| 105 | 1 | 0 | 1.346273  | -0.884893 | 2.858028  |
| 106 | 1 | 0 | 2.979898  | -1.530579 | 3.058762  |
| 107 | 1 | 0 | 2.208885  | -0.669252 | 4.385448  |
| 108 | 6 | 0 | 4.321596  | 2.475207  | -0.254376 |

|     |   |   |          |           |           |
|-----|---|---|----------|-----------|-----------|
| 109 | 1 | 0 | 3.478391 | 2.558404  | -0.950158 |
| 110 | 1 | 0 | 4.823453 | 3.447718  | -0.255760 |
| 111 | 1 | 0 | 5.029100 | 1.740508  | -0.650850 |
| 112 | 6 | 0 | 3.623443 | 4.019131  | 4.476633  |
| 113 | 1 | 0 | 4.504443 | 4.649613  | 4.319753  |
| 114 | 1 | 0 | 2.742010 | 4.672850  | 4.432652  |
| 115 | 1 | 0 | 3.673974 | 3.611258  | 5.493832  |
| 116 | 6 | 0 | 3.763561 | -1.883062 | -2.461868 |
| 117 | 1 | 0 | 3.459459 | -2.866332 | -2.084834 |
| 118 | 1 | 0 | 2.978945 | -1.169872 | -2.181927 |
| 119 | 1 | 0 | 3.771152 | -1.939226 | -3.554298 |
| 120 | 6 | 0 | 7.157107 | -0.638977 | 1.213952  |
| 121 | 1 | 0 | 6.991536 | -1.525936 | 1.833905  |
| 122 | 1 | 0 | 8.220630 | -0.386012 | 1.268281  |
| 123 | 1 | 0 | 6.601268 | 0.193767  | 1.661008  |
| 124 | 6 | 0 | 8.550711 | -0.907944 | -3.608996 |
| 125 | 1 | 0 | 8.328826 | -1.510129 | -4.493571 |
| 126 | 1 | 0 | 8.647797 | 0.136706  | -3.941620 |
| 127 | 1 | 0 | 9.526187 | -1.212964 | -3.220779 |

---
